# Supplementary material for: Hsa-miR-181a-2-3p inhibits the oncogenicity of colon cancer by directly targeting STING
Source: publisher site journal article supplement (doi:10.18632/aging.206059), 2024-08-09
Supplement: Supplementary file [file aging-v16i15-206059-supplementary-material-SD1.pdf]

## SUPPLEMENTARY FILE

### Supplementary File 1. The sequence of pmirGLO plasmid.

1 catgcaagct gatccggctg ctaacaaagc ccgaaaggaa gctgagttgg ctgctgccac  
61 cgctgagcaa taactagcat aacccttgg ggcgccgct tcgagcgac atgataagat  
121 acattgatga gtttgacaa accacaacta gaatcagtg aaaaaaatgc tttatttg  
181 aaattgtga tgctattgct ttattgtaa ccattataag ctgcaataaa caagtaaca  
241 acaacaatg cactattt atgttcagg ttcaggggga gatgtgggag gttttitaa  
301 gcaagtaaaa cctctacaaa tgggtaaaa tgaatttta acaaatatt aacgcttaca  
361 atttctgat gcggtatttt ctcttacgc atctgtcggg tatttcacac cgcatacgcg  
421 gatctgcgca gcaccatggc ctgaaataac ctctgaaga ggaacttgg taggtacctt  
481 ctgaggggga aagaaccagc tgtggaatgt gtgtcagtta gggtgtgga agtccccagg  
541 ctccccaga ggcagaagta tgcagaagc gcactcaat tagtcagcaa ccagggtggt  
601 aaagtccccca ggtccccag caggcagaag tatgcaaagc atgcatctca attagtcagc  
661 aaccatagtc ccgccctaa ctccgccat ccgcccta actccgcca gttccgcca  
721 ttctccgcc catggctgac taatttttt tatttatgca gaggccgagg ccgctcggc  
781 ctctgagcta ttccagaagt agtgaggagg ctttttggg ggcctaggct tttcaaaaa  
841 gcttgattct tctgacaaa cagtctgaa ccaaggctg gagccacat ggcctcaag  
901 gtgtacgacc ccgacaagc caaacgcatg atcactggc ctcagtggg ggctcgtgc  
961 aagcaatga acgtgctgga ctcttcate aactactatg attccgagaa gcacggag  
1021 aacgccgtga ttttctgca tggtaacgt gcctccagct acctgtggag gcacgtctg  
1081 cctcacatgc agcccgggc tagatgcat atccctgac tgcaggat gggttaagtc  
1141 ggcaagagcg ggaatggctc atatgcctc ctggatcact acaagtact caccgcttg  
1201 ttgagctgc tgaacctcc aaagaaatc atctttggt gccacgactg gggggctgt  
1261 ctggccttc actactca cgagcacca gacaagatca agccatcgt ccattgctgag  
1321 agtctctgg acgtgctga gtctgggac gctggcctg acatcgagga ggatctgac  
1381 ctgatcaaga gcgaagagg cgagaaaatg gtgctgaga ataactctt cgtcagacc  
1441 atgtcccaa gcaagatcat gcgaaactg gagcctgagg agttcgtct ctactggag  
1501 ccattcaagg agaagggcga ggttagacgg cctaccctc cctggcctc cgagatcct  
1561 ctcttaagg gaggaagcc cgacgtctc cagattgct gcaactaca cgctacct  
1621 cgggccagc acgatctgcc taagatgct atcagatcc accctgggt cttttcaac  
1681 gctattgct agggagctaa gaagtccct aacaccgagt tctgaaggt gaaggcctc  
1741 cacttcagcc agggagcgc tccagatga atgggtaagt acatcaagag ctctgtggg  
1801 cgcgtctga agaacgagc gaccggtgt gggagcggg gtggcggatc aggtggcgg  
1861 ggctccggg ggaatgaaca agatggatt cagcaggtt ctccggccgc ttgggtggg  
1921 aggtatctg gctatgact ggcacaacag acaatcggt gctctgac gcctgtct  
1981 cggctgctg cgcagggggc cccggtctt ttgtcaaga ccgactgct cggtccctg  
2041 aatgaactgc aggacgagc agcgcggta tctgtgctg ccacgacgg cgttctctg  
2101 cgacgtgct cgacgtgt cactgaagc ggaaggact ggctgctat gggcgaagt  
2161 ccggggcagg atctctgct atctacct gctctgccg agaaagtat catcatggt  
2221 gatcaatgc ggcggctgca tacgttgat ccggctact cccattcga ccaccaagc  
2281 aaacatgca tgcagcagc agtactcgg atggaagcc gtctgtgca tcaggatgat  
2341 ctggacgaag agcatcagg gctcgcgca gccgaactg tccagagct caagcgcgc  
2401 atgcccagc gcagagatc cgtctgacc catggcgtg cctgcttgc gaatcatg  
2461 tgggaaaatg gccgcttct tggattcact gactgtggc ggctgggtg ggcggaccg  
2521 tatcaggaca tagcgttgc taccctgat attgctgag agctggcgg cgaatgggt  
2581 gaccgtccc tegtcttta cggatcgc gctccgatt cgcagcgc atcctctat  
2641 cgctcttct acgattctt ctgagcggg ctctggggt cgaatgacc gaccaagca  
2701 cgcccaact ccacacga tggcccaat aaaatatct tatttctt acatctgt  
2761 gttggtttt tgtgtaac gatagcga agatcctt ttgcgttgc gtttccct  
2821 gtcagatag ccagtagct gacattcact cggggtcagc accgttctg cggactggct  
2881 ttctactgaa tggtttcta gacgtcaggt ggcactttc ggggaaatg gcgcggaacc  
2941 cctattgtt tattttcta aatacttca aatatgac cgtcatgag acaataacc  
3001 tgataaatg tcaataata ttgaaaagg aagagtatga gtattcaaca ttccgtgct  
3061 gcccttatt cttttttgc gccatttgc ctctctgt ttgctcacc agaaacgct  
3121 gtgaaaataa aagatcctga agatcagtt ggtgcacgag tgggttacc cgaatggat  
3181 ctcaacagc gtaagatct tgagattt cgccccgaag aacgtttcc aatgatgagc  
3241 acttcaag ttctgctat tggcgcgta ttatccgta ttgacccgg gcaagagcaa  
3301 ctggctgcc gcatacacta ttctagaat gacttgggt agtactcacc agtcacagaa  
3361 aagcatctta cggatggcat gacagtaaga gaattatgca gtgctgcat aaccatgat  
3421 gataacactg cggcaactt actctgaca actatcgag gaccgaagga gtaaccgct  
3481 ttttgaca acatggggga tcatgtaact cgcttgatc gttgggaacc ggagctgaa  
3541 gaagccatac caaacgacg gcgtgacac acgatgctg tagcaatggc aacaagttg  
3601 cgcaaaacta taactggcg actacttact ctacttccc ggcaacaatt aatagactgg  
3661 atggaggcgg ataaagtgc aggaccact ctgcgctcgg ccctccggc ttgctgggt  
3721 attgctgata aatctggagc cgtgagcgt ggtctcgcg gtatcattg agcactggg

3781 ccagatggtg agccctcccg tategtagtt atctacacga cggggagtgca ggcaactatg  
3841 gatgaacgaa atagacagat cgctgagata ggtgccfcac tgattaagca ttgtaattc  
3901 gaaatgaccg accaagcgcac gcccaaccgg taccagctca ctcaaaggcg gtaatacggg  
3961 tatccacaga atcaggggat aacgcaggaa agaacatgtg agcaaaaggc cagcaaaagg  
4021 ccaggaaccg taaaaggccg gcgttgctgg cgtttttcca taggtccgcg cccccgacg  
4081 agcatcaca aatcgcacgc tcaagtcaga ggtggcgaaa cccgacagga ctataaagat  
4141 accaggcgtt tccccctgga agtccctcg tgcgcttccc tgttccgacc ctgccgctta  
4201 ccggatacct gtccgcttt ctcccttcgg gaagcgtggc gctttcicat agctcacgct  
4261 gtaggtatct cagttcggtg taggtcgttc gctccaagct gggctgtgtg cacgaacccc  
4321 ccgttcagcc cgaccgctgc gccttatccg gtaactatcg tcttgagtc aacccggtaa  
4381 gacacgactt atcggcactg gcagcagcca ctgtaaacag gattagcaga gcgaggtatg  
4441 taggcggtgc tacagagttc ttgaagtggg ggcctaacta cggctacact agaaggacag  
4501 tatttggtat ctgcgctctg ctgaagccag ttacctcgg aaaaagagtt ggtagctctt  
4561 gatccggcaa acaaacacc gcfggtagcg gtggttttt ttgttgaag cagcagatta  
4621 cgcgcagaaa aaaaggattt caagaagatc ctttgatctt ttctacgggg tctgacgctc  
4681 agtggaacga aaactcactg taagggattt tggatcatg altatcaaaa aggatctca  
4741 cctagatcct ttatagtc ggaatacag gaacgcacgc tggatggccc ttcgctggga  
4801 ttgtgaaacc atgaaaatg gcagctcag tggattaagt gggggtaatg tggcctgtac  
4861 cctctggtg cataggtatt catacgtta aaattatca ggccgctg cggcagttt  
4921 tcgggtggtt tgttgcatt ttacctgct tctgcccgtg atcgcgctga acgctttta  
4981 gcggtgcgta caattaaggg attatggtaa atccactac tcttgcct ctgagccatc  
5041 gagataaac gcagtactcc gcccacgatg cgtccggcgt agaggatcga gatctaccgg  
5101 gtaggggagg cgctttccc aaggcagctt ggagatcgc cttagcagc cccgctgggc  
5161 acttggcgtc acacaatgg cctctggcct cgcacacatt ccaatccac cggtaggcgc  
5221 caaccgctc cgttctttgg tggcccctc gcgccacctt ctactctcc cctagtacg  
5281 aagtcccc ccgcccgc gctcgcctg tgcaggacgt gacaaatgga agtagcacgt  
5341 ctactagtc tctgagat ggacagcacc gctgagcaat ggaagcgggt aggcctttgg  
5401 ggacgcggcc aatagcagct ttgctcttc gctttctgg ctacagagct gggaaagggt  
5461 gggctccggg gcgggctcag gggcgggctc agggcgggg cgggcgccc aagctctcc  
5521 ggaggcccgg catctcgcac gctcaaaaag cgcagctctg ccgctgctt ctctctcc  
5581 tcatctcgg cctttcgac ctgacccca agcttgcaa tccgctact ttgtaaaagc  
5641 caccatgaa gatgcaaaa acattaagaa gggcccagc cactctacc cactgaaga  
5701 cgggaccgcc ggcgagcag tcacaaaagc catgaagcgc tacgccctgg tccccggc  
5761 catgccttt accgacgc atactgaggt ggacattacc tacgccaggt acttcgagat  
5821 gagcgttcg ctggcagaag ctatgaagc ctatgggctg aatacaaac atcggatcgt  
5881 ggtgtgcagc gagaatagct tgcagttct catgccctg ttgggtgcc ttgtcatcgg  
5941 ttgtgctgtg gccccagta acgacatcta caacagcgc gagctgctga acagcatggg  
6001 catcagccag cccaccgctg tttctgtg caagaaagg ctgcaaaaga tctcaactg  
6061 gcaaaagaag ctaccgata tacaagaat catcatcat gatagcaaga ccgactacca  
6121 gggcttcaa agcatgtaca cctctgtgac ttcccattg caccggct tcaacagta  
6181 cgactctg cccgagagct tgcaccggga caaaaccatc gcctgatca tgaacagtag  
6241 ttggcagtag gtaggtgagg ccgtggcaca acgcttccac ctaccggca tccgcccagg  
6301 cagctatgcc cgcgaccca tcttggcaa ceagatcacc cccgacacc ctactctcag  
6361 cgtggtgcca ttaccacg gcttcggcat gttaccacg ctgggctact tcatctcgg  
6421 cttcgggct gtcctcatg accgctcga ggaggagcta ttcttgcga gcttcaaga  
6481 ctataagatt caatctgcc tctggtgccc cacactatt agcttcttc ctaagagcac  
6541 tctcatgac aagtagacc taagcaact gcacgagatc gccagggcg gggcgccgct  
6601 cagcaaggag gtaggtgagg ccgtggcaca acgcttccac ctaccggca tccgcccagg  
6661 ctaccgctg acagaaaca ccagcgcct tctgatcacc cccgaagggg acgacaagcc  
6721 ttggcgagta ggcaaggtg tgccttctt cgaggctaag gtggtgact tggacaccg  
6781 taagacactg ggtgtgaacc agcgcggcga gctgtgctc cgtggccca tcatatgag  
6841 cggctactg aacaacccc aggtacaaa cgctctcacc gacaaggac gctgctgca  
6901 cagcggcagc atcgctact gggacagga cgagcactt tcatcgtgg accggctgaa  
6961 gagcctgac aaatacaagg gctaccaggt agccccagcc gaactggaga gcatcctgct  
7021 gcaacacccc aacatcttc acgcccgggt cgcccgcct cccgacgag atgcccggca  
7081 gctgcccgc cgagctgctg tcttgaaca cggtaaaacc atgaccgaga aggagatcgt  
7141 ggactatgtg gccagccagg ttacaaccgc caagaagctg cgcggtggtg ttgttctgt  
7201 ggacgaggtg ctaaaaggc taccggcaa gttggagcc ccaagatcc gcgagattc  
7261 cattaaggcc aagaaggcg gcaagatgc cgtgtaattc tagttttta aacgagctg  
7321 ctaccctga gtctagatc gacctgagg
