# Supplementary material for: Hsa-miR-181a-2-3p inhibits the oncogenicity of colon cancer by directly targeting STING
Source: Aging (Albany NY). 2024 Aug 9;16(15):11729–43. doi: 10.18632/aging.206059 (PMC11346793; doi:10.18632/aging.206059)
Supplement: Supplementary Table 1 [file aging-16-206059-s002.xlsx]

## Sheet: aging-24-018742-s002
Supplementary Table 1. The clinical information of colon cancer patients from TCGA datasets.
submitter_id.samples	age_at_initial_pathologic_diagnosis	batch_number	bcr	bcr_followup_barcode	bcr_followup_uuid	submitter_id	braf_gene_analysis_performed	braf_gene_analysis_result	circumferential_resection_margin	colon_polyps_present	date_of_withdraw	day_of_dcc_upload	day_of_form_completion	days_to_initial_pathologic_diagnosis	file_uuid	followup_case_report_form_submission_reason	followup_treatment_success	history_of_colon_polyps	history_of_neoadjuvant_treatment	informed_consent_verified	kras_gene_analysis_performed	kras_mutation_codon	kras_mutation_found	loss_expression_of_mismatch_repair_proteins_by_ihc	lost_follow_up	lymph_node_examined_count	lymphatic_invasion	microsatellite_instability	month_of_dcc_upload	month_of_form_completion	non_nodal_tumor_deposits	number_of_abnormal_loci	number_of_first_degree_relatives_with_cancer_diagnosis	number_of_loci_tested	number_of_lymphnodes_positive_by_he	number_of_lymphnodes_positive_by_ihc	other_dx	pathologic_M	pathologic_N	pathologic_T	patient_id	perineural_invasion_present	person_neoplasm_cancer_status	postoperative_rx_tx	preoperative_pretreatment_cea_level	primary_lymph_node_presentation_assessment	primary_therapy_outcome_success	radiation_therapy	reason_for_withdraw
TCGA-F4-6460-01A	51	123.74.0	Nationwide Children's Hospital	TCGA-F4-6460-F29824	C5664BD6-77BB-4B54-95E7-0253119610DE	TCGA-F4-6460	NO			NO		22	29	0	5020AB92-122D-4873-BA89-90921B861895	Scheduled Follow-up Submission		NO	No	YES	NO			NO		6	NO		12	3	NO				1	0	No	M0	N1	T3	6460	NO	WITH TUMOR	YES		YES		NO
TCGA-A6-3807-01A	53	41.78.0	Nationwide Children's Hospital	TCGA-A6-3807-F2546	0ac8de49-6a23-48b4-af74-8aaf2a64ca09	TCGA-A6-3807	NO			YES		22	26	0	8CD0B50A-9B2D-4D68-BA14-430AB512446C			NO	No	YES	NO			NO		24	YES	NO	12	10	NO	0	0	5	5		No	M0	N2	T3	3807		TUMOR FREE	YES	45	YES		NO
TCGA-A6-3807-11A	53	41.78.0	Nationwide Children's Hospital	TCGA-A6-3807-F2546	0ac8de49-6a23-48b4-af74-8aaf2a64ca09	TCGA-A6-3807	NO			YES		22	26	0	8CD0B50A-9B2D-4D68-BA14-430AB512446C			NO	No	YES	NO			NO		24	YES	NO	12	10	NO	0	0	5	5		No	M0	N2	T3	3807		TUMOR FREE	YES	45	YES		NO
TCGA-AA-A01C-01A	75	33.79.0	Nationwide Children's Hospital	TCGA-AA-A01C-F37307	46508480-8E1F-419E-BAF0-708998F1FF2A	TCGA-AA-A01C	NO					22	1	0	A6B980C5-C6E8-44A3-B5C2-105AA2EED356	Scheduled Follow-up Submission	Complete Remission/Response	YES	No	YES	NO			NO	NO	31	YES		12	12			0		3		No	M0	N1	T2	A01C		TUMOR FREE	NO		YES		NO
TCGA-A6-A566-01A	55	300.56.0	Nationwide Children's Hospital	TCGA-A6-A566-F42248	B606B322-10CC-448D-8676-D394D2E536CD	TCGA-A6-A566				NO		22	15	0	07818367-C3E1-454A-80A7-A9B9C6180CCC	Additional New Tumor Event	Progressive Disease	NO	No	YES	YES		NO		NO	13	YES		12	4			0		2		No	M0	N1	T4	A566		WITH TUMOR	YES		YES	Progressive Disease	NO
TCGA-AA-3870-01A	71	41.78.0	Nationwide Children's Hospital	TCGA-AA-3870-F37988	E2FBA897-7789-4DC4-8E4C-C430A3AC06BF	TCGA-AA-3870	NO					22	8	0	7A361D1C-3E32-44EF-AC40-2073DE80285A	Scheduled Follow-up Submission	Complete Remission/Response	YES	No	YES	NO			NO	NO	23	YES		12	12			1		5		Yes	M1	N2	T3	3870		TUMOR FREE	YES		YES	Complete Remission/Response
TCGA-AA-3715-01A	77	36.83.0	Nationwide Children's Hospital	TCGA-AA-3715-F38103	D6B2820C-2B23-4C8D-8F95-F9F7DF323A5C	TCGA-AA-3715	NO					22	10	0	E115E375-BF2B-411F-8AA2-E3E990A727BF	Scheduled Follow-up Submission		YES	No	YES	NO			NO	NO	12	YES		12	12			0		0		Yes	M0	N0	T3	3715			NO	7.05	YES		NO
TCGA-AZ-6600-01A	64	123.74.0	Nationwide Children's Hospital	TCGA-AZ-6600-F34147	98402D27-0304-4BA2-9D6A-521B4D30F699	TCGA-AZ-6600						22	31	0	DC2716C7-3DC2-4D7E-B89D-76199136AAFF	Scheduled Follow-up Submission	Progressive Disease		No	YES					NO	10	YES		12	7					1		No	M1	N1	T4	6600	YES	WITH TUMOR	YES	20.1	YES	Progressive Disease	NO
TCGA-AZ-6600-11A	64	123.74.0	Nationwide Children's Hospital	TCGA-AZ-6600-F34147	98402D27-0304-4BA2-9D6A-521B4D30F699	TCGA-AZ-6600						22	31	0	DC2716C7-3DC2-4D7E-B89D-76199136AAFF	Scheduled Follow-up Submission	Progressive Disease		No	YES					NO	10	YES		12	7					1		No	M1	N1	T4	6600	YES	WITH TUMOR	YES	20.1	YES	Progressive Disease	NO
TCGA-AA-3968-01A	55	41.78.0	Nationwide Children's Hospital	TCGA-AA-3968-F37951	C4C7AB20-9C5D-4A4B-8B26-AC3F1ED65703	TCGA-AA-3968	NO					22	6	0	DDA77EF3-17DF-48F2-8B7B-47A80A21565A	Scheduled Follow-up Submission	Complete Remission/Response	NO	No	YES	NO			NO	NO	19	NO		12	12			1		0		No	M0	N0	T2	3968		TUMOR FREE	NO	1.55	YES	Complete Remission/Response	NO
TCGA-A6-2671-01A	85	76.78.0	Nationwide Children's Hospital	TCGA-A6-2671-F6018	10ec0e4e-441f-4654-89e4-0f17c6426814	TCGA-A6-2671	NO			NO		22	24	0	52D02D27-F523-4FB1-99CD-D84719859480			YES	No	YES	NO					27	YES		12	1	YES		0		3		No	M1	N2	T3	2671		WITH TUMOR	YES	17.4	YES		NO
TCGA-A6-2671-11A	85	76.78.0	Nationwide Children's Hospital	TCGA-A6-2671-F6018	10ec0e4e-441f-4654-89e4-0f17c6426814	TCGA-A6-2671	NO			NO		22	24	0	52D02D27-F523-4FB1-99CD-D84719859480			YES	No	YES	NO					27	YES		12	1	YES		0		3		No	M1	N2	T3	2671		WITH TUMOR	YES	17.4	YES		NO
TCGA-AY-A71X-01A	54	385.43.0	Nationwide Children's Hospital	TCGA-AY-A71X-F68764	517DE6A6-B4FC-4A0A-81F7-1AFDD582FF8C	TCGA-AY-A71X	NO			YES		22	15	0	C674AF6B-F9AF-4FC5-9A15-3FD8630CEAA4	Scheduled Follow-up Submission	Complete Remission/Response	NO	No	YES	NO			YES	NO	28	NO	NO	12	12	NO		0		0		No	M0	N0	T2	A71X	NO	TUMOR FREE	NO	4.8	YES	Complete Remission/Response	NO
TCGA-AA-3532-01A	63	28.86.0	Nationwide Children's Hospital	TCGA-AA-3532-F37317	77DB2106-5A6E-462F-AD80-6BDFC1E4209B	TCGA-AA-3532	NO					22	1	0	32D47447-2574-4C92-B78B-FB2C209F4155	Scheduled Follow-up Submission		NO	No	YES	NO			NO	NO	35	NO		12	12			0		0		No	M0	N0	T3	3532			NO	1.28	YES		NO
TCGA-AA-3532-11A	63	28.86.0	Nationwide Children's Hospital	TCGA-AA-3532-F37317	77DB2106-5A6E-462F-AD80-6BDFC1E4209B	TCGA-AA-3532	NO					22	1	0	32D47447-2574-4C92-B78B-FB2C209F4155	Scheduled Follow-up Submission		NO	No	YES	NO			NO	NO	35	NO		12	12			0		0		No	M0	N0	T3	3532			NO	1.28	YES		NO
TCGA-A6-5662-01A	46	89.77.0	Nationwide Children's Hospital	TCGA-A6-5662-F18198	56638b81-e2a6-41ea-84ca-942a64fe13d4	TCGA-A6-5662	NO			NO		22	8	0	7AF3462B-2726-40BE-9A42-D3A7707D89E6			NO	No	YES	YES	12	YES	YES		13	YES	NO	12	11	YES	0	0	5	7		No	M1	N2	T3	5662		WITH TUMOR	YES		YES		NO
TCGA-A6-5662-11A	46	89.77.0	Nationwide Children's Hospital	TCGA-A6-5662-F18198	56638b81-e2a6-41ea-84ca-942a64fe13d4	TCGA-A6-5662	NO			NO		22	8	0	7AF3462B-2726-40BE-9A42-D3A7707D89E6			NO	No	YES	YES	12	YES	YES		13	YES	NO	12	11	YES	0	0	5	7		No	M1	N2	T3	5662		WITH TUMOR	YES		YES		NO
TCGA-AA-3696-01A	75	36.83.0	Nationwide Children's Hospital	TCGA-AA-3696-F38096	5E737FE8-F80B-493A-966A-8F8951042C35	TCGA-AA-3696	NO			YES		22	10	0	036DF02A-48C0-48BE-ADE3-F3296575420E	Scheduled Follow-up Submission		YES	No	YES	NO			NO	NO	26	NO		12	12			0		1		No	M1	N1	T3	3696			NO		YES		NO
TCGA-CA-5254-01A	42	138.78.0	Nationwide Children's Hospital	TCGA-CA-5254-F20286	6de790b5-e912-4c6c-bb3f-419e7299c0b1	TCGA-CA-5254						22	9	0	29EBC64A-E925-455A-86B7-3597041BB57D				No	YES									12	1							No	M0	N0	T3	5254		TUMOR FREE	YES		NO		NO
TCGA-AA-3858-01A	67	36.83.0	Nationwide Children's Hospital	TCGA-AA-3858-F37998	3477AA26-DE8E-4C5E-AC8A-B1B6F381AF35	TCGA-AA-3858	NO					22	8	0	491FB496-478C-4815-8BA0-09BD64A798D0	Scheduled Follow-up Submission	Complete Remission/Response	YES	No	YES	NO			NO	NO	12	YES		12	12			1		0		No	M0	N0	T2	3858		TUMOR FREE	NO		YES	Complete Remission/Response	NO
TCGA-A6-6782-01A	82	138.78.0	Nationwide Children's Hospital	TCGA-A6-6782-F29583	ef0e3db6-7ea5-4685-b159-fa133ae9db75	TCGA-A6-6782	NO			NO		22	23	0	9036C106-FBB6-463F-9470-44555279F991			NO	No	YES	NO			NO		25	NO		12	3	YES				0		No	MX	N0	T4a	6782	YES	TUMOR FREE	NO	2.7	YES		NO
TCGA-D5-6537-01A	64	116.77.0	Nationwide Children's Hospital	TCGA-D5-6537-F28923	867db67e-686b-4bfa-97d6-ba7216a534f9	TCGA-D5-6537	NO		18	YES		22	2	0	A8CCA3BE-3015-4354-BE5D-7E8C0A9008AE	Scheduled Follow-up Submission			No	YES	NO					11	YES		12	3	NO		0		1		No	MX	N1a	T3	6537	YES	WITH TUMOR	NO	2.7	YES		NO
TCGA-A6-2685-01A	48	76.78.0	Nationwide Children's Hospital	TCGA-A6-2685-F7024	061b693d-55d3-4f32-8a1e-0c6c107ce80c	TCGA-A6-2685	NO			NO		22	2	0	B28D980C-9C67-4C97-A5F4-141D9487D12B				No	YES	NO					29	NO		12	2	NO		0		0		No	M0	N0	T3	2685		TUMOR FREE	NO	29.5	YES		NO
TCGA-A6-2685-11A	48	76.78.0	Nationwide Children's Hospital	TCGA-A6-2685-F7024	061b693d-55d3-4f32-8a1e-0c6c107ce80c	TCGA-A6-2685	NO			NO		22	2	0	B28D980C-9C67-4C97-A5F4-141D9487D12B				No	YES	NO					29	NO		12	2	NO		0		0		No	M0	N0	T3	2685		TUMOR FREE	NO	29.5	YES		NO
TCGA-AA-3680-01A	67	36.83.0	Nationwide Children's Hospital	TCGA-AA-3680-F38089	75D11811-3CEE-42FF-82EB-47E11F01886C	TCGA-AA-3680	NO					22	10	0	F77ABC2E-E349-4045-BE70-19F999D30FCA	Scheduled Follow-up Submission	Progressive Disease	NO	No	YES	NO			NO	NO	35	YES		12	12			0		12		No	M1	N2	T4	3680		WITH TUMOR	YES	59.94	YES	Progressive Disease	NO
TCGA-AZ-6605-01A	77	138.78.0	Nationwide Children's Hospital	TCGA-AZ-6605-F34154	58A9C23A-7394-458B-A7EB-75006F85004B	TCGA-AZ-6605						22	31	0	12AB7C76-BD33-4CA6-8F8D-EA318F18D4C5	Scheduled Follow-up Submission	Stable Disease		No	YES					NO	22	YES		12	7					1		No	M0	N1	T4	6605	NO	TUMOR FREE	YES	2.5	YES	Stable Disease	NO
TCGA-AZ-6605-11A	77	138.78.0	Nationwide Children's Hospital	TCGA-AZ-6605-F34154	58A9C23A-7394-458B-A7EB-75006F85004B	TCGA-AZ-6605						22	31	0	12AB7C76-BD33-4CA6-8F8D-EA318F18D4C5	Scheduled Follow-up Submission	Stable Disease		No	YES					NO	22	YES		12	7					1		No	M0	N1	T4	6605	NO	TUMOR FREE	YES	2.5	YES	Stable Disease	NO
TCGA-AA-A02O-01A	82	66.81.0	Nationwide Children's Hospital			TCGA-AA-A02O	NO					22		0	904AA4BA-AE92-47CA-8EA5-49B8DBB868B2			NO	No	YES	NO			NO		18	YES		12				0		0		No	M0	N0	T3	A02O				5.97	YES
TCGA-AA-A02O-11A	82	66.81.0	Nationwide Children's Hospital			TCGA-AA-A02O	NO					22		0	904AA4BA-AE92-47CA-8EA5-49B8DBB868B2			NO	No	YES	NO			NO		18	YES		12				0		0		No	M0	N0	T3	A02O				5.97	YES
TCGA-CA-6716-01A	65	138.78.0	Nationwide Children's Hospital	TCGA-CA-6716-F70864	6DAF087E-7B22-46B4-B37D-3C0781CD0E07	TCGA-CA-6716						22	10	0	177451DC-A327-430C-B34B-108F33B88588	Scheduled Follow-up Submission	Complete Remission/Response		No	YES					NO				12	3							No	M0	N0	T3	6716		TUMOR FREE	YES		NO	Complete Remission/Response	NO
TCGA-AA-3534-01A	78	28.86.0	Nationwide Children's Hospital	TCGA-AA-3534-F37319	5B6EA674-C1CC-40B6-98B2-2BA694B2AD0D	TCGA-AA-3534	NO					22	1	0	6F594437-AE92-41FB-B812-4A236FE2B155	Scheduled Follow-up Submission	Complete Remission/Response	YES	No	YES	NO			NO	NO	36	YES		12	12			1		0		No	M0	N0	T3	3534		TUMOR FREE	NO	1.56	YES	Complete Remission/Response	NO
TCGA-AA-3534-11A	78	28.86.0	Nationwide Children's Hospital	TCGA-AA-3534-F37319	5B6EA674-C1CC-40B6-98B2-2BA694B2AD0D	TCGA-AA-3534	NO					22	1	0	6F594437-AE92-41FB-B812-4A236FE2B155	Scheduled Follow-up Submission	Complete Remission/Response	YES	No	YES	NO			NO	NO	36	YES		12	12			1		0		No	M0	N0	T3	3534		TUMOR FREE	NO	1.56	YES	Complete Remission/Response	NO
TCGA-AA-A00F-01A	66	30.80.0	Nationwide Children's Hospital	TCGA-AA-A00F-F37931	118C2D51-6961-4975-8E8E-2895C8A36910	TCGA-AA-A00F	NO					22	6	0	E4ABCDD9-A7AC-4010-A5BE-72A0D16AA4CD	Scheduled Follow-up Submission	Partial Remission/Response	NO	No	YES	NO			NO	NO	25	YES		12	12			0		7		No	M0	N2	T3	A00F		TUMOR FREE	YES	2.93	YES	Partial Remission/Response	NO
TCGA-AA-3860-01A	53	36.83.0	Nationwide Children's Hospital	TCGA-AA-3860-F37997	2EF46C9E-FC1B-440F-A15A-EE37772766A5	TCGA-AA-3860	NO					22	8	0	55001145-3234-4F93-B821-67DAF3DB82FF	Scheduled Follow-up Submission	Complete Remission/Response	YES	No	YES	NO			NO	NO	14	YES		12	12			0		2		Yes	M0	N1	T3	3860		TUMOR FREE	YES		YES	Complete Remission/Response	NO
TCGA-NH-A50U-01A	42	385.43.0	Nationwide Children's Hospital			TCGA-NH-A50U	NO		5	YES		22		0	6F7011DB-A33E-4A90-9B44-36A0FDFB2AEE				No	YES	YES	12	YES			17	NO		12		NO		0		0		No	M1a	N0	T4a	A50U	YES				YES
TCGA-F4-6809-01A	52	138.78.0	Nationwide Children's Hospital	TCGA-F4-6809-F31711	F13A8E30-9361-4847-BC94-78EBB5A83C83	TCGA-F4-6809	NO			NO		22	8	0	1641A079-3539-4D76-8E85-1ECD03EAE8D5	Scheduled Follow-up Submission			No	YES	NO			NO		12	NO		12	5	NO		0		3		No	M1	N1	T3	6809	NO	WITH TUMOR	NO		YES		NO
TCGA-AA-3516-01A	74	29.82.0	Nationwide Children's Hospital	TCGA-AA-3516-F37287	DF185582-7617-426F-8ABA-564EF8A496AD	TCGA-AA-3516	NO					22	1	0	8A2285D9-4163-40CE-BFE2-96C22F21B8FF	Scheduled Follow-up Submission		YES	Yes	YES	NO			NO	NO	26	NO		12	12			0		7		Yes	M0	N2	T3	3516			NO	1.41	YES		NO
TCGA-AA-3516-11A	74	29.82.0	Nationwide Children's Hospital	TCGA-AA-3516-F37287	DF185582-7617-426F-8ABA-564EF8A496AD	TCGA-AA-3516	NO					22	1	0	8A2285D9-4163-40CE-BFE2-96C22F21B8FF	Scheduled Follow-up Submission		YES	Yes	YES	NO			NO	NO	26	NO		12	12			0		7		Yes	M0	N2	T3	3516			NO	1.41	YES		NO
TCGA-AA-3975-01A	80	41.78.0	Nationwide Children's Hospital	TCGA-AA-3975-F37945	FA8E3DF4-1413-4B2E-8C89-09093D15E907	TCGA-AA-3975	NO					22	6	0	F6A2CADF-E5DB-4CF8-97ED-77757591BC8E	Scheduled Follow-up Submission	Complete Remission/Response	NO	No	YES	NO			NO	NO	14	NO		12	12			0		0		No	M0	N0	T2	3975		TUMOR FREE	NO		YES	Complete Remission/Response	NO
TCGA-G4-6315-01A	66	116.77.0	Nationwide Children's Hospital	TCGA-G4-6315-F21984	0f586976-8f4b-451e-b96c-5f998705d12f	TCGA-G4-6315	NO		1	YES		22	27	0	B8226FD2-5305-4704-9678-F211099FB6B1	Scheduled Follow-up Submission		NO	No	YES	YES		NO	NO		82	NO		12	1	NO				1		No	M1	N1	T3	6315	YES	TUMOR FREE	YES	43.4	YES		NO
TCGA-CK-4951-01A	79	76.78.0	Nationwide Children's Hospital	TCGA-CK-4951-F9636	a69b950d-1420-422a-8c0a-3ab468e37ffd	TCGA-CK-4951	NO		72	NO		22	29	0	D024FAFB-5E94-4205-A393-FD184E89EDBB			YES	No	YES	NO					30	NO		12	3	NO				0	0	No	M0	N0	T3	4951	NO	TUMOR FREE	NO	6.2	YES		NO
TCGA-AA-3548-01A	71	28.86.0	Nationwide Children's Hospital	TCGA-AA-3548-F37506	63124CE1-05B3-4E7A-B8C1-A08BC2750EBE	TCGA-AA-3548	NO					22	3	0	C8EBC728-9447-4D71-8CDD-8DBDCFAF8F3B	Scheduled Follow-up Submission	Complete Remission/Response	NO	No	YES	NO			NO	NO	23	YES		12	12			0		4		No	M0	N2	T3	3548		TUMOR FREE	YES	55.01	YES	Complete Remission/Response	NO
TCGA-AA-A00R-01A	64	30.80.0	Nationwide Children's Hospital			TCGA-AA-A00R	NO					22		0	237A9FCB-C007-4CB2-B41F-96F1140B626A			YES	No	YES	NO			NO		27	NO		12				3		0		No	M0	N0	T2	A00R				0.34	YES
TCGA-G4-6317-01A	51	116.77.0	Nationwide Children's Hospital	TCGA-G4-6317-F21905	10c5ef89-d062-465e-a0ed-a8eea2794475	TCGA-G4-6317	NO			NO		22	30	0	5543CDB3-0716-4360-91CE-E2A2F72311FF	Scheduled Follow-up Submission		NO	No	YES	YES		NO	YES		109		NO	12	1	NO		0		6		No	MX	N2	T3	6317	NO	TUMOR FREE	YES		YES		NO
TCGA-G4-6317-02A	51	116.77.0	Nationwide Children's Hospital	TCGA-G4-6317-F21905	10c5ef89-d062-465e-a0ed-a8eea2794475	TCGA-G4-6317	NO			NO		22	30	0	5543CDB3-0716-4360-91CE-E2A2F72311FF	Scheduled Follow-up Submission		NO	No	YES	YES		NO	YES		109		NO	12	1	NO		0		6		No	MX	N2	T3	6317	NO	TUMOR FREE	YES		YES		NO
TCGA-F4-6704-01A	60	138.78.0	Nationwide Children's Hospital			TCGA-F4-6704	NO			NO		22		0	FC00DB9E-BC7C-4BBE-856F-1854A7EC5B95			NO	No	YES	NO			YES		18	NO	NO	12				0		13		No	MX	N2b	T3	6704				14.9	YES
TCGA-F4-6704-11A	60	138.78.0	Nationwide Children's Hospital			TCGA-F4-6704	NO			NO		22		0	FC00DB9E-BC7C-4BBE-856F-1854A7EC5B95			NO	No	YES	NO			YES		18	NO	NO	12				0		13		No	MX	N2b	T3	6704				14.9	YES
TCGA-DM-A1D8-01A	50	132.71.0	Nationwide Children's Hospital	TCGA-DM-A1D8-F19077	61D68E12-E4FB-46B0-99BA-D6A6FB4929D8	TCGA-DM-A1D8	YES	Normal				22	2	0	919CBD80-C377-4055-B4FD-4DE87D3F910D	Scheduled Follow-up Submission		NO	No	YES	YES	13	YES			15		NO	12	12		0	0	5	1		No		N1	T3	A1D8					YES
TCGA-D5-5537-01A	83	157.71.0	Nationwide Children's Hospital	TCGA-D5-5537-F58487	D66E0780-F997-47CD-A0C5-2191584254B3	TCGA-D5-5537	NO			YES		22	11	0	F61519E3-A7F3-4CED-8A4E-6D10596518C3	Scheduled Follow-up Submission	Progressive Disease	NO	No	YES	NO			NO	NO	10	NO		12	4			0		7		No	MX	N2	T3	5537	NO	WITH TUMOR	NO		YES	Complete Remission/Response	NO
TCGA-AU-6004-01A	69	116.77.0	Nationwide Children's Hospital	TCGA-AU-6004-F13413	8FDE2AB2-7281-4311-8727-4120B80DA989	TCGA-AU-6004	NO		90	NO		22	14	0	81FDC986-8350-43DA-B1E1-310FB06B5870			YES	No	YES	NO					16	NO		12	5	NO				0	0	No	M0	N0	T2	6004	NO				YES
TCGA-A6-2681-01A	73	76.78.0	Nationwide Children's Hospital	TCGA-A6-2681-F6157	e9c0d412-f246-40d7-bfd6-16d2b194f9cc	TCGA-A6-2681	NO			NO		22	14	0	8858BFFC-983D-4DC2-A3CE-018E560227E6			NO	No	YES	NO					23	NO		12	1	NO		0		0	0	Yes	M0	N0	T3	2681		TUMOR FREE	NO	2.4	YES		NO
TCGA-A6-2681-11A	73	76.78.0	Nationwide Children's Hospital	TCGA-A6-2681-F6157	e9c0d412-f246-40d7-bfd6-16d2b194f9cc	TCGA-A6-2681	NO			NO		22	14	0	8858BFFC-983D-4DC2-A3CE-018E560227E6			NO	No	YES	NO					23	NO		12	1	NO		0		0	0	Yes	M0	N0	T3	2681		TUMOR FREE	NO	2.4	YES		NO
TCGA-AA-3558-01A	70	28.86.0	Nationwide Children's Hospital	TCGA-AA-3558-F37513	82D8FEFE-9026-45EC-90A6-711F94B11C65	TCGA-AA-3558	NO					22	3	0	7F23F31D-DB9D-4370-92A0-987371C378F4	Scheduled Follow-up Submission	Complete Remission/Response	NO	No	YES	NO			NO	NO	46	NO		12	12			0		0		No	M0	N0	T2	3558		TUMOR FREE	NO		YES	Complete Remission/Response	NO
TCGA-AA-A01R-01A	47	66.81.0	Nationwide Children's Hospital	TCGA-AA-A01R-F37294	00D1DBC1-D0DF-4D5C-BED3-84288E4F04D4	TCGA-AA-A01R	NO					22	1	0	C38C297C-E035-4213-BAD3-302F21DFACE6	Scheduled Follow-up Submission	Partial Remission/Response	NO	No	YES	NO			NO	YES	19	YES		12	12			1		9		No	M0	N2	T3	A01R		WITH TUMOR	YES	1.83	YES	Partial Remission/Response	YES
TCGA-AA-A01R-11A	47	66.81.0	Nationwide Children's Hospital	TCGA-AA-A01R-F37294	00D1DBC1-D0DF-4D5C-BED3-84288E4F04D4	TCGA-AA-A01R	NO					22	1	0	C38C297C-E035-4213-BAD3-302F21DFACE6	Scheduled Follow-up Submission	Partial Remission/Response	NO	No	YES	NO			NO	YES	19	YES		12	12			1		9		No	M0	N2	T3	A01R		WITH TUMOR	YES	1.83	YES	Partial Remission/Response	YES
TCGA-G4-6314-01A	76	116.77.0	Nationwide Children's Hospital	TCGA-G4-6314-F21805	f42fd0c2-7add-45cf-8a01-cab1e3fb9742	TCGA-G4-6314	YES	Normal		YES		22	27	0	5CE8EBDD-CEDA-4C7B-AC15-86F8864375D8	Scheduled Follow-up Submission		NO	No	YES	YES		NO	NO		59	YES		12	1	YES		0		50		Yes	M1	N2	T3	6314	NO	WITH TUMOR	YES		YES		NO
TCGA-G4-6314-11A	76	116.77.0	Nationwide Children's Hospital	TCGA-G4-6314-F21805	f42fd0c2-7add-45cf-8a01-cab1e3fb9742	TCGA-G4-6314	YES	Normal		YES		22	27	0	5CE8EBDD-CEDA-4C7B-AC15-86F8864375D8	Scheduled Follow-up Submission		NO	No	YES	YES		NO	NO		59	YES		12	1	YES		0		50		Yes	M1	N2	T3	6314	NO	WITH TUMOR	YES		YES		NO
TCGA-AA-3664-01A	74	36.83.0	Nationwide Children's Hospital	TCGA-AA-3664-F37521	0C8F1A4A-503F-48E3-9D50-AF76307D0D44	TCGA-AA-3664	NO					22	3	0	043508C1-C59B-4379-9399-142354C2ADEB	Scheduled Follow-up Submission		NO	No	YES	NO			NO	NO	22	NO		12	12			0		0		No	M0	N0	T3	3664			NO	4.22	YES		NO
TCGA-AA-3989-01A	84	41.78.0	Nationwide Children's Hospital	TCGA-AA-3989-F37936	9DC9B43A-5510-4D0C-B38E-36B93205F5C1	TCGA-AA-3989	NO					22	6	0	33CE5A8D-F7F9-44EB-8925-57F0D309DB17	Scheduled Follow-up Submission		YES	No	YES	NO			NO	NO	19	YES		12	12			0		5		No	M1	N2	T3	3989			NO		YES		NO
TCGA-AA-3812-01A	82	36.83.0	Nationwide Children's Hospital	TCGA-AA-3812-F38106	44BB46EE-5F4C-4567-A7FB-F04050C4FFC7	TCGA-AA-3812	NO					22	10	0	3F46DC27-2E93-4C3F-AE45-19E13400B2CC	Scheduled Follow-up Submission	Complete Remission/Response	NO	No	YES	NO			NO	NO	13	YES		12	12			0		0		No	M0	N0	T3	3812		TUMOR FREE	NO	1.52	YES	Complete Remission/Response	NO
TCGA-CK-5914-01A	81	89.77.0	Nationwide Children's Hospital	TCGA-CK-5914-F39696	626CA4B2-7AFA-488C-BF0D-0EF08F525251	TCGA-CK-5914	NO		25	NO		22	30	0	4770CDD6-6AC6-4687-9496-DA9762435710	Scheduled Follow-up Submission		NO	No	YES	NO				YES		NO		12	1	NO						No	MX	N1	T3	5914	NO
TCGA-AA-A00Z-01A	70	30.80.0	Nationwide Children's Hospital	TCGA-AA-A00Z-F37311	2CD8A5D2-EF19-4961-B1BD-CA6728FD960C	TCGA-AA-A00Z	NO					22	1	0	8F2F5DC2-8BA7-4899-BB74-3DB7B8CC7AB5	Scheduled Follow-up Submission	Complete Remission/Response	YES	No	YES	NO			NO	NO	37	YES		12	12			0		0		Yes	M0	N0	T3	A00Z		TUMOR FREE	NO	1.18	YES	Complete Remission/Response	NO
TCGA-NH-A8F7-01A	53	422.38.0	Nationwide Children's Hospital	TCGA-NH-A8F7-F67150	54FAA61A-7D39-43D3-B225-321889A5200E	TCGA-NH-A8F7	NO			NO		22	31	0	4C914635-7CB8-43DF-A1E0-12861169506E	Scheduled Follow-up Submission		NO	No	YES	YES		NO	YES	NO	18	NO	NO	12	10	NO		0		0	0	Yes, History of Synchronous/Bilateral Malignancy	MX	N0	T3	A8F7	NO	WITH TUMOR	YES	100.3	YES	Partial Remission/Response	YES
TCGA-NH-A8F7-06A	53	422.38.0	Nationwide Children's Hospital	TCGA-NH-A8F7-F67150	54FAA61A-7D39-43D3-B225-321889A5200E	TCGA-NH-A8F7	NO			NO		22	31	0	4C914635-7CB8-43DF-A1E0-12861169506E	Scheduled Follow-up Submission		NO	No	YES	YES		NO	YES	NO	18	NO	NO	12	10	NO		0		0	0	Yes, History of Synchronous/Bilateral Malignancy	MX	N0	T3	A8F7	NO	WITH TUMOR	YES	100.3	YES	Partial Remission/Response	YES
TCGA-CM-6164-01A	46	89.77.0	Nationwide Children's Hospital	TCGA-CM-6164-F13931	32e44f95-df79-479b-8377-39d4a3aaabe8	TCGA-CM-6164	NO			NO		22	19	0	702DE5B4-A324-451E-825C-E8778DFD0F3F	Scheduled Follow-up Submission		NO	No	YES	NO			YES		14	NO		12	7	NO		1		0		No	M0	N0	T3	6164	YES	TUMOR FREE	NO	9.6	YES		NO
TCGA-AD-6901-01A	78	157.71.0	Nationwide Children's Hospital	TCGA-AD-6901-F47111	B92E9923-B382-4122-ADDC-0DA7859F0A80	TCGA-AD-6901	NO		1	NO		22	22	0	6E0CF11E-2B68-4D4F-AA8A-17897710E469	Scheduled Follow-up Submission	Progressive Disease		No	YES	NO			NO	NO	19	NO		12	8	NO				0		No	MX	N0	T3	6901		WITH TUMOR	YES	5.9	YES	Complete Remission/Response	NO
TCGA-AA-A01Q-01A	48	30.80.0	Nationwide Children's Hospital			TCGA-AA-A01Q	NO					22		0	BC7E21BE-869B-4373-91E6-267F2C95DD16			NO	No	YES	NO			NO		16	YES		12				1		0		No	M0	N0	T3	A01Q				1.88	YES
TCGA-AA-3862-01A	82	41.78.0	Nationwide Children's Hospital	TCGA-AA-3862-F37995	D6F7944F-1E66-4166-B9E6-1B9EFDD9DB90	TCGA-AA-3862	NO					22	8	0	DEAA1C69-A42E-4D2A-B8BA-951BD1876BFF	Scheduled Follow-up Submission	Complete Remission/Response	NO	No	YES	NO			NO	NO	16	YES		12	12			0		0		Yes	M0	N0	T3	3862		TUMOR FREE	NO		YES	Complete Remission/Response	NO
TCGA-CM-6162-01A	48	89.77.0	Nationwide Children's Hospital	TCGA-CM-6162-F13927	b510abb2-c59c-4638-b0eb-4bb40c02d62b	TCGA-CM-6162	NO			YES		22	19	0	B322918B-F5A7-4AA6-BC5F-8EAD88143583	Scheduled Follow-up Submission		NO	No	YES	NO			YES		46	YES		12	7	NO		1		1		No	M0	N1a	T3	6162	YES	TUMOR FREE	YES	1.1	YES		NO
TCGA-DM-A28K-01A	75	154.69.0	Nationwide Children's Hospital	TCGA-DM-A28K-F19070	6DC528BD-12EA-4A66-907A-29EB3EACD41B	TCGA-DM-A28K	NO					22	5	0	3D4159BC-FBAD-408C-B2E9-2F95529C4DA9	Scheduled Follow-up Submission		NO	No	YES	NO					17	NO	NO	12	12		0	0	10	0		No	M0	N0	T3	A28K					YES
TCGA-AA-3521-01A	87	28.86.0	Nationwide Children's Hospital			TCGA-AA-3521	NO					22		0	CCB18272-7E68-4F20-AF02-EEC586844C20			YES	No	YES	NO			NO		22	NO		12				0		0		Yes	M0	N0	T3	3521				0.99	YES
TCGA-AA-3521-11A	87	28.86.0	Nationwide Children's Hospital			TCGA-AA-3521	NO					22		0	CCB18272-7E68-4F20-AF02-EEC586844C20			YES	No	YES	NO			NO		22	NO		12				0		0		Yes	M0	N0	T3	3521				0.99	YES
TCGA-AZ-5407-01A	51	116.77.0	Nationwide Children's Hospital	TCGA-AZ-5407-F32208	3c864783-4302-4f29-85eb-edb63028df3d	TCGA-AZ-5407						22	18	0	36D27C18-5E53-4F10-BDFC-0B000AABD436	Scheduled Follow-up Submission			No	YES				YES		16	NO	NO	12	5	NO		0		0		No	M0	N0	T1	5407		TUMOR FREE	NO		YES		NO
TCGA-AA-3525-01A	90	29.82.0	Nationwide Children's Hospital	TCGA-AA-3525-F37306	95AC1AA9-E012-4D2A-91DC-9DDB8A973FFA	TCGA-AA-3525	NO					22	1	0	5185D74B-7229-4EDC-B781-5665FED5C6DE	Scheduled Follow-up Submission	Partial Remission/Response	NO	No	YES	NO			NO	NO	28	NO		12	12			0		2		Yes	M0	N1	T3	3525		TUMOR FREE	NO	11.14	YES	Partial Remission/Response	NO
TCGA-AA-3525-11A	90	29.82.0	Nationwide Children's Hospital	TCGA-AA-3525-F37306	95AC1AA9-E012-4D2A-91DC-9DDB8A973FFA	TCGA-AA-3525	NO					22	1	0	5185D74B-7229-4EDC-B781-5665FED5C6DE	Scheduled Follow-up Submission	Partial Remission/Response	NO	No	YES	NO			NO	NO	28	NO		12	12			0		2		Yes	M0	N1	T3	3525		TUMOR FREE	NO	11.14	YES	Partial Remission/Response	NO
TCGA-QG-A5YW-01A	55	300.56.0	Nationwide Children's Hospital	TCGA-QG-A5YW-F58609	7B1A87B7-6636-4298-8E71-2668C157A716	TCGA-QG-A5YW	NO		165	NO		22	16	0	9F2818BC-A6A4-4C5C-B47C-4C1A19D3CC97	Scheduled Follow-up Submission		NO	No	YES	NO			YES	NO	15	NO		12	4	YES		0		11		No	MX	N2b	T3	A5YW	NO	TUMOR FREE	YES	11.37	YES	Complete Remission/Response	NO
TCGA-AY-A69D-01A	55	385.43.0	Nationwide Children's Hospital	TCGA-AY-A69D-F59400	442544BB-0F7A-43E1-8E08-80D969458C49	TCGA-AY-A69D	NO			NO		22	12	0	6D32BE60-9AB1-457E-B8DD-7CF36049B622	Scheduled Follow-up Submission	Complete Remission/Response	NO	No	YES	NO			YES	NO	25	NO	NO	12	5	NO		0		0		No	M0	N0	T3	A69D	NO	TUMOR FREE	NO	1	YES	Complete Remission/Response	NO
TCGA-CM-5862-01A	80	89.77.0	Nationwide Children's Hospital	TCGA-CM-5862-F13893	0a2f9eca-03b6-43fc-9ca1-2dc3a74df57e	TCGA-CM-5862	YES	Normal		YES		22	18	0	59365C9B-7333-4CAD-97EB-B360D08F06D3	Scheduled Follow-up Submission		NO	No	YES	YES		NO	NO		24	NO		12	7	YES		0		1		No	M1a	N1a	T3	5862	NO	WITH TUMOR	NO	10	YES		NO
TCGA-CM-5341-01A	82	76.78.0	Nationwide Children's Hospital	TCGA-CM-5341-F5924	0058a4df-fac6-459e-80cf-70ea5009daea	TCGA-CM-5341	NO			NO		22	10	0	6DCA75C4-01A9-49B7-8332-E2750FDCF432			YES	No	YES	NO			NO		18	YES		12	1	NO		0		1		No	M0	N1a	T2	5341	NO	TUMOR FREE	YES	16.7	YES		NO
TCGA-A6-6781-01A	43	157.71.0	Nationwide Children's Hospital	TCGA-A6-6781-F29216	e8050064-6641-462c-af41-0d85d0c12b58	TCGA-A6-6781	NO			YES		22	12	0	6B33CDB5-6BC0-44D0-82E8-321B47333A2F				No	YES	NO			NO		30	YES		12	3	NO				2		No	MX	N1b	T4b	6781		TUMOR FREE	YES	6.5	YES		NO
TCGA-A6-6781-01B	43	157.71.0	Nationwide Children's Hospital	TCGA-A6-6781-F29216	e8050064-6641-462c-af41-0d85d0c12b58	TCGA-A6-6781	NO			YES		22	12	0	6B33CDB5-6BC0-44D0-82E8-321B47333A2F				No	YES	NO			NO		30	YES		12	3	NO				2		No	MX	N1b	T4b	6781		TUMOR FREE	YES	6.5	YES		NO
TCGA-CM-5344-01A	39	116.77.0	Nationwide Children's Hospital	TCGA-CM-5344-F11071	20db41d8-690b-4408-b7a6-2841532b3874	TCGA-CM-5344	NO			YES		22	3	0	CDB6D780-AC45-4A58-B43C-369C2623ED79			YES	No	YES	NO			YES		108	YES	NO	12	5	NO	0	0	5	3		No	M0	N1b	T3	5344	YES	TUMOR FREE	YES	1.9	YES		NO
TCGA-A6-6653-01A	82	123.74.0	Nationwide Children's Hospital	TCGA-A6-6653-F21300	0fc8c732-c324-4f90-99ab-3dee80a99ba4	TCGA-A6-6653	YES	Abnormal		NO		22	7	0	78AE997B-2BF5-41D0-8D05-9FA9E704896E			YES	No	YES	NO			YES		12	NO	YES	12	2	NO	5	0	5	0		No	M0	N0	T2	6653		TUMOR FREE	NO	2.5	YES		NO
TCGA-AA-A02F-01A	68	33.79.0	Nationwide Children's Hospital	TCGA-AA-A02F-F37284	B2DD90E7-DAE0-4B5B-B680-86B485017428	TCGA-AA-A02F	NO					22	1	0	8FDEBC4A-E7E3-4595-9F16-0335898D19D7	Scheduled Follow-up Submission	Partial Remission/Response	NO	No	YES	NO			NO	NO	12	YES		12	12			0		1		No	M1	N1	T3	A02F		WITH TUMOR	YES	2.49	YES	Partial Remission/Response	NO
TCGA-AA-3856-01A	59	36.83.0	Nationwide Children's Hospital			TCGA-AA-3856	NO					22		0	61DA20D1-5376-4D53-8F8E-BE2EFFA48DAD			YES	No	YES	NO			NO		13	YES		12				0		0		No	M0	N0	T3	3856					YES
TCGA-AA-A01X-01A	80	66.81.0	Nationwide Children's Hospital	TCGA-AA-A01X-F37291	DA968E56-35F5-4A1E-AE22-FCE41C38D5AC	TCGA-AA-A01X	NO					22	1	0	492E0D2E-74BF-4A32-9F73-9E6617167FF5	Scheduled Follow-up Submission		YES	No	YES	NO			NO	NO	14	YES		12	12			0		2		No	M0	N1	T2	A01X		WITH TUMOR	NO	11.08	YES		NO
TCGA-AA-A01X-11A	80	66.81.0	Nationwide Children's Hospital	TCGA-AA-A01X-F37291	DA968E56-35F5-4A1E-AE22-FCE41C38D5AC	TCGA-AA-A01X	NO					22	1	0	492E0D2E-74BF-4A32-9F73-9E6617167FF5	Scheduled Follow-up Submission		YES	No	YES	NO			NO	NO	14	YES		12	12			0		2		No	M0	N1	T2	A01X		WITH TUMOR	NO	11.08	YES		NO
TCGA-AA-3818-01A	78	36.83.0	Nationwide Children's Hospital			TCGA-AA-3818	NO					22		0	3EC2A161-D919-4BA1-929A-66F9C00AF4EC			NO	No	YES	NO			NO		18	NO		12				0		0		No	M0	N0	T3	3818				3.79	YES
TCGA-DM-A1DA-01A	71	132.71.0	Nationwide Children's Hospital	TCGA-DM-A1DA-F19080	C60647C0-0763-4233-8BCE-A2507FFEC411	TCGA-DM-A1DA	YES	Normal				22	2	0	0A3227C8-0F9F-4184-A215-1EE82BBBA3FF	Scheduled Follow-up Submission			No	YES	YES		NO			13		NO	12	12		1	0	5	5		No	M0	N2	T3	A1DA					YES
TCGA-RU-A8FL-01A	51	385.43.0	Nationwide Children's Hospital	TCGA-RU-A8FL-F56044	812A0A9A-C44E-42EF-B200-38EED15CB539	TCGA-RU-A8FL	NO		65	NO		22	13	0	709615F4-712A-4C91-8174-0F29353C4C0D		Progressive Disease	NO	No	YES	YES		NO	NO	NO	21		NO	12	11	NO		0		5		No	MX	N2a	T3	A8FL		WITH TUMOR	YES	24.6	YES	Partial Remission/Response	NO
TCGA-A6-2682-01A	70	76.78.0	Nationwide Children's Hospital	TCGA-A6-2682-F6913	9a6eede3-4bca-4aab-afad-6f2fe8c79211	TCGA-A6-2682	NO			NO		22	2	0	0CD7B9D0-471A-444B-8F48-D36E3449A7DF			YES	No	YES	YES	12	YES			13	YES		12	2	YES		0		2		Yes	M1	N1	T4b	2682		WITH TUMOR	YES	2.8	YES		NO
TCGA-A6-2682-11A	70	76.78.0	Nationwide Children's Hospital	TCGA-A6-2682-F6913	9a6eede3-4bca-4aab-afad-6f2fe8c79211	TCGA-A6-2682	NO			NO		22	2	0	0CD7B9D0-471A-444B-8F48-D36E3449A7DF			YES	No	YES	YES	12	YES			13	YES		12	2	YES		0		2		Yes	M1	N1	T4b	2682		WITH TUMOR	YES	2.8	YES		NO
TCGA-G4-6303-01A	54	123.74.0	Nationwide Children's Hospital	TCGA-G4-6303-F21450	b4f1d500-2d0c-4ab4-8ec2-d35eb74d483f	TCGA-G4-6303	NO			YES		22	20	0	2D9C6AA7-A6A1-4F21-88BF-FE3A69B5D472	Scheduled Follow-up Submission		NO	No	YES	YES		NO	NO		25	YES		12	1	YES		0		1		No	M1	N1	T3	6303	NO	WITH TUMOR	NO	3.8	YES		NO
TCGA-A6-6654-01A	65	138.78.0	Nationwide Children's Hospital	TCGA-A6-6654-F29546	31b87b18-a612-40b9-b2ff-9bd5c7060d6b	TCGA-A6-6654	NO					22	22	0	BDF314DB-08B5-4024-9E6D-045537F638AA			YES	No	YES	NO			YES		65	YES	NO	12	3	YES	0	0	5	1		No	M0	N1	T3	6654		TUMOR FREE	YES	2.7	YES		NO
TCGA-A6-5667-01A	40	116.77.0	Nationwide Children's Hospital	TCGA-A6-5667-F13411	653617e8-af70-4eca-9a56-5c65f4886720	TCGA-A6-5667	NO			NO		22	27	0	EF60F5CC-FE3F-417F-9E94-377F864C9F13				No	YES	NO			YES		48	YES	NO	12	6	NO	0	0	4	1		No	MX	N1a	T3	5667		TUMOR FREE	YES	36.3	YES		NO
TCGA-A6-5667-11A	40	116.77.0	Nationwide Children's Hospital	TCGA-A6-5667-F13411	653617e8-af70-4eca-9a56-5c65f4886720	TCGA-A6-5667	NO			NO		22	27	0	EF60F5CC-FE3F-417F-9E94-377F864C9F13				No	YES	NO			YES		48	YES	NO	12	6	NO	0	0	4	1		No	MX	N1a	T3	5667		TUMOR FREE	YES	36.3	YES		NO
TCGA-CM-4746-01A	61	76.78.0	Nationwide Children's Hospital	TCGA-CM-4746-F5911	11f25ab3-669e-4212-87a2-45abecc6544a	TCGA-CM-4746	NO			YES		22	10	0	A08E2005-5988-4EEE-A1D9-1906C16F2F98			YES	No	YES	NO			NO		17	NO		12	1	NO		0		0		No	M0	N0	T2	4746	NO	TUMOR FREE	NO	2.2	YES		NO
TCGA-AD-A5EK-01A	51	300.56.0	Nationwide Children's Hospital	TCGA-AD-A5EK-F66010	807FD883-0A18-4540-A30F-14BC7E8A1839	TCGA-AD-A5EK	NO		15	YES		22	1	0	60E1C5F6-CC71-4BE5-8424-4A1644F23283	Scheduled Follow-up Submission	Complete Remission/Response	YES	No	YES	NO			YES	NO	11		NO	12	10	NO		0		0		No	MX	N0	T2	A5EK	NO	TUMOR FREE	NO	1.2	YES	Complete Remission/Response	NO
TCGA-G4-6627-01A	84	123.74.0	Nationwide Children's Hospital	TCGA-G4-6627-F21881	1ad40290-930c-4541-b61a-b5d2b8c00efe	TCGA-G4-6627	NO		6	YES		22	2	0	F749D1EA-2A8E-4E64-ADF3-B6A476E19983	Scheduled Follow-up Submission		NO	No	YES	NO			NO		16	NO		12	2	NO		1		0		No	M0	N0	T3	6627	NO	TUMOR FREE	NO	1.8	YES		NO
TCGA-AA-3955-01A	38	41.78.0	Nationwide Children's Hospital	TCGA-AA-3955-F37979	9B65EC20-49D8-46CA-A6D0-5A0B54E49744	TCGA-AA-3955	NO					22	8	0	56B6AE47-0E99-48C4-B304-010350D42761	Scheduled Follow-up Submission	Complete Remission/Response	YES	No	YES	NO			NO	NO	31	YES		12	12			0		5		No	M0	N2a	T2	3955		TUMOR FREE	YES		YES	Complete Remission/Response	NO
TCGA-AA-3538-01A	54	28.86.0	Nationwide Children's Hospital	TCGA-AA-3538-F37321	2C6C369F-484B-4390-ACD6-1315EB98EC40	TCGA-AA-3538	NO					22	1	0	464C534C-A649-410F-A141-07879CCC3785	Scheduled Follow-up Submission	Complete Remission/Response	NO	No	YES	NO			NO	NO	26	NO		12	12			0		0		No	M0	N0	T2	3538		TUMOR FREE	NO	5.84	YES	Complete Remission/Response	NO
TCGA-CK-5912-01A	81	89.77.0	Nationwide Children's Hospital	TCGA-CK-5912-F39300	6B9AC565-5657-47A8-AE67-657A6BD77FA2	TCGA-CK-5912	NO		140	YES		22	30	0	F98F1AAC-1524-4CC6-BE2C-CB5D5106E463	Scheduled Follow-up Submission		NO	No	YES	NO				NO		NO		12	1	NO						Yes	MX	N0	T2	5912	NO		NO	1.3		Complete Remission/Response	NO
TCGA-CM-4750-01A	34	76.78.0	Nationwide Children's Hospital	TCGA-CM-4750-F9913	b016c66b-e66a-42b2-91df-5c97284dabe1	TCGA-CM-4750	NO		4	YES		22	24	0	4A1E64CC-129B-4AA6-B74D-A6A4FC49F84A			YES	No	YES	NO			YES		52	YES		12	1	NO		0		2		No	M0	N1b	T1	4750	NO	TUMOR FREE	YES	1	YES		NO
TCGA-AU-3779-01A	80	116.77.0	Nationwide Children's Hospital	TCGA-AU-3779-F43364	ADD6727D-E925-44B7-A783-A73B0DE32940	TCGA-AU-3779	NO		35	NO		22	20	0	070F3F83-1B41-4C3F-B495-1D9F970613D4	Scheduled Follow-up Submission		YES	No	YES	NO			NO	NO	21	NO	NO	12	5	NO		0	0	0	0	No	M0	N0	T3	3779	NO		NO		YES		NO
TCGA-AA-3519-01A	63	28.86.0	Nationwide Children's Hospital	TCGA-AA-3519-F37293	F4BE0EA6-7463-4E03-A667-39E8FF29CE0C	TCGA-AA-3519	NO					22	1	0	FA607C7F-7107-47BF-8FB0-235F6757A096	Scheduled Follow-up Submission	Complete Remission/Response	YES	No	YES	NO			NO	NO	43	NO		12	12			0		3		No	M0	N1	T3	3519		TUMOR FREE	NO	1.26	YES	Complete Remission/Response	NO
TCGA-AA-3519-11A	63	28.86.0	Nationwide Children's Hospital	TCGA-AA-3519-F37293	F4BE0EA6-7463-4E03-A667-39E8FF29CE0C	TCGA-AA-3519	NO					22	1	0	FA607C7F-7107-47BF-8FB0-235F6757A096	Scheduled Follow-up Submission	Complete Remission/Response	YES	No	YES	NO			NO	NO	43	NO		12	12			0		3		No	M0	N1	T3	3519		TUMOR FREE	NO	1.26	YES	Complete Remission/Response	NO
TCGA-AA-A00D-01A	70	30.80.0	Nationwide Children's Hospital	TCGA-AA-A00D-F37925	9ACDD043-F212-4F96-AEF3-F58040EDEE2B	TCGA-AA-A00D	NO					22	6	0	1CC3262B-0EB1-4A71-A227-70FF2D74FBE5	Scheduled Follow-up Submission	Complete Remission/Response	YES	No	YES	NO			NO	NO	28	NO		12	12			0		0		No	M0	N0	T2	A00D		TUMOR FREE	NO	1.02	YES	Complete Remission/Response	NO
TCGA-D5-6932-01A	69	157.71.0	Nationwide Children's Hospital	TCGA-D5-6932-F29862	790E3205-F033-455F-8318-57634526CFA3	TCGA-D5-6932	NO			YES		22	29	0	77DE4F7D-1354-42C0-BC6E-94C6CF344BB4	Scheduled Follow-up Submission		NO	No	YES	NO			NO		11	NO		12	3	NO		0		0		No	M0	N0	T3	6932	YES		NO	3.8	YES		NO
TCGA-G4-6321-01A	60	116.77.0	Nationwide Children's Hospital	TCGA-G4-6321-F21916	fe9a60d5-5c9b-4650-95dd-92820bf57f9f	TCGA-G4-6321	NO		110	YES		22	30	0	DA564405-BED0-4356-B4E1-05F6E3E684DC	Scheduled Follow-up Submission		YES	No	YES	NO			YES		44	NO	YES	12	1	NO		0		3		Yes	MX	N1	T2	6321	NO	TUMOR FREE	YES	3.4	YES		NO
TCGA-DM-A1DB-01A	68	132.71.0	Nationwide Children's Hospital	TCGA-DM-A1DB-F19082	195A04DA-878F-47BB-969C-1461D9C4FEA2	TCGA-DM-A1DB	YES	Normal				22	2	0	8918AAF4-AFD0-450D-BBB2-E50601B25AFE	Scheduled Follow-up Submission			No	YES	YES		NO			7	NO	NO	12	12		1	0	5	0		No	M0	N0	T3	A1DB					YES
TCGA-AA-3672-01A	90	36.83.0	Nationwide Children's Hospital	TCGA-AA-3672-F37523	2FB64AB5-5FC7-4A29-A92B-826B4A5E9CE4	TCGA-AA-3672	NO					22	3	0	7060758D-227A-4098-A89F-1E25D2F5292E	Scheduled Follow-up Submission		NO	No	YES	NO			NO	NO	21	NO		12	12			0		4		Yes	M0	N1	T3	3672		TUMOR FREE	NO	1.27	YES		NO
TCGA-F4-6806-01A	59	138.78.0	Nationwide Children's Hospital	TCGA-F4-6806-F35082	7167D161-1831-4A9E-81D8-75818C0CF5F9	TCGA-F4-6806	NO			NO		22	27	0	2C01D99D-E209-4A22-B670-073A1E1DFF31	Scheduled Follow-up Submission	Complete Remission/Response	NO	No	YES	NO			NO	NO	5	NO	NO	12	9	NO	0		0	0	0	No	M0	N0	T2	6806	NO	TUMOR FREE	YES		YES	Complete Remission/Response	NO
TCGA-AD-6899-01A	84	157.71.0	Nationwide Children's Hospital	TCGA-AD-6899-F47188	1C49AF32-BFF3-4B1C-96B5-4BE89D2C0AB5	TCGA-AD-6899			1	NO		22	22	0	BBF04AB7-BE17-4370-AF3C-2F8936646B28	Scheduled Follow-up Submission	Complete Remission/Response	NO	No	YES	NO				NO	20	YES		12	8	NO		0		17		No	MX	N2b	T4a	6899		TUMOR FREE	NO	6.1	YES	Complete Remission/Response	NO
TCGA-CM-6167-01A	57	89.77.0	Nationwide Children's Hospital	TCGA-CM-6167-F13937	d46c7031-cf91-4f95-843b-d7b96a01aa12	TCGA-CM-6167	NO			YES		22	19	0	057A2887-EE24-4349-B665-9E07D086F261	Scheduled Follow-up Submission		NO	No	YES	NO			YES		40	YES		12	7	YES		0		11		No	M0	N2b	T3	6167	YES	TUMOR FREE	YES	5.5	YES		NO
TCGA-AA-3950-01A	79	41.78.0	Nationwide Children's Hospital	TCGA-AA-3950-F37980	F6FB6CCD-DAA1-4F96-A6EC-A69815E2AB1D	TCGA-AA-3950	NO					22	8	0	2982297C-9BCD-4E04-A1AB-F7815035A6CB	Scheduled Follow-up Submission	Complete Remission/Response	NO	No	YES	NO			NO	NO	17	NO		12	12			2		0		Yes	M0	N0	T3	3950		TUMOR FREE	NO		YES	Complete Remission/Response	NO
TCGA-F4-6570-01A	78	123.74.0	Nationwide Children's Hospital	TCGA-F4-6570-F29806	2BFF0D84-1719-401B-9A98-83D0477A9CD7	TCGA-F4-6570	NO					22	29	0	1F6D6164-6F33-4EE1-A2F2-9B709B511ABA	Scheduled Follow-up Submission			No	YES	NO					16	NO		12	3	NO		0		0	0	No	M0	N0	T3	6570	NO	TUMOR FREE	NO		YES		NO
TCGA-DM-A28C-01A	74	154.69.0	Nationwide Children's Hospital	TCGA-DM-A28C-F19041	5E611E2B-F4B7-4940-95A5-D4744C57536A	TCGA-DM-A28C	NO			YES		22	2	0	73F12B29-7438-447E-B049-7079267709F5	Scheduled Follow-up Submission		NO	No	YES	NO					11			12	12		0	1	0	0		No	M0	N0	T3	A28C					YES
TCGA-A6-2675-01A	78	116.77.0	Nationwide Children's Hospital	TCGA-A6-2675-F13533	a2ead2c9-c7e6-40a7-9b9e-d0695b739978	TCGA-A6-2675	NO			NO		22	18	0	D604A45F-B417-4274-827E-48398CC1C459			NO	No	YES	NO			NO		11	NO		12	7	NO		2		0		No	MX	N0	T3	2675		TUMOR FREE	NO		YES		NO
TCGA-A6-2675-11A	78	116.77.0	Nationwide Children's Hospital	TCGA-A6-2675-F13533	a2ead2c9-c7e6-40a7-9b9e-d0695b739978	TCGA-A6-2675	NO			NO		22	18	0	D604A45F-B417-4274-827E-48398CC1C459			NO	No	YES	NO			NO		11	NO		12	7	NO		2		0		No	MX	N0	T3	2675		TUMOR FREE	NO		YES		NO
TCGA-AA-3518-01A	81	29.82.0	Nationwide Children's Hospital			TCGA-AA-3518	NO					22		0	CFC45DF4-7BD9-43BC-806B-264A60ACCB9E			YES	No	YES	NO			NO		27	NO		12				0		0		No	M0	N0	T3	3518				1.48	YES
TCGA-AA-3518-11A	81	29.82.0	Nationwide Children's Hospital			TCGA-AA-3518	NO					22		0	CFC45DF4-7BD9-43BC-806B-264A60ACCB9E			YES	No	YES	NO			NO		27	NO		12				0		0		No	M0	N0	T3	3518				1.48	YES
TCGA-AA-3517-01A	60	28.86.0	Nationwide Children's Hospital	TCGA-AA-3517-F37289	C1D7F57B-5339-487C-934B-91305B8E0B01	TCGA-AA-3517	NO					22	1	0	93B36D64-A699-4AEC-AE7F-118A39558661	Scheduled Follow-up Submission	Complete Remission/Response	YES	No	YES	NO			NO	NO	54	NO		12	12			0		0		No	M0	N0	T3	3517		TUMOR FREE	YES	1.23	YES	Complete Remission/Response	NO
TCGA-AA-3517-11A	60	28.86.0	Nationwide Children's Hospital	TCGA-AA-3517-F37289	C1D7F57B-5339-487C-934B-91305B8E0B01	TCGA-AA-3517	NO					22	1	0	93B36D64-A699-4AEC-AE7F-118A39558661	Scheduled Follow-up Submission	Complete Remission/Response	YES	No	YES	NO			NO	NO	54	NO		12	12			0		0		No	M0	N0	T3	3517		TUMOR FREE	YES	1.23	YES	Complete Remission/Response	NO
TCGA-AY-A8YK-01A	44	422.38.0	Nationwide Children's Hospital	TCGA-AY-A8YK-F70633	35FF010C-C88E-44BF-ABFC-F936C4474116	TCGA-AY-A8YK	NO			NO		22	26	0	FA75E0F1-AD8C-45DD-917A-1C8C24F5DEBB	Scheduled Follow-up Submission	Complete Remission/Response	NO	No	YES	NO			YES	NO	24	YES	NO	12	2	NO		0		6		No	M1	N2a	T3	A8YK	NO	TUMOR FREE	YES	5.9	YES	Complete Remission/Response	NO
TCGA-AY-5543-01A	65	89.77.0	Nationwide Children's Hospital	TCGA-AY-5543-F19913	cf329ba5-376f-4a12-bdac-b79cc97cf52f	TCGA-AY-5543	NO			NO		22	4	0	6C598A01-8D73-4950-954F-359C0EA11224			NO	No	YES	NO					24	NO	NO	12	1	YES		0		1		No	M1	N1a	T3	5543	NO	TUMOR FREE	YES		YES		NO
TCGA-D5-6531-01A	75	116.77.0	Nationwide Children's Hospital	TCGA-D5-6531-F28622	b98f9c34-3631-493a-81d5-b49fe9ffe73f	TCGA-D5-6531						22	27	0	D6C235F0-6095-47F7-BF3E-478F80A923E6	Scheduled Follow-up Submission		NO	No	YES	NO			NO		4	NO		12	2	NO				0	0	No	M0	N0	T3	6531	NO	TUMOR FREE	NO	1.9	YES		NO
TCGA-AA-A00E-01A	65	30.80.0	Nationwide Children's Hospital	TCGA-AA-A00E-F37929	EAA0C903-F259-42FE-B068-C337AAADC9CF	TCGA-AA-A00E	NO					22	6	0	6EF72430-0CA6-4E6E-8A85-A64AA3F3AABE	Scheduled Follow-up Submission	Complete Remission/Response	NO	No	YES	NO			NO	NO	41	NO		12	12			0		0		No	M0	N0	T3	A00E		TUMOR FREE	NO	10.56	YES	Complete Remission/Response	NO
TCGA-AA-3688-01A	80	36.83.0	Nationwide Children's Hospital	TCGA-AA-3688-F38093	E1BC44E9-B580-412A-ACA6-1C7EAF2A713F	TCGA-AA-3688	NO					22	10	0	601B8015-AF63-4CCE-B008-0351DD4FA310	Scheduled Follow-up Submission	Progressive Disease	NO	No	YES	NO			NO	NO	13	YES		12	12			1		2		Yes	M1	N1	T3	3688		WITH TUMOR	NO	47.45	YES	Progressive Disease	NO
TCGA-A6-6652-01A	59	123.74.0	Nationwide Children's Hospital	TCGA-A6-6652-F30458	7a5cef72-d273-467d-92ef-9bef3e3d1d5e	TCGA-A6-6652	NO			YES		22	19	0	B04F8B8F-6D2C-478C-B4EF-10FC0B3BCD76				No	YES	NO			YES		22	NO	NO	12	4		0	0	5	0		No	M1	N0	T3	6652		WITH TUMOR	YES	4.8	YES		NO
TCGA-CM-4743-01A	69	116.77.0	Nationwide Children's Hospital	TCGA-CM-4743-F6606	115cfd38-5ab8-4f5d-abe3-f04bf8655d6a	TCGA-CM-4743	NO			NO		22	24	0	BE762442-D9FD-44E8-A2E0-49B5A3DD3002			NO	No	YES	NO			NO		27	YES		12	1	NO		0		0		No	M0	N0	T3	4743	NO	TUMOR FREE	YES	4	YES		NO
TCGA-CA-5796-01A	52	89.77.0	Nationwide Children's Hospital	TCGA-CA-5796-F20290	6b8c57bf-a08b-4dd1-a462-d20602837e61	TCGA-CA-5796						22	9	0	ADDBB4DE-588A-4670-9E5F-6F4378892112				No	YES									12	1							No	M0	N0	T3	5796		TUMOR FREE	YES		NO		NO
TCGA-AZ-4615-01A	84	76.78.0	Nationwide Children's Hospital	TCGA-AZ-4615-F19857	c0630af6-c2eb-4c0b-8452-cbb1963a40ee	TCGA-AZ-4615			50			22	30	0	A0264FD0-C03E-42FE-9FC0-125402676942				No	YES	YES		NO			18	YES		12	12			1		1		No	M0	N1	T3	4615	NO	WITH TUMOR	YES	2.1	YES		NO
TCGA-AZ-6599-01A	72	123.74.0	Nationwide Children's Hospital	TCGA-AZ-6599-F34146	EA99C322-2FBC-4A46-B456-B22E30205E6F	TCGA-AZ-6599						22	31	0	6D985917-72BA-4C46-81C1-15AEF4BC3396	Scheduled Follow-up Submission	Complete Remission/Response		No	YES					NO	25	NO		12	7					0		No	MX	N0	T2	6599	NO	TUMOR FREE	NO		YES	Complete Remission/Response	NO
TCGA-AZ-6599-11A	72	123.74.0	Nationwide Children's Hospital	TCGA-AZ-6599-F34146	EA99C322-2FBC-4A46-B456-B22E30205E6F	TCGA-AZ-6599						22	31	0	6D985917-72BA-4C46-81C1-15AEF4BC3396	Scheduled Follow-up Submission	Complete Remission/Response		No	YES					NO	25	NO		12	7					0		No	MX	N0	T2	6599	NO	TUMOR FREE	NO		YES	Complete Remission/Response	NO
TCGA-3L-AA1B-01A	61	385.43.0	Nationwide Children's Hospital	TCGA-3L-AA1B-F67516	8AEC4573-0E07-4BFC-A1A7-FF843D3D447A	TCGA-3L-AA1B	NO			YES		22	6	0	BF669F52-D312-49DA-A2C5-70623DCDC809	Scheduled Follow-up Submission		YES	No	YES	NO			YES	NO	28	NO	NO	12	11	NO		0		0	0	No	M0	N0	T2	AA1B	NO		NO		YES	Complete Remission/Response	NO
TCGA-CK-5915-01A	63	89.77.0	Nationwide Children's Hospital	TCGA-CK-5915-F39695	F6177CAD-6A95-4C97-9576-A851E544A1CC	TCGA-CK-5915	NO			YES		22	30	0	3C0E610B-F17F-458F-83C1-979DD8087FCC	Scheduled Follow-up Submission		YES	No	YES	NO				YES		NO		12	1	NO						No	MX	N0	T2	5915	NO
TCGA-F4-6854-01A	77	157.71.0	Nationwide Children's Hospital	TCGA-F4-6854-F35416	D0EEDBBB-5F9B-4DD4-A2E5-8A42EA4E34B3	TCGA-F4-6854	NO			NO		22	26	0	D4087288-A96D-41AF-B295-BEC7FC7FBF87	Scheduled Follow-up Submission	Complete Remission/Response	NO	No	YES	NO		NO	NO	YES	8	NO		12	9	NO	0		0	0	0	No	M0	N0	T3	6854	NO	TUMOR FREE	NO		YES	Complete Remission/Response	NO
TCGA-AZ-4315-01A	61	76.78.0	Nationwide Children's Hospital	TCGA-AZ-4315-F19854	d385c440-824e-4c54-b439-999e2a62ffed	TCGA-AZ-4315			5			22	29	0	1E6A5324-1D23-4449-A21D-042C81653A7B				No	YES						0	NO		12	12	YES		0				No	M0	N0	T3	4315	NO	TUMOR FREE	NO	1.5	YES		NO
TCGA-AA-A017-01A	57	33.79.0	Nationwide Children's Hospital	TCGA-AA-A017-F37309	55613C48-F696-4E1E-8215-9DAA5B91E579	TCGA-AA-A017	NO					22	1	0	2EEC2AA6-8174-4EDB-999B-5A553DD230F4	Scheduled Follow-up Submission	Complete Remission/Response	NO	No	YES	NO			NO	NO	18	YES		12	12			0		0		No	M0	N0	T3	A017		TUMOR FREE	NO		YES	Complete Remission/Response	NO
TCGA-AZ-4684-01A	49	76.78.0	Nationwide Children's Hospital	TCGA-AZ-4684-F19861	6fd93547-1428-44dd-a46a-42c1afdb9de0	TCGA-AZ-4684			34			22	30	0	B0D5CFCD-06E9-4F56-A8AA-039482D444EE				No	YES						12	YES		12	12	YES				10	10	No	M1	N2	T3	4684		WITH TUMOR	NO	8.9	YES		NO
TCGA-AA-A02H-01A	74	33.79.0	Nationwide Children's Hospital			TCGA-AA-A02H	NO					22		0	D557A1E2-27C4-48DD-B470-324FA67B967A			NO	No	YES	NO			NO		12	YES		12				0		6		No	M1	N2	T3	A02H				1387	YES
TCGA-CM-6676-01A	82	138.78.0	Nationwide Children's Hospital	TCGA-CM-6676-F15608	be3a979e-245a-4e31-9c10-33b9d6044520	TCGA-CM-6676	NO			NO		22	26	0	D8B7E0F4-4D8E-4629-9EBA-1C95B36A8611	Scheduled Follow-up Submission		NO	No	YES	NO			NO		17	YES		12	8	NO		0		0	1	No	M0	N0	T2	6676	NO	TUMOR FREE	NO	4.5	YES		NO
TCGA-AA-A03F-01A	90	66.81.0	Nationwide Children's Hospital	TCGA-AA-A03F-F72573	33151CF1-B174-4AA8-9CC4-41354018B4F6	TCGA-AA-A03F	NO					22	24	0	832FAC8D-2DA4-42C5-B6D6-29709F1016AA	Scheduled Follow-up Submission		NO	No	YES	NO			NO	NO	29			12	7			0		4		No	M0	N2	T3	A03F			NO	1.09	YES		NO
TCGA-AA-A03F-11A	90	66.81.0	Nationwide Children's Hospital	TCGA-AA-A03F-F72573	33151CF1-B174-4AA8-9CC4-41354018B4F6	TCGA-AA-A03F	NO					22	24	0	832FAC8D-2DA4-42C5-B6D6-29709F1016AA	Scheduled Follow-up Submission		NO	No	YES	NO			NO	NO	29			12	7			0		4		No	M0	N2	T3	A03F			NO	1.09	YES		NO
TCGA-A6-5657-01A	65	89.77.0	Nationwide Children's Hospital	TCGA-A6-5657-F12381	2a00b819-eef2-417d-b86f-364469b808cf	TCGA-A6-5657	NO			NO		22	31	0	EBCC28CA-877F-47D2-A1F3-1679DBED7337			NO	No	YES	NO			NO		42	YES		12	5	NO		0		1		No	M0	N1	T3	5657		TUMOR FREE	YES	1.5	YES		NO
TCGA-A6-5657-11A	65	89.77.0	Nationwide Children's Hospital	TCGA-A6-5657-F12381	2a00b819-eef2-417d-b86f-364469b808cf	TCGA-A6-5657	NO			NO		22	31	0	EBCC28CA-877F-47D2-A1F3-1679DBED7337			NO	No	YES	NO			NO		42	YES		12	5	NO		0		1		No	M0	N1	T3	5657		TUMOR FREE	YES	1.5	YES		NO
TCGA-A6-A567-01A	56	300.56.0	Nationwide Children's Hospital	TCGA-A6-A567-F42414	5F11CCA6-115A-4400-B869-884FB7517976	TCGA-A6-A567				YES		22	18	0	35EEA297-CB6A-4DB6-B5D3-B368B1BCC97E	Additional New Tumor Event	Progressive Disease	NO	No	YES	YES				NO	41	YES		12	4	YES		0		3		No	M1	N1	T3	A567		WITH TUMOR	NO	95.8	YES		NO
TCGA-A6-2684-01A	75	76.78.0	Nationwide Children's Hospital	TCGA-A6-2684-F6663	a2305654-87da-4065-ba07-a491bdefd6d9	TCGA-A6-2684	NO			NO		22	24	0	27E8FE24-F274-49D6-8469-7213E1E4AA7D			YES	No	YES	NO					33	NO		12	1	NO		0		0		No	M0	N0	T2	2684		TUMOR FREE	NO		YES		NO
TCGA-A6-2684-01C	75	76.78.0	Nationwide Children's Hospital	TCGA-A6-2684-F6663	a2305654-87da-4065-ba07-a491bdefd6d9	TCGA-A6-2684	NO			NO		22	24	0	27E8FE24-F274-49D6-8469-7213E1E4AA7D			YES	No	YES	NO					33	NO		12	1	NO		0		0		No	M0	N0	T2	2684		TUMOR FREE	NO		YES		NO
TCGA-A6-2684-11A	75	76.78.0	Nationwide Children's Hospital	TCGA-A6-2684-F6663	a2305654-87da-4065-ba07-a491bdefd6d9	TCGA-A6-2684	NO			NO		22	24	0	27E8FE24-F274-49D6-8469-7213E1E4AA7D			YES	No	YES	NO					33	NO		12	1	NO		0		0		No	M0	N0	T2	2684		TUMOR FREE	NO		YES		NO
TCGA-AA-3509-01A	54	76.78.0	Nationwide Children's Hospital	TCGA-AA-3509-F37280	F82867D0-C02A-4BD0-9EDF-21A2F99B3F5D	TCGA-AA-3509	NO					22	1	0	85DE2C7D-E28A-4207-8032-0DEB47165926	Scheduled Follow-up Submission	Complete Remission/Response	NO	No	YES	NO			NO	NO	27	NO		12	12			0		0		No	M0	N0	T3	3509		TUMOR FREE	NO	2.82	YES	Complete Remission/Response	NO
TCGA-AA-3509-11A	54	76.78.0	Nationwide Children's Hospital	TCGA-AA-3509-F37280	F82867D0-C02A-4BD0-9EDF-21A2F99B3F5D	TCGA-AA-3509	NO					22	1	0	85DE2C7D-E28A-4207-8032-0DEB47165926	Scheduled Follow-up Submission	Complete Remission/Response	NO	No	YES	NO			NO	NO	27	NO		12	12			0		0		No	M0	N0	T3	3509		TUMOR FREE	NO	2.82	YES	Complete Remission/Response	NO
TCGA-AA-3506-01A	77	76.78.0	Nationwide Children's Hospital	TCGA-AA-3506-F37277	C40D3DA3-C685-44E7-BB2F-A9479B871988	TCGA-AA-3506	NO					22	1	0	4C90E8CD-0883-47FE-94DE-FDFEB08C0822	Scheduled Follow-up Submission			No	YES	NO			NO	NO	46			12	12			0		0		Yes	M0	N0	T2	3506			NO	2.08	YES		NO
TCGA-AA-3506-11A	77	76.78.0	Nationwide Children's Hospital	TCGA-AA-3506-F37277	C40D3DA3-C685-44E7-BB2F-A9479B871988	TCGA-AA-3506	NO					22	1	0	4C90E8CD-0883-47FE-94DE-FDFEB08C0822	Scheduled Follow-up Submission			No	YES	NO			NO	NO	46			12	12			0		0		Yes	M0	N0	T2	3506			NO	2.08	YES		NO
TCGA-AD-6895-01A	84	157.71.0	Nationwide Children's Hospital	TCGA-AD-6895-F47141	783101A7-E808-4F09-A2E9-5D0BDEF470AE	TCGA-AD-6895	NO		1	NO		22	22	0	E2D4CA85-2A38-4A92-800C-118886105C0B	Scheduled Follow-up Submission	Complete Remission/Response		No	YES	NO			NO	NO	17	YES		12	8	NO		0		1		Yes	M0	N1a	T3	6895		TUMOR FREE	NO		YES	Complete Remission/Response	NO
TCGA-CM-5868-01A	59	89.77.0	Nationwide Children's Hospital	TCGA-CM-5868-F13899	6b4da54c-2e36-46c3-b0d2-73f762416ccd	TCGA-CM-5868	YES	Normal		NO		22	18	0	2B5341C9-940D-4494-882E-9E802F0BAA10	Scheduled Follow-up Submission		NO	No	YES	YES		NO	NO		17	YES		12	7	YES		0		1		No	M1a	N1a	T4a	5868	YES	WITH TUMOR	YES	93	YES		NO
TCGA-D5-5541-01A	63	89.77.0	Nationwide Children's Hospital	TCGA-D5-5541-F13832	2de2e12a-db7f-4273-b7b7-ce76fb26a638	TCGA-D5-5541	NO		36	NO		22	4	0	E92E7B6F-92D0-4C2D-9C43-D2E9BD2BE217	Scheduled Follow-up Submission		NO	No	YES	NO			NO		8	NO		12	7	NO		0		1	0	No	M0	N1a	T3	5541	NO	TUMOR FREE	YES	2.3	YES		NO
TCGA-AA-A00O-01A	83	33.79.0	Nationwide Children's Hospital	TCGA-AA-A00O-F37318	CA52500B-891D-48D2-B9C0-61527674AD59	TCGA-AA-A00O	NO					22	1	0	9C2A7A45-2515-49A3-8277-1DB687B37441	Scheduled Follow-up Submission	Complete Remission/Response	NO	No	YES	NO			NO	NO	40	YES		12	12			0		32		No	M0	N2	T3	A00O			NO	3.25	YES		NO
TCGA-AZ-4616-01A	82	138.78.0	Nationwide Children's Hospital	TCGA-AZ-4616-F19858	7c0436fc-b486-4981-a45d-a209f91e7e77	TCGA-AZ-4616						22	30	0	F9BE6BDA-212C-45E6-BFA7-511BA54C5598				No	YES						23	YES		12	12					13		No	M1	N2	T3	4616	YES	WITH TUMOR	YES		YES		NO
TCGA-AA-3561-01A	72	28.86.0	Nationwide Children's Hospital	TCGA-AA-3561-F37515	CF705B43-4F5B-42BB-8DC6-5B6E7F015D20	TCGA-AA-3561	NO					22	3	0	2F95EAB1-26D3-4F6A-8BD0-C094E6FC1569	Scheduled Follow-up Submission	Complete Remission/Response	YES	No	YES	NO			NO	NO	50	NO		12	12			0				No	M0	N0	T3	3561		TUMOR FREE	NO		YES	Complete Remission/Response	NO
TCGA-AZ-4313-01A	51	76.78.0	Nationwide Children's Hospital	TCGA-AZ-4313-F19853	645fd1e4-91f1-4aac-816c-6846831bd5ce	TCGA-AZ-4313			12			22	29	0	794E4AD5-8BA8-4E13-80B7-08EDB7A0FD9B				No	YES						13	YES		12	12	NO		0		0		Yes	M0	N0	T1	4313	NO	TUMOR FREE	NO	5.9	YES		NO
TCGA-D5-6530-01A	53	116.77.0	Nationwide Children's Hospital	TCGA-D5-6530-F28927	810c037c-fbfe-4fd0-9bda-09511085edda	TCGA-D5-6530	NO		40	NO		22	2	0	60A83767-9045-49DC-AE24-3D7BCF38C10E	Scheduled Follow-up Submission			No	YES	NO					15	NO		12	3	NO				0		No	M0	N0	T2	6530	YES	TUMOR FREE	NO	3.5	YES		NO
TCGA-DM-A282-01A	60	154.69.0	Nationwide Children's Hospital	TCGA-DM-A282-F19063	F8D1B315-42FE-4F86-89FC-739790CD55F9	TCGA-DM-A282	YES	Normal		NO		22	5	0	42083965-AFBE-4031-B9E9-588C63A4BA16	Scheduled Follow-up Submission		NO	No	YES	YES		NO			16	NO	NO	12	12		0	0	5	0		No	M0	N0	T3	A282					YES
TCGA-CA-6715-01A	63	138.78.0	Nationwide Children's Hospital	TCGA-CA-6715-F70873	0386CE41-CC4D-4F0D-89FE-56E3E6574DD8	TCGA-CA-6715						22	10	0	B43628E7-9651-458B-A2CB-1418B8730D4E	Scheduled Follow-up Submission	Complete Remission/Response		No	YES					NO	2			12	3					1		No	M0	N1	T3	6715		TUMOR FREE	YES		YES	Complete Remission/Response	NO
TCGA-AD-6889-01A	76	157.71.0	Nationwide Children's Hospital	TCGA-AD-6889-F47705	B963390E-6F5F-4C35-8A72-0C6A8794954E	TCGA-AD-6889	NO					22	28	0	89B1B018-B260-4BF4-BB98-865895F9FB9E	Scheduled Follow-up Submission	Complete Remission/Response		No	YES	NO			NO	NO	16	NO		12	8			1		0		No	M0	N0	T3	6889		TUMOR FREE	YES	7.5	YES	Complete Remission/Response	NO
TCGA-CK-5916-01A	71	89.77.0	Nationwide Children's Hospital	TCGA-CK-5916-F39677	979BC2CE-B529-4A5F-9037-AB91E6C3BC2E	TCGA-CK-5916	NO			NO		22	29	0	AFA40EF3-23B5-46CE-9D8A-23C17E797EE2	Scheduled Follow-up Submission	Progressive Disease	YES	No	YES	NO				NO		YES		12	1	NO						No	M0	N0	T1	5916	NO	WITH TUMOR	NO	3.2		Progressive Disease	NO
TCGA-AA-A01I-01A	76	33.79.0	Nationwide Children's Hospital	TCGA-AA-A01I-F37300	ED9F7290-E92C-4628-A0CF-1F9B300F2FE6	TCGA-AA-A01I	NO					22	1	0	87B941D0-DDAA-458F-819C-B4F25AE00CDC	Scheduled Follow-up Submission	Complete Remission/Response	YES	No	YES	NO			NO	NO	36	NO		12	12			0		0		No	M0	N0	T2	A01I		TUMOR FREE	NO		YES	Complete Remission/Response	NO
TCGA-A6-3808-01A	73	41.78.0	Nationwide Children's Hospital	TCGA-A6-3808-F2179	0a57e86e-33d6-40cf-b318-94665c630ef9	TCGA-A6-3808	NO			NO		22	11	0	0C9CB20B-E98D-44EC-8585-EBED2249F535			YES	No	YES	NO			NO		24	NO	NO	12	10	NO	0	0	4	0		No	M0	N0	T3	3808		TUMOR FREE	NO		YES		NO
TCGA-A6-3808-11A	73	41.78.0	Nationwide Children's Hospital	TCGA-A6-3808-F2179	0a57e86e-33d6-40cf-b318-94665c630ef9	TCGA-A6-3808	NO			NO		22	11	0	0C9CB20B-E98D-44EC-8585-EBED2249F535			YES	No	YES	NO			NO		24	NO	NO	12	10	NO	0	0	4	0		No	M0	N0	T3	3808		TUMOR FREE	NO		YES		NO
TCGA-A6-6780-01A	74	138.78.0	Nationwide Children's Hospital	TCGA-A6-6780-F29585	9586e98f-8c22-4669-b122-303b77295180	TCGA-A6-6780	NO			NO		22	23	0	37AA97F9-9BCB-41F3-80C7-75D178F4821F			YES	No	YES	NO					18	NO		12	3	NO		0		0		No	MX	N0	T3	6780		TUMOR FREE	NO		YES		NO
TCGA-A6-6780-01B	74	138.78.0	Nationwide Children's Hospital	TCGA-A6-6780-F29585	9586e98f-8c22-4669-b122-303b77295180	TCGA-A6-6780	NO			NO		22	23	0	37AA97F9-9BCB-41F3-80C7-75D178F4821F			YES	No	YES	NO					18	NO		12	3	NO		0		0		No	MX	N0	T3	6780		TUMOR FREE	NO		YES		NO
TCGA-DM-A1D6-01A	88	132.71.0	Nationwide Children's Hospital	TCGA-DM-A1D6-F19075	A78E9FF2-0513-4D6C-BAF0-B214AF995AC0	TCGA-DM-A1D6	YES	Normal				22	2	0	F2E341FB-ABF6-4A33-B37F-C405E3118716	Scheduled Follow-up Submission		NO	No	YES	YES	12	YES			6	NO	NO	12	12		0	0	5	0		No	M0	N0	T3	A1D6					YES
TCGA-AA-3811-01A	84	41.78.0	Nationwide Children's Hospital	TCGA-AA-3811-F38105	5A316774-DC19-48A9-BAB0-C37335014C2F	TCGA-AA-3811	NO					22	10	0	68E123CB-2CBF-4E1C-98F9-3F8906D29503	Scheduled Follow-up Submission		NO	No	YES	NO			NO	NO	15	YES		12	12			0		5		No	M0	N2	T3	3811			NO	3.4	YES		NO
TCGA-AA-3494-01A	55	76.78.0	Nationwide Children's Hospital			TCGA-AA-3494	NO					22		0	B508C874-31B9-4357-99A9-ACD7A6CF49BA			NO	No	YES	NO			NO		39			12				0		0		No	M1	N0	T3	3494				261.3	YES
TCGA-AA-3494-11A	55	76.78.0	Nationwide Children's Hospital			TCGA-AA-3494	NO					22		0	B508C874-31B9-4357-99A9-ACD7A6CF49BA			NO	No	YES	NO			NO		39			12				0		0		No	M1	N0	T3	3494				261.3	YES
TCGA-CK-6748-01A	45	138.78.0	Nationwide Children's Hospital	TCGA-CK-6748-F14836	7c6318a3-89f9-4a1e-a49c-6a4c2c6c2f4d	TCGA-CK-6748	NO		26	NO		22		0	EA78B602-1566-4FFD-BCE7-1166DCDF81EC			NO	No	YES	YES	12	YES	NO			NO	NO	12	8	NO	0		10			No	M1	N1	T3	6748	NO	WITH TUMOR	NO	400.26			NO
TCGA-AA-A01V-01A	59	66.81.0	Nationwide Children's Hospital			TCGA-AA-A01V	NO					22		0	A32B21EF-8996-43C7-A41A-8E7D8DF65991			NO	No	YES	NO			NO		15			12				0		0		No	M0	N0	T2	A01V				4.09	YES
TCGA-AA-A01V-11A	59	66.81.0	Nationwide Children's Hospital			TCGA-AA-A01V	NO					22		0	A32B21EF-8996-43C7-A41A-8E7D8DF65991			NO	No	YES	NO			NO		15			12				0		0		No	M0	N0	T2	A01V				4.09	YES
TCGA-AA-3994-01A	69	45.80.0	Nationwide Children's Hospital	TCGA-AA-3994-F37935	32EEB948-E325-44CE-BCA5-13765A63879F	TCGA-AA-3994	NO					22	6	0	DD7E778F-C979-4047-A97D-64AB067D0FD1	Scheduled Follow-up Submission	Complete Remission/Response	YES	No	YES	NO			NO	NO	24	NO		12	12			1		2		No	M0	N1	T3	3994		TUMOR FREE	YES	3.52	YES	Complete Remission/Response	NO
TCGA-D5-6929-01A	49	157.71.0	Nationwide Children's Hospital	TCGA-D5-6929-F29897	AE4CEDC0-70C2-4922-83B7-7E89FD9C9274	TCGA-D5-6929	NO			NO		22	30	0	550952A0-76FE-4FDF-A4D5-E1C0FDBD7CBF	Scheduled Follow-up Submission		NO	No	YES	NO			NO		12	YES		12	3	YES		1		1		No	M1	N1	T3	6929	YES	TUMOR FREE	YES	4.5	YES		NO
TCGA-CM-6674-01A	39	138.78.0	Nationwide Children's Hospital	TCGA-CM-6674-F15641	fbb8b7f0-a9ac-4747-b89a-15a5cc8bbf66	TCGA-CM-6674	NO			NO		22		0	A5497683-3F0E-4A19-A150-27A79A3261A6	Scheduled Follow-up Submission		NO	No	YES	NO			YES		43	NO		12	8	NO		1		0		No	M0	N0	T3	6674	NO	TUMOR FREE	NO	1.1	YES		NO
TCGA-A6-3810-01A	62	41.78.0	Nationwide Children's Hospital	TCGA-A6-3810-F4956	221709cd-63c8-4056-a34f-5439af646d1e	TCGA-A6-3810	NO			NO		22	19	0	ECE57F61-78F8-441F-A9F7-8771050FAD05			YES	No	YES	NO					30	NO		12	10	NO		0		0	0	No	M0	N0	T3	3810		TUMOR FREE	NO	1.7	YES		NO
TCGA-A6-3810-01B	62	41.78.0	Nationwide Children's Hospital	TCGA-A6-3810-F4956	221709cd-63c8-4056-a34f-5439af646d1e	TCGA-A6-3810	NO			NO		22	19	0	ECE57F61-78F8-441F-A9F7-8771050FAD05			YES	No	YES	NO					30	NO		12	10	NO		0		0	0	No	M0	N0	T3	3810		TUMOR FREE	NO	1.7	YES		NO
TCGA-A6-3810-11A	62	41.78.0	Nationwide Children's Hospital	TCGA-A6-3810-F4956	221709cd-63c8-4056-a34f-5439af646d1e	TCGA-A6-3810	NO			NO		22	19	0	ECE57F61-78F8-441F-A9F7-8771050FAD05			YES	No	YES	NO					30	NO		12	10	NO		0		0	0	No	M0	N0	T3	3810		TUMOR FREE	NO	1.7	YES		NO
TCGA-CK-5913-01A	58	89.77.0	Nationwide Children's Hospital	TCGA-CK-5913-F39698	DE4032FA-32BB-4738-A068-53A1EFB5A0FC	TCGA-CK-5913	YES	Normal	2	NO		22	30	0	13DFF8B6-8044-4EB8-AFFB-E914848BDC8D	Scheduled Follow-up Submission	Complete Remission/Response	NO	No	YES	NO			YES	NO		NO	YES	12	1	NO	9		10			No	MX	N0	T3	5913	NO	TUMOR FREE	NO	0.6		Complete Remission/Response	NO
TCGA-G4-6625-01A	77	123.74.0	Nationwide Children's Hospital	TCGA-G4-6625-F21901	055b44fa-ba11-4899-984d-01306fe1c57d	TCGA-G4-6625	NO			YES		22	2	0	543F0D7B-503B-423A-8BEA-4B6416E6D0FF	Scheduled Follow-up Submission		NO	No	YES	NO			NO		18	NO		12	2	NO		0		0		Yes	M0	N0	T3	6625	NO	TUMOR FREE	NO	5.5	YES		NO
TCGA-G4-6625-11A	77	123.74.0	Nationwide Children's Hospital	TCGA-G4-6625-F21901	055b44fa-ba11-4899-984d-01306fe1c57d	TCGA-G4-6625	NO			YES		22	2	0	543F0D7B-503B-423A-8BEA-4B6416E6D0FF	Scheduled Follow-up Submission		NO	No	YES	NO			NO		18	NO		12	2	NO		0		0		Yes	M0	N0	T3	6625	NO	TUMOR FREE	NO	5.5	YES		NO
TCGA-A6-2679-01A	73	76.78.0	Nationwide Children's Hospital	TCGA-A6-2679-F6153	fea92304-47d4-48da-825e-f392753ab136	TCGA-A6-2679	NO			NO		22	14	0	EFC95944-5AD8-4E7F-AC70-F2A68C165342			YES	No	YES	NO					16	NO		12	1	NO		0		0	0	No		N0	T3	2679		TUMOR FREE	NO	15.7	YES		NO
TCGA-A6-2679-11A	73	76.78.0	Nationwide Children's Hospital	TCGA-A6-2679-F6153	fea92304-47d4-48da-825e-f392753ab136	TCGA-A6-2679	NO			NO		22	14	0	EFC95944-5AD8-4E7F-AC70-F2A68C165342			YES	No	YES	NO					16	NO		12	1	NO		0		0	0	No		N0	T3	2679		TUMOR FREE	NO	15.7	YES		NO
TCGA-AA-A02E-01A	82	33.79.0	Nationwide Children's Hospital			TCGA-AA-A02E	NO					22		0	1B3EF1E9-5EA7-44B5-8416-62919988C5F4			NO	No	YES	NO			NO		16	YES		12				0		4		No	M1	N1	T3	A02E				441.9	YES
TCGA-F4-6461-01A	41	123.74.0	Nationwide Children's Hospital	TCGA-F4-6461-F29823	4B99A840-611B-4FF1-880C-E1E3FBA76407	TCGA-F4-6461	NO			NO		22	29	0	2DCD0C28-C849-43DF-8E71-5E72AE856B00	Scheduled Follow-up Submission		NO	No	YES	NO			NO		5	NO		12	3	NO				5	0	No	M0	N2	T4b	6461	NO	WITH TUMOR	NO		YES		NO
TCGA-AA-3662-01A	80	116.77.0	Nationwide Children's Hospital	TCGA-AA-3662-F37519	F088688F-498E-4403-8FCC-ADF69EF64C0C	TCGA-AA-3662	NO					22	3	0	489CDD49-A8D4-4649-BEB2-B22DE6457970	Scheduled Follow-up Submission	Partial Remission/Response	YES	No	YES	NO			NO	NO	15	NO		12	12			1		4		Yes	M1	N2	T4	3662		WITH TUMOR	YES	1286	YES	Partial Remission/Response	NO
TCGA-AA-3662-11A	80	116.77.0	Nationwide Children's Hospital	TCGA-AA-3662-F37519	F088688F-498E-4403-8FCC-ADF69EF64C0C	TCGA-AA-3662	NO					22	3	0	489CDD49-A8D4-4649-BEB2-B22DE6457970	Scheduled Follow-up Submission	Partial Remission/Response	YES	No	YES	NO			NO	NO	15	NO		12	12			1		4		Yes	M1	N2	T4	3662		WITH TUMOR	YES	1286	YES	Partial Remission/Response	NO
TCGA-AA-3973-01A	69	41.78.0	Nationwide Children's Hospital	TCGA-AA-3973-F37946	8B813650-4DEB-41F0-B373-EFA3FB00A0CC	TCGA-AA-3973	NO					22	6	0	30A56DB3-B03E-4437-B046-3E5952715439	Scheduled Follow-up Submission	Stable Disease	NO	No	YES	NO			NO	NO	21	YES		12	12			1		3		No	M1	N1	T4	3973		WITH TUMOR	YES	375.2	YES	Stable Disease	NO
TCGA-A6-6651-01A	55	138.78.0	Nationwide Children's Hospital	TCGA-A6-6651-F18649	a004938c-4f52-49d0-a40c-d8f5558d23d5	TCGA-A6-6651	NO			YES		22	21	0	6462DD79-6504-4451-8EF3-4E1BE9F76737			YES	No	YES	NO			NO		33	YES		12	11	NO		0		2		No	MX	N1b	T3	6651		TUMOR FREE	YES	0.4	YES		NO
TCGA-CA-6718-01A	46	138.78.0	Nationwide Children's Hospital	TCGA-CA-6718-F70854	18A956D9-89A5-4F2D-8F6D-E2C4A08BF25B	TCGA-CA-6718						22	10	0	05FDF782-1BF5-4A0A-B7B3-BBFAEAAF533F	Scheduled Follow-up Submission	Progressive Disease		No	YES					NO				12	3							No	M0	N0	T3	6718		WITH TUMOR	NO		NO	Complete Remission/Response	NO
TCGA-AA-A010-01A	46	33.79.0	Nationwide Children's Hospital	TCGA-AA-A010-F37310	322EA713-ED84-4859-8741-62719504B7C0	TCGA-AA-A010	NO					22	1	0	ACE5AEF6-2369-46C7-B78F-AFC877FA4D74	Scheduled Follow-up Submission	Complete Remission/Response	NO	No	YES	NO			NO	NO	45	NO		12	12			0		0		No	M0	N0	T4	A010		TUMOR FREE	YES	0.2	YES	Complete Remission/Response	NO
TCGA-AA-3821-01A	81	41.78.0	Nationwide Children's Hospital	TCGA-AA-3821-F38112	92E23E83-486C-42E4-B167-E3427F4420C7	TCGA-AA-3821	NO					22	10	0	B6B1465B-431A-4435-B80A-2C8F86D2CF93	Scheduled Follow-up Submission		YES	No	YES	NO			NO	NO	13			12	12			0		0		No	M0	N0	T2	3821		TUMOR FREE	NO	2.14	YES		NO
TCGA-QG-A5YV-01A	64	300.56.0	Nationwide Children's Hospital	TCGA-QG-A5YV-F58611	958B8030-CB7F-4A51-A42C-D8BBCCB79DDD	TCGA-QG-A5YV	NO		4	NO		22	16	0	8ED8D01F-6179-4E9E-B877-1D4F709041C1	Scheduled Follow-up Submission	Complete Remission/Response	NO	No	YES	NO			NO	NO	33	NO		12	4	NO		0		1		No	MX	N1a	T4b	A5YV	NO	TUMOR FREE	YES	15.04	YES	Complete Remission/Response	NO
TCGA-CM-6169-01A	67	89.77.0	Nationwide Children's Hospital	TCGA-CM-6169-F13992	88c2fd3f-5dbc-4466-a5b0-faed1422f484	TCGA-CM-6169	NO			NO		22	19	0	B1D95541-A157-46CA-825D-8B618DC15086	Scheduled Follow-up Submission		NO	No	YES	NO			NO		19	YES		12	7	NO		1		0		No	M0	N0	T3	6169	YES	TUMOR FREE	YES	4.6	YES		NO
TCGA-5M-AAT6-01A	40	422.38.0	Nationwide Children's Hospital	TCGA-5M-AAT6-F70107	783689E7-9A4D-45AD-81DF-3DE92AA8A28F	TCGA-5M-AAT6				YES		22	27	0	1FA41166-87D4-495E-B48F-2349D88A41FB	Scheduled Follow-up Submission	Progressive Disease	NO	No	YES	NO			NO	NO	11	YES		12	1	NO				10	0	No	M1a	N2b	T4a	AAT6	YES	WITH TUMOR	YES	2.61	YES	Progressive Disease	NO
TCGA-AA-A01G-01A	63	30.80.0	Nationwide Children's Hospital	TCGA-AA-A01G-F37301	3D7DE0AF-DAF1-4C5A-9C19-5E6F3B70F99E	TCGA-AA-A01G	NO					22	1	0	812BB56B-155D-423B-949A-07EBC2A77930	Scheduled Follow-up Submission	Complete Remission/Response	NO	No	YES	NO			NO	NO	22	NO		12	12			0		0		No	M0	N0	T3	A01G		TUMOR FREE	NO		YES	Complete Remission/Response	NO
TCGA-AY-4070-01A	50	45.80.0	Nationwide Children's Hospital	TCGA-AY-4070-F3531	f27453aa-abaa-4a40-8c16-d2ccf73dff51	TCGA-AY-4070	NO			NO		22	18	0	5898B8CA-8099-4465-A1FE-470884DD9AF3			NO	No	YES	YES		NO	NO		15	YES		12	11	NO		0		5	0	No	M0	N2	T3	4070	YES	WITH TUMOR	YES	67.5	YES		NO
TCGA-AA-3655-01A	68	116.77.0	Nationwide Children's Hospital	TCGA-AA-3655-F37517	D0D562BA-4412-4082-ACE4-97CCEC788DE3	TCGA-AA-3655	NO					22	3	0	7DDC0AE3-5423-4A34-99D5-2ADA47A40735	Scheduled Follow-up Submission	Complete Remission/Response	YES	No	YES	NO			NO	NO	22	NO		12	12			0		0		No	M0	N0	T3	3655		TUMOR FREE	NO	4	YES	Complete Remission/Response	NO
TCGA-AA-3655-11A	68	116.77.0	Nationwide Children's Hospital	TCGA-AA-3655-F37517	D0D562BA-4412-4082-ACE4-97CCEC788DE3	TCGA-AA-3655	NO					22	3	0	7DDC0AE3-5423-4A34-99D5-2ADA47A40735	Scheduled Follow-up Submission	Complete Remission/Response	YES	No	YES	NO			NO	NO	22	NO		12	12			0		0		No	M0	N0	T3	3655		TUMOR FREE	NO	4	YES	Complete Remission/Response	NO
TCGA-AA-A00Q-01A	66	30.80.0	Nationwide Children's Hospital	TCGA-AA-A00Q-F37316	CF962324-805E-4A84-AFE0-43118E001C25	TCGA-AA-A00Q	NO					22	1	0	DB3D0CE4-ACF8-47D4-A6AB-7CE0349C08EA	Scheduled Follow-up Submission	Complete Remission/Response	NO	No	YES	NO			NO	NO	31	YES		12	12			0		1		No	M0	N1	T4	A00Q		TUMOR FREE	YES	89.58	YES	Complete Remission/Response	NO
TCGA-DM-A28E-01A	72	154.69.0	Nationwide Children's Hospital	TCGA-DM-A28E-F19159	FB59BD36-E991-4383-95B9-B811AB68EC5B	TCGA-DM-A28E	YES	Normal		YES		22	5	0	41DA556D-D24C-4542-A04B-3941DEFFEC48	Scheduled Follow-up Submission		NO	No	YES	YES	12	YES			15	NO		12	12			0		0		No	M0	N0	T3	A28E					YES
TCGA-CM-6171-01A	77	89.77.0	Nationwide Children's Hospital	TCGA-CM-6171-F14000	62e3d059-76c6-47f4-a0b9-94d611aabf49	TCGA-CM-6171	NO			NO		22	19	0	F65D87E4-39AF-4621-B84E-5417ABD12F10	Scheduled Follow-up Submission		NO	No	YES	NO			NO		28	NO		12	7	NO		0		0		No	M0	N0	T2	6171	NO	TUMOR FREE	NO	2	YES		NO
TCGA-CM-6163-01A	74	89.77.0	Nationwide Children's Hospital	TCGA-CM-6163-F21455	171e5a53-3c04-4ea6-9c9a-10ee6867b0f8	TCGA-CM-6163	NO			YES		22	13	0	D7D070DC-733F-4F42-A355-7814B3C3856F	Scheduled Follow-up Submission		NO	No	YES	NO			NO		23	NO		12	2	NO		0		0		No	M0	N0	T1	6163	YES	TUMOR FREE	NO	8.8	YES		NO
TCGA-AZ-6598-01A	77	123.74.0	Nationwide Children's Hospital	TCGA-AZ-6598-F34145	F3C4F561-2E93-4C4A-9ED1-26FA330668D6	TCGA-AZ-6598						22	31	0	28158B57-A9F3-4E10-AC6A-C0DDBE71347F	Scheduled Follow-up Submission	Complete Remission/Response		No	YES					NO	24	NO		12	7					0		No	MX	N0	T3	6598	NO	TUMOR FREE	NO	7.5	YES	Complete Remission/Response	NO
TCGA-AZ-6598-11A	77	123.74.0	Nationwide Children's Hospital	TCGA-AZ-6598-F34145	F3C4F561-2E93-4C4A-9ED1-26FA330668D6	TCGA-AZ-6598						22	31	0	28158B57-A9F3-4E10-AC6A-C0DDBE71347F	Scheduled Follow-up Submission	Complete Remission/Response		No	YES					NO	24	NO		12	7					0		No	MX	N0	T3	6598	NO	TUMOR FREE	NO	7.5	YES	Complete Remission/Response	NO
TCGA-AA-A00W-01A	80	30.80.0	Nationwide Children's Hospital	TCGA-AA-A00W-F37313	6C202792-4958-4348-856D-ED281CC43A63	TCGA-AA-A00W	NO					22	1	0	F14DD154-DE04-4124-A4DF-DA8FB2B93AAB	Scheduled Follow-up Submission	Partial Remission/Response	YES	No	YES	NO			NO	NO	17	NO		12	12			1		0		No	M0	N0	T1	A00W		TUMOR FREE	NO	1.22	YES	Partial Remission/Response	NO
TCGA-DM-A0XF-01A	68	132.71.0	Nationwide Children's Hospital	TCGA-DM-A0XF-F17209	3D64F934-0A2F-4F67-8614-554332DF8ED6	TCGA-DM-A0XF	NO					22	25	0	BDFF2A33-3AF7-48F3-AB70-533E6289A219	Scheduled Follow-up Submission		NO	No	YES	YES	13	YES			22	NO	NO	12	10		0	0	6	4		No	M0	N2	T3	A0XF					YES
TCGA-DM-A28G-01A	75	154.69.0	Nationwide Children's Hospital	TCGA-DM-A28G-F19069	180A5BE8-4D27-4BD3-931D-FD1D3F63D3EB	TCGA-DM-A28G	YES	Normal		YES		22	2	0	746DD828-BCEE-4351-A7DB-6B2604DA4BFD	Scheduled Follow-up Submission		NO	No	YES	YES		NO			25	NO	NO	12	12		0	1	6	0		No	M0	N0	T3	A28G					YES
TCGA-AA-A01F-01A	72	30.80.0	Nationwide Children's Hospital	TCGA-AA-A01F-F37303	72C00353-3FBC-46E8-A778-98182FB4F3B0	TCGA-AA-A01F	NO					22	1	0	F40364C5-18E4-4327-8E8B-D6F96A388E4D	Scheduled Follow-up Submission		YES	No	YES	NO			NO	NO	30	YES		12	12			0		2		No	M0	N1	T3	A01F			YES		YES		NO
TCGA-AA-3681-01A	77	36.83.0	Nationwide Children's Hospital	TCGA-AA-3681-F38090	4422CB61-6976-46C1-A681-DBC2C2541401	TCGA-AA-3681	NO					22	10	0	52275E87-50A9-4AF8-986D-2B561713AD67	Scheduled Follow-up Submission	Complete Remission/Response	YES	No	YES	NO			NO	NO	16	NO		12	12			0		2		No	M0	N1	T3	3681		TUMOR FREE	NO	2.36	YES	Complete Remission/Response	NO
TCGA-AA-3489-01A	75	138.78.0	Nationwide Children's Hospital	TCGA-AA-3489-F37296	7AEABA35-8CEC-4929-B387-91118928317D	TCGA-AA-3489	NO					22	1	0	EEAAD985-95B1-479F-9241-35F376199B4D	Scheduled Follow-up Submission		NO	No	YES	NO			NO	NO	28			12	12			0		0		No	M0	N0	T3	3489			NO	1.7	YES		NO
TCGA-AA-3489-11A	75	138.78.0	Nationwide Children's Hospital	TCGA-AA-3489-F37296	7AEABA35-8CEC-4929-B387-91118928317D	TCGA-AA-3489	NO					22	1	0	EEAAD985-95B1-479F-9241-35F376199B4D	Scheduled Follow-up Submission		NO	No	YES	NO			NO	NO	28			12	12			0		0		No	M0	N0	T3	3489			NO	1.7	YES		NO
TCGA-AA-3841-01A	66	36.83.0	Nationwide Children's Hospital	TCGA-AA-3841-F38116	6F563EF6-A97C-4E05-851D-589DD30A013F	TCGA-AA-3841	NO					22	10	0	B6F89671-A0A6-4F07-83DE-DBD8ECF9D5E0	Scheduled Follow-up Submission	Complete Remission/Response	YES	No	YES	NO			NO	NO	24	YES		12	12			0		0		No	M0	N0	T3	3841		TUMOR FREE	YES		YES	Complete Remission/Response	NO
TCGA-AM-5820-01A	59	89.77.0	Nationwide Children's Hospital	TCGA-AM-5820-F68939	DBDE9F25-9F07-4909-9ABD-D9A05A0A7972	TCGA-AM-5820	NO			NO		22	24	0	D1343AA4-34D5-4DCB-B0B3-A8EC63E0D8B7	Scheduled Follow-up Submission		NO	No	YES	NO			NO	YES	4	YES	NO	12	8	NO		0		4		No	M1	N2	T4a	5820	NO			176.1	YES
TCGA-AZ-6608-01A	55	138.78.0	Nationwide Children's Hospital	TCGA-AZ-6608-F34186	5D17EE3B-FD93-4381-9AA0-A0254630B49C	TCGA-AZ-6608						22	1	0	5094A245-2589-45E1-80DB-F06CCE3B91F6	Scheduled Follow-up Submission	Progressive Disease		No	YES					NO	12	YES		12	8					2		Yes	M0	N1	T2	6608	NO		NO	3.7	YES	Progressive Disease	NO
TCGA-AZ-6608-11A	55	138.78.0	Nationwide Children's Hospital	TCGA-AZ-6608-F34186	5D17EE3B-FD93-4381-9AA0-A0254630B49C	TCGA-AZ-6608						22	1	0	5094A245-2589-45E1-80DB-F06CCE3B91F6	Scheduled Follow-up Submission	Progressive Disease		No	YES					NO	12	YES		12	8					2		Yes	M0	N1	T2	6608	NO		NO	3.7	YES	Progressive Disease	NO
TCGA-AA-3555-01A	81	28.86.0	Nationwide Children's Hospital	TCGA-AA-3555-F37511	ECE7F482-8211-4DFE-9245-B21423990D1D	TCGA-AA-3555	NO					22	3	0	1A98583A-AF72-407E-AC8E-6B8A5220E9C0	Scheduled Follow-up Submission	Complete Remission/Response	YES	No	YES	NO			NO	NO	26	NO		12	12			0		0		No	M0	N0	T3	3555		TUMOR FREE	NO		YES	Complete Remission/Response	NO
TCGA-DM-A0XD-01A	65	132.71.0	Nationwide Children's Hospital	TCGA-DM-A0XD-F17622	0C38327D-43E6-4718-A528-278EDEE9B6F7	TCGA-DM-A0XD	YES	Normal		YES		22	25	0	336DEC69-C97B-4290-B24C-421A8AD1F76D	Additional New Tumor Event		NO	No	YES	YES	13	YES			11	NO	NO	12	10		0	0	5	0		No	M0	N0	T3	A0XD					YES
TCGA-CA-5255-01A	45	138.78.0	Nationwide Children's Hospital	TCGA-CA-5255-F20294	fe0c2965-c0e3-4fff-ae77-bb2cb4cdf1f6	TCGA-CA-5255						22	9	0	D4BD4336-0FF3-421C-8DCF-5E29DC3C31D7				No	YES									12	1							No	M0	N0	T3	5255		TUMOR FREE	NO		NO		YES
TCGA-AA-3939-01A	83	41.78.0	Nationwide Children's Hospital	TCGA-AA-3939-F37984	F8DCB4DC-6DEA-4AAB-98C0-336DB5B0DD20	TCGA-AA-3939	NO					22	8	0	477CEDB4-F1A1-485A-B63E-E531288F1A18	Scheduled Follow-up Submission		YES	No	YES	NO			NO	NO	40	NO		12	12			0		0		Yes	M0	N0	T3	3939			NO		YES		NO
TCGA-AA-3814-01A	85	36.83.0	Nationwide Children's Hospital			TCGA-AA-3814	NO					22		0	1C6035D9-7325-482F-9CAB-2DED1CF4BCB8			NO	No	YES	NO			NO		23	YES		12				0		0		Yes	M0	N0	T3	3814				4.03	YES
TCGA-DM-A28M-01A	63	154.69.0	Nationwide Children's Hospital	TCGA-DM-A28M-F19071	B74CE1D8-BCCC-4AC6-B29C-A151BD6F07DE	TCGA-DM-A28M	YES	Normal				22	5	0	8C4222FC-CDED-41B9-BB7D-CF57962B3995	Scheduled Follow-up Submission		NO	No	YES	YES	12	YES			13	NO	NO	12	12		0	0	7	0		No	M0	N0	T3	A28M					YES
TCGA-D5-7000-01A	79	157.71.0	Nationwide Children's Hospital	TCGA-D5-7000-F29705	7497b543-0ff3-4c35-bd9a-d62033faad7a	TCGA-D5-7000	NO		30	NO		22	28	0	8F539266-F5BC-4739-8CC0-808410383C96	Scheduled Follow-up Submission		NO	No	YES	NO					14	NO	NO	12	3	NO		0		0		No	M0	N0	T2	7000	NO	TUMOR FREE	NO	2.4	YES		NO
TCGA-CM-4747-01A	47	76.78.0	Nationwide Children's Hospital	TCGA-CM-4747-F5355	e121c355-89bf-4272-9209-0956fc04b7cb	TCGA-CM-4747	NO			YES		22	23	0	A376D2F4-3963-484A-AF86-CD01FEAE73B2			YES	No	YES	NO			YES		29	YES		12	12	YES		0		2		No	M1a	N1b	T4a	4747	YES	TUMOR FREE	YES	2.6	YES		NO
TCGA-AA-3819-01A	41	36.83.0	Nationwide Children's Hospital	TCGA-AA-3819-F38111	CF3D0041-586F-4810-861E-51CE0B3324D3	TCGA-AA-3819	NO					22	10	0	4665E0FB-3BA5-4525-8A03-E743C34FDD6D	Scheduled Follow-up Submission	Complete Remission/Response	NO	No	YES	NO			NO	NO	14	YES		12	12			0		0		No	M0	N0	T3	3819		TUMOR FREE	NO	1.28	YES	Complete Remission/Response	NO
TCGA-AA-3514-01A	81	28.86.0	Nationwide Children's Hospital	TCGA-AA-3514-F37285	3CC56A86-697C-47BB-AD11-765EDCDB8456	TCGA-AA-3514	NO					22	1	0	C655A642-77CD-471F-B965-9BA9E0ED1688	Scheduled Follow-up Submission		YES	No	YES	NO			NO	NO	12	NO		12	12			0		0		No	M0	N0	T2	3514		TUMOR FREE	NO	2.3	YES		NO
TCGA-AA-3514-11A	81	28.86.0	Nationwide Children's Hospital	TCGA-AA-3514-F37285	3CC56A86-697C-47BB-AD11-765EDCDB8456	TCGA-AA-3514	NO					22	1	0	C655A642-77CD-471F-B965-9BA9E0ED1688	Scheduled Follow-up Submission		YES	No	YES	NO			NO	NO	12	NO		12	12			0		0		No	M0	N0	T2	3514		TUMOR FREE	NO	2.3	YES		NO
TCGA-4T-AA8H-01A	42	422.38.0	Nationwide Children's Hospital	TCGA-4T-AA8H-F67481	DF27B7FC-56DB-44B7-82B0-390D2C837EDE	TCGA-4T-AA8H	NO		20	NO		22	5	0	C6A066DD-3776-47D6-90F9-3FC786A7A657	Scheduled Follow-up Submission	Complete Remission/Response	NO	No	YES	NO			YES	NO	24	NO	NO	12	11	NO		0		0		No	MX	N0	T3	AA8H	NO	TUMOR FREE	NO		YES	Complete Remission/Response	NO
TCGA-AA-A02R-01A	84	33.79.0	Nationwide Children's Hospital			TCGA-AA-A02R	NO					22		0	2294FBD4-A7AF-410A-A352-3EC5B3BFE402			NO	No	YES	NO			NO		18	YES		12				0		0		No	M0	N0	T3	A02R				2.67	YES
TCGA-D5-5538-01A	60	89.77.0	Nationwide Children's Hospital	TCGA-D5-5538-F13827	b0e0994a-d81f-4ead-be64-788e2950a919	TCGA-D5-5538	NO		50	NO		22	20	0	DE93FF37-7BEF-4B16-9360-05A90EE8925A	Scheduled Follow-up Submission		NO	No	YES	NO			NO		6	NO		12	6	NO		0		3		No	M0	N1b	T3	5538	NO	TUMOR FREE	YES	4.11	YES		NO
TCGA-CM-5860-01A	44	89.77.0	Nationwide Children's Hospital	TCGA-CM-5860-F13743	be6ac22e-1f98-4e2f-a427-ceae1d08a80b	TCGA-CM-5860	NO			NO		22	11	0	DB4A70F7-DCA6-4C7F-B9B6-24121F5E427C	Scheduled Follow-up Submission		NO	No	YES	NO			NO		44	NO		12	7	NO		0		0		No	M0	N0	T3	5860	YES	TUMOR FREE	YES	3	YES		NO
TCGA-AA-3979-01A	84	41.78.0	Nationwide Children's Hospital	TCGA-AA-3979-F37940	626714A4-4E90-4BAD-8039-117AC1D46D3C	TCGA-AA-3979	NO					22	6	0	126013D5-6769-4ED5-96A3-45DD08EA9E26	Scheduled Follow-up Submission	Complete Remission/Response	NO	No	YES	NO			NO	NO	22	NO		12	12			0		0		Yes	M0	N0	T3	3979		TUMOR FREE	NO		YES	Complete Remission/Response	NO
TCGA-DM-A0X9-01A	71	132.71.0	Nationwide Children's Hospital	TCGA-DM-A0X9-F17075	B8FB36F5-52B5-4E84-96B4-07ADC17A8D51	TCGA-DM-A0X9	YES	Normal		YES		22	25	0	8FC076F9-90C8-4126-ADDB-C88B7FB07490	Scheduled Follow-up Submission		NO	No	YES	YES	12	YES			16	NO	NO	12	10		0	0	7	0		No	M0	N0	T3	A0X9					YES
TCGA-AA-3855-01A	72	41.78.0	Nationwide Children's Hospital	TCGA-AA-3855-F38000	2E5E8D2E-24B6-496F-A860-87A0CA7AD72E	TCGA-AA-3855	NO					22	8	0	0D998AB2-DFA4-41DE-93E7-784D1A85A053	Scheduled Follow-up Submission		YES	No	YES	NO			NO	NO	36	YES		12	12			0		0		No	M0	N0	T2	3855			NO		YES		NO
TCGA-F4-6805-01A	58	138.78.0	Nationwide Children's Hospital	TCGA-F4-6805-F35056	74EBEFE4-9028-4BA3-8CDC-30436A9A59CD	TCGA-F4-6805	NO			NO		22	14	0	1D22C0F1-C915-412D-81F5-2DA0E1D766AC	Scheduled Follow-up Submission	Complete Remission/Response	NO	No	YES	NO			NO	NO		NO		12	9	NO						No	M0	N0	T3	6805	NO	TUMOR FREE	YES		NO	Complete Remission/Response	NO
TCGA-NH-A6GA-01A	58	385.43.0	Nationwide Children's Hospital	TCGA-NH-A6GA-F64783	F615DBA7-6A47-49BC-80E0-456FC6B54725	TCGA-NH-A6GA	NO		50	NO		22	11	0	18074522-DA50-42CF-AF4E-1E4C0270DECB	Scheduled Follow-up Submission	Progressive Disease		No	YES	YES	12	YES		NO	33	YES	NO	12	9	YES		0		4		No	MX	N2a	T4a	A6GA	NO	WITH TUMOR	YES		YES	Progressive Disease	NO
TCGA-D5-6529-01A	69	123.74.0	Nationwide Children's Hospital	TCGA-D5-6529-F28928	e5a41cd8-0a19-47b5-821d-d6db0345375e	TCGA-D5-6529	NO		50	NO		22	2	0	46E1A416-EE5F-4B2A-BB6C-A2797E5478B4	Scheduled Follow-up Submission			No	YES	NO					19	NO		12	3	NO		0		0		No	M0	N0	T3	6529	YES	WITH TUMOR	NO	8.4	YES		NO
TCGA-D5-6922-01A	76	157.71.0	Nationwide Children's Hospital	TCGA-D5-6922-F29859	66bc8d5c-ee7d-4545-9bf9-06e36badd434	TCGA-D5-6922	NO			NO		22	30	0	7D5FCD3F-97D3-48EA-935F-6BD0D06D1D97	Scheduled Follow-up Submission		NO	No	YES	NO			NO		8	YES		12	3	NO		0		1		No	M0	N1	T3	6922	NO	TUMOR FREE	NO	4.3	YES		NO
TCGA-CA-5256-01A	54	76.78.0	Nationwide Children's Hospital	TCGA-CA-5256-F20284	72a4c2f9-52a8-49c8-835e-8357415506f3	TCGA-CA-5256	NO					22	9	0	EACB1933-11BE-482A-921E-411994A0088A			NO	No	YES	NO			NO					12	1	NO		0				No	M0	N0	T3	5256		TUMOR FREE	NO		NO		NO
TCGA-AA-3685-01A	69	36.83.0	Nationwide Children's Hospital	TCGA-AA-3685-F38092	556272C5-235F-451D-B5C3-DAEFE899DBF7	TCGA-AA-3685	NO					22	10	0	98566325-C3BB-4ED3-8B0D-815A8B35898B	Scheduled Follow-up Submission	Complete Remission/Response	YES	No	YES	NO			NO	NO	24	YES		12	12			0		0		No	M0	N0	T3	3685		TUMOR FREE	NO	8.76	YES	Complete Remission/Response	NO
TCGA-AA-3495-01A	79	76.78.0	Nationwide Children's Hospital	TCGA-AA-3495-F37274	3F0F1A83-DE10-469B-BEBE-E923D79110CE	TCGA-AA-3495	NO					22	1	0	6EE6466D-AFE6-457C-9A72-4EBC9CF75B5F	Scheduled Follow-up Submission	Complete Remission/Response	YES	No	YES	NO			NO	NO	18			12	12			0		0		No	M0	N0	T2	3495		TUMOR FREE	NO	1.9	YES	Complete Remission/Response	NO
TCGA-AA-3495-11A	79	76.78.0	Nationwide Children's Hospital	TCGA-AA-3495-F37274	3F0F1A83-DE10-469B-BEBE-E923D79110CE	TCGA-AA-3495	NO					22	1	0	6EE6466D-AFE6-457C-9A72-4EBC9CF75B5F	Scheduled Follow-up Submission	Complete Remission/Response	YES	No	YES	NO			NO	NO	18			12	12			0		0		No	M0	N0	T2	3495		TUMOR FREE	NO	1.9	YES	Complete Remission/Response	NO
TCGA-5M-AAT4-01A	74	422.38.0	Nationwide Children's Hospital	TCGA-5M-AAT4-F70103	5FB76E81-1057-4EA8-A938-3DD73EEBC1A9	TCGA-5M-AAT4	NO			YES		22	27	0	6E78DA6B-E0F4-4E36-BA82-9F1FAA42C54C		Progressive Disease	NO	No	YES	NO			NO	NO	3			12	1	NO		0		0	0	No	M1b	N0	T3	AAT4		WITH TUMOR	NO	550	YES	Progressive Disease	NO
TCGA-A6-5665-01A	84	89.77.0	Nationwide Children's Hospital	TCGA-A6-5665-F17987	3a84dc0c-15e9-4b82-a2b7-32fb24c0c855	TCGA-A6-5665	YES	Abnormal		YES		22	1	0	83168171-7625-41CA-AD3D-40ABFED2282D			NO	No	YES	NO			YES		25	YES	YES	12	11	NO	5	0	5	0		No	M0	N0	T3	5665		TUMOR FREE	NO	19	YES		NO
TCGA-A6-5665-01B	84	89.77.0	Nationwide Children's Hospital	TCGA-A6-5665-F17987	3a84dc0c-15e9-4b82-a2b7-32fb24c0c855	TCGA-A6-5665	YES	Abnormal		YES		22	1	0	83168171-7625-41CA-AD3D-40ABFED2282D			NO	No	YES	NO			YES		25	YES	YES	12	11	NO	5	0	5	0		No	M0	N0	T3	5665		TUMOR FREE	NO	19	YES		NO
TCGA-A6-5665-11A	84	89.77.0	Nationwide Children's Hospital	TCGA-A6-5665-F17987	3a84dc0c-15e9-4b82-a2b7-32fb24c0c855	TCGA-A6-5665	YES	Abnormal		YES		22	1	0	83168171-7625-41CA-AD3D-40ABFED2282D			NO	No	YES	NO			YES		25	YES	YES	12	11	NO	5	0	5	0		No	M0	N0	T3	5665		TUMOR FREE	NO	19	YES		NO
TCGA-CM-6675-01A	35	138.78.0	Nationwide Children's Hospital	TCGA-CM-6675-F15643	642025af-0945-40ef-a43d-443ce90faa16	TCGA-CM-6675	NO			NO		22		0	CDF8ECDC-B428-442E-8AD0-F4C0DCFFA6AA	Scheduled Follow-up Submission		NO	No	YES	NO			YES		72	NO		12	8	YES		0		12		No	M1b	N2b	T3	6675	YES	TUMOR FREE	YES	2	YES		NO
TCGA-AA-3510-01A	70	76.78.0	Nationwide Children's Hospital	TCGA-AA-3510-F37281	2CD258E2-1FA2-4226-8A41-8B85515B3DC7	TCGA-AA-3510	NO					22	1	0	C4E07884-3541-4754-945B-E14F06160613	Scheduled Follow-up Submission	Complete Remission/Response	YES	No	YES	NO			NO	NO	44	NO		12	12			0		0		No	M0	N0	T3	3510		TUMOR FREE	NO	3.59	YES	Complete Remission/Response	NO
TCGA-AA-3510-11A	70	76.78.0	Nationwide Children's Hospital	TCGA-AA-3510-F37281	2CD258E2-1FA2-4226-8A41-8B85515B3DC7	TCGA-AA-3510	NO					22	1	0	C4E07884-3541-4754-945B-E14F06160613	Scheduled Follow-up Submission	Complete Remission/Response	YES	No	YES	NO			NO	NO	44	NO		12	12			0		0		No	M0	N0	T3	3510		TUMOR FREE	NO	3.59	YES	Complete Remission/Response	NO
TCGA-AA-3554-01A	62	29.82.0	Nationwide Children's Hospital	TCGA-AA-3554-F37510	70EC0EFB-FA28-40CD-B9AD-8CAC20E2CF16	TCGA-AA-3554	NO					22	3	0	F11FE695-7134-405D-9D54-7368FCFBF9AF	Scheduled Follow-up Submission	Complete Remission/Response	YES	Yes	YES	NO			NO	NO	39	NO		12	12			3		0		Yes	M0	N0	T3	3554		TUMOR FREE	NO		YES	Complete Remission/Response	NO
TCGA-D5-6536-01A	73	116.77.0	Nationwide Children's Hospital	TCGA-D5-6536-F28925	041460eb-afaa-4b47-a417-48b06dddf2f9	TCGA-D5-6536	NO		11	NO		22	2	0	82C390E9-892B-4337-8A1D-21AD903A01C6	Scheduled Follow-up Submission			No	YES	NO					14	NO		12	3	NO				0		No	M0	N0	T3	6536	YES	WITH TUMOR	NO		YES		NO
TCGA-AA-3866-01A	78	41.78.0	Nationwide Children's Hospital	TCGA-AA-3866-F37991	F8289B38-8527-4BFE-B8DA-DFA5044814BE	TCGA-AA-3866	NO					22	8	0	788A4C1A-1133-4E55-9C07-E9DD3782C87D	Scheduled Follow-up Submission	Complete Remission/Response	NO	No	YES	NO			NO	NO	23	NO		12	12			0		0		No	M0	N0	T2	3866		TUMOR FREE	NO	11.36	YES	Complete Remission/Response	NO
TCGA-A6-6142-01A	56	123.74.0	Nationwide Children's Hospital	TCGA-A6-6142-F28725	03276653-4e71-4c56-8f41-e41b60422ae7	TCGA-A6-6142	NO			NO		22	28	0	3D50313A-AF32-4AFE-A5F8-A11D0792B7F0				No	YES	YES		NO	YES		37	YES	NO	12	2	NO	0	1	5	1		No	M1a	N1a	T3	6142		TUMOR FREE	YES	5.4	YES		NO
TCGA-AA-3952-01A	68	41.78.0	Nationwide Children's Hospital			TCGA-AA-3952	NO					22		0	DA0B2228-AF2A-4EC1-9520-7BEBCBD78C72			YES	No	YES	NO			NO		14	YES		12				0		6		Yes	M0	N2	T3	3952					YES
TCGA-AA-3875-01A	78	36.83.0	Nationwide Children's Hospital	TCGA-AA-3875-F37987	6838AD54-9C45-43AE-AF67-65EDBAAB6436	TCGA-AA-3875	NO					22	8	0	6E062E63-DF76-4A1D-9F2B-828FDAD8672D	Scheduled Follow-up Submission		NO	No	YES	NO			NO	NO	31	NO		12	12			0		0		No	M0	N0	T1	3875			NO	0.87	YES		NO
TCGA-CM-6680-01A	78	138.78.0	Nationwide Children's Hospital	TCGA-CM-6680-F15662	9856b08b-2641-4f63-be5b-59945123fb24	TCGA-CM-6680	NO			NO		22		0	D9E7C027-6CDD-438F-9392-72061992FFF2	Scheduled Follow-up Submission		NO	No	YES	NO			NO		17	NO		12	8	NO		0		4		No	M0	N2a	T3	6680	NO	TUMOR FREE	NO	1.4	YES		NO
TCGA-A6-4105-01A	79	123.74.0	Nationwide Children's Hospital	TCGA-A6-4105-F13353	955d7416-0751-4214-bf0e-66d3b0afd770	TCGA-A6-4105	NO			YES		22	24	0	2516E9FE-D51A-4DFA-872F-1E07DD43F075			NO	No	YES	NO			NO		19	NO	NO	12	6	NO	0	0	5	0		Yes	M0	N0	T3	4105		TUMOR FREE	NO		YES		NO
TCGA-AA-A01Z-01A	68	66.81.0	Nationwide Children's Hospital	TCGA-AA-A01Z-F37290	B46558D6-D06C-417E-AC84-0B7110CA1C36	TCGA-AA-A01Z	NO					22	1	0	104D4CFE-2914-4882-A3F1-C35D02C56713	Scheduled Follow-up Submission	Progressive Disease	YES	No	YES	NO			NO	NO	12	YES		12	12			0		0		No	M0	N0	T3	A01Z		WITH TUMOR	NO	18.87	YES	Progressive Disease	NO
TCGA-AA-A01Z-11A	68	66.81.0	Nationwide Children's Hospital	TCGA-AA-A01Z-F37290	B46558D6-D06C-417E-AC84-0B7110CA1C36	TCGA-AA-A01Z	NO					22	1	0	104D4CFE-2914-4882-A3F1-C35D02C56713	Scheduled Follow-up Submission	Progressive Disease	YES	No	YES	NO			NO	NO	12	YES		12	12			0		0		No	M0	N0	T3	A01Z		WITH TUMOR	NO	18.87	YES	Progressive Disease	NO
TCGA-AZ-6607-01A	69	138.78.0	Nationwide Children's Hospital	TCGA-AZ-6607-F34176	03947DF6-B8A3-4B22-8555-47DA919E0892	TCGA-AZ-6607						22	1	0	0BB75FF7-41E2-4072-91EA-1B5EBDF99F45	Scheduled Follow-up Submission	Progressive Disease		No	YES					NO	19	YES		12	8					5		No	M1	N2	T4	6607	YES	WITH TUMOR	NO	22.6	NO	Complete Remission/Response	NO
TCGA-AZ-6607-11A	69	138.78.0	Nationwide Children's Hospital	TCGA-AZ-6607-F34176	03947DF6-B8A3-4B22-8555-47DA919E0892	TCGA-AZ-6607						22	1	0	0BB75FF7-41E2-4072-91EA-1B5EBDF99F45	Scheduled Follow-up Submission	Progressive Disease		No	YES					NO	19	YES		12	8					5		No	M1	N2	T4	6607	YES	WITH TUMOR	NO	22.6	NO	Complete Remission/Response	NO
TCGA-AA-3675-01A	84	36.83.0	Nationwide Children's Hospital	TCGA-AA-3675-F37525	E7A3BDC3-0A78-4B76-BFB8-8D232FDA6861	TCGA-AA-3675	NO					22	3	0	3AC24858-BD7E-4F43-A2DD-638C75DB538F	Scheduled Follow-up Submission	Complete Remission/Response	YES	No	YES	NO			NO	NO	24	NO		12	12			0		0		No	M0	N0	T3	3675		TUMOR FREE	NO	5.06	YES	Complete Remission/Response	NO
TCGA-AA-A02J-01A	70	33.79.0	Nationwide Children's Hospital			TCGA-AA-A02J	NO					22		0	9AD340D5-51B7-420C-94B0-E2326C069879			NO	No	YES	NO			NO		13	YES		12				1		0		No	M1	N0	T3	A02J				96.57	YES
TCGA-G4-6298-01A	90	116.77.0	Nationwide Children's Hospital	TCGA-G4-6298-F21899	f60f0d08-60bd-4515-aa39-c364b1163c69	TCGA-G4-6298	NO			NO		22	20	0	BD84EEFC-4534-4F85-B33F-2508930C36CC	Scheduled Follow-up Submission		NO	No	YES	NO			NO		37	NO		12	1	NO		0		1		Yes	MX	N1	T4a	6298	YES	WITH TUMOR	NO		YES		NO
TCGA-G4-6298-11A	90	116.77.0	Nationwide Children's Hospital	TCGA-G4-6298-F21899	f60f0d08-60bd-4515-aa39-c364b1163c69	TCGA-G4-6298	NO			NO		22	20	0	BD84EEFC-4534-4F85-B33F-2508930C36CC	Scheduled Follow-up Submission		NO	No	YES	NO			NO		37	NO		12	1	NO		0		1		Yes	MX	N1	T4a	6298	YES	WITH TUMOR	NO		YES		NO
TCGA-AA-A01T-01A	63	66.81.0	Nationwide Children's Hospital	TCGA-AA-A01T-F37292	789DD55E-9B97-45A5-A8B1-0A62864EA7A5	TCGA-AA-A01T	NO					22	1	0	6A1F1F6A-A952-4360-A960-AA9D74182934	Scheduled Follow-up Submission	Complete Remission/Response	NO	No	YES	NO			NO	NO	15	YES		12	12			0		1		No	M0	N1	T3	A01T		TUMOR FREE	YES	0.7	YES	Complete Remission/Response	NO
TCGA-AA-A01T-11A	63	66.81.0	Nationwide Children's Hospital	TCGA-AA-A01T-F37292	789DD55E-9B97-45A5-A8B1-0A62864EA7A5	TCGA-AA-A01T	NO					22	1	0	6A1F1F6A-A952-4360-A960-AA9D74182934	Scheduled Follow-up Submission	Complete Remission/Response	NO	No	YES	NO			NO	NO	15	YES		12	12			0		1		No	M0	N1	T3	A01T		TUMOR FREE	YES	0.7	YES	Complete Remission/Response	NO
TCGA-G4-6309-01A	40	138.78.0	Nationwide Children's Hospital	TCGA-G4-6309-F21946	f271a489-f64b-4e61-8b65-af850ac0e6d4	TCGA-G4-6309	NO			YES		22	7	0	A98346E2-2DB9-4812-BB18-8E321BF5E137	Scheduled Follow-up Submission		NO	No	YES	NO			YES		24	NO	YES	12	1	NO		0		2		No	M0	N1	T3	6309	NO	TUMOR FREE	YES		YES		NO
TCGA-CM-6679-01A	58	138.78.0	Nationwide Children's Hospital	TCGA-CM-6679-F15660	2eb0032a-48ae-4ccc-8f4c-88beaec88e8e	TCGA-CM-6679	NO		40	NO		22		0	DA87AD06-28FA-42B1-92EA-FAEF8F6F5E9B	Scheduled Follow-up Submission		NO	No	YES	NO			YES		21	NO		12	8	NO		0		0		No	M0	N0	T3	6679	NO	TUMOR FREE	NO	2.3	YES		NO
TCGA-AA-A03J-01A	65	66.81.0	Nationwide Children's Hospital	TCGA-AA-A03J-F37276	F597B718-AC8A-4AA1-86B3-94AEF446F5E6	TCGA-AA-A03J	NO					22	1	0	CC972687-DE87-4D55-B85C-7C3B8D9F50D2	Scheduled Follow-up Submission	Complete Remission/Response	YES	No	YES	NO			NO	NO	34			12	12			1		0		No	M0	N0	T2	A03J		TUMOR FREE	NO	2.09	YES	Complete Remission/Response	NO
TCGA-AA-A03J-11A	65	66.81.0	Nationwide Children's Hospital	TCGA-AA-A03J-F37276	F597B718-AC8A-4AA1-86B3-94AEF446F5E6	TCGA-AA-A03J	NO					22	1	0	CC972687-DE87-4D55-B85C-7C3B8D9F50D2	Scheduled Follow-up Submission	Complete Remission/Response	YES	No	YES	NO			NO	NO	34			12	12			1		0		No	M0	N0	T2	A03J		TUMOR FREE	NO	2.09	YES	Complete Remission/Response	NO
TCGA-CA-6717-01A	57	138.78.0	Nationwide Children's Hospital	TCGA-CA-6717-F70858	4BDF04E5-1D50-46E2-AFD6-5D1CC319CA79	TCGA-CA-6717						22	10	0	277555DA-461D-4C8E-BE73-475382FD0EAF	Scheduled Follow-up Submission	Complete Remission/Response		No	YES					NO				12	3							No	M0	N0	T3	6717		TUMOR FREE	YES		NO	Complete Remission/Response	NO
TCGA-CK-6751-01A	88	138.78.0	Nationwide Children's Hospital	TCGA-CK-6751-F14758	bd6e9673-e145-4c90-9fd5-3c2a1d9854c4	TCGA-CK-6751	NO			NO		22		0	2986C44E-1CF1-48FD-8734-B3A197178B6C			NO	No	YES	NO						NO		12	8	NO						No	MX	N0	T2	6751	NO	TUMOR FREE	NO	1.3			NO
TCGA-QL-A97D-01A	84	422.38.0	Nationwide Children's Hospital	TCGA-QL-A97D-F66328	571D720E-E5C4-4E8F-BA2D-4E9120DE296F	TCGA-QL-A97D						22	29	0	A8E83A33-526D-4D42-BF04-15E67B7B59A0		Complete Remission/Response		No	YES					NO	13			12	10					0		No	MX	N0	T2	A97D		TUMOR FREE	NO		YES	Complete Remission/Response	NO
TCGA-CM-6161-01A	36	89.77.0	Nationwide Children's Hospital	TCGA-CM-6161-F13924	1eb08eb8-f4a0-40d8-94e8-a98dea862c25	TCGA-CM-6161	NO			YES		22	19	0	C182B499-A7E3-4447-9639-A65EC2CBBA99	Scheduled Follow-up Submission		NO	No	YES	NO			YES		31	NO	NO	12	7	NO	0	0	5	0		No	M0	N0	T2	6161	NO	TUMOR FREE	NO	0.4	YES		NO
TCGA-AA-3850-01A	74	41.78.0	Nationwide Children's Hospital			TCGA-AA-3850	NO					22		0	F8911E1C-D70D-403B-97DA-08686C5E58CD			YES	No	YES	NO			NO		15	YES		12				0		0		No	M0	N0	T2	3850					YES
TCGA-AA-3666-01A	68	36.83.0	Nationwide Children's Hospital			TCGA-AA-3666	NO					22		0	E3C4A6B9-EC4B-4E86-89CD-EDA46673C57A			NO	No	YES	NO			NO		41	NO		12				0		2		No	M0	N1	T3	3666				41.6	YES
TCGA-AA-3488-01A	58	76.78.0	Nationwide Children's Hospital			TCGA-AA-3488	NO					22		0	883E6C01-9DDF-4271-B644-4212B3EFD08E			NO	No	YES	NO			NO		26			12				0		15		No	M1	N2	T3	3488					YES
TCGA-AA-3488-11A	58	76.78.0	Nationwide Children's Hospital			TCGA-AA-3488	NO					22		0	883E6C01-9DDF-4271-B644-4212B3EFD08E			NO	No	YES	NO			NO		26			12				0		15		No	M1	N2	T3	3488					YES
TCGA-A6-5666-01A	78	89.77.0	Nationwide Children's Hospital	TCGA-A6-5666-F12341	16213052-c10a-4309-be05-0e4f3238b6d9	TCGA-A6-5666	NO			NO		22	27	0	39DDE795-BCE5-4684-8774-FC4EFC7C210A			NO	No	YES	NO			NO		30	NO		12	5	YES		0		0		No	M0	N0	T4b	5666		TUMOR FREE	NO	3.5	YES		NO
TCGA-A6-5666-11A	78	89.77.0	Nationwide Children's Hospital	TCGA-A6-5666-F12341	16213052-c10a-4309-be05-0e4f3238b6d9	TCGA-A6-5666	NO			NO		22	27	0	39DDE795-BCE5-4684-8774-FC4EFC7C210A			NO	No	YES	NO			NO		30	NO		12	5	YES		0		0		No	M0	N0	T4b	5666		TUMOR FREE	NO	3.5	YES		NO
TCGA-AA-A02K-01A	50	66.81.0	Nationwide Children's Hospital	TCGA-AA-A02K-F37283	0705ED4D-DC6A-4AAD-9525-E2EEA03A47D7	TCGA-AA-A02K	NO					22	1	0	98AB0334-BA81-42E6-83E6-056316A2B08A	Scheduled Follow-up Submission	Progressive Disease	NO	No	YES	NO			NO	NO	20	YES		12	12			1		7		No	M1	N2	T4	A02K		WITH TUMOR	YES		YES	Progressive Disease	NO
TCGA-5M-AATE-01A	76	422.38.0	Nationwide Children's Hospital	TCGA-5M-AATE-F70110	AB186DC8-D4BE-474C-9EEC-3C380DF9C952	TCGA-5M-AATE	NO			NO		22	27	0	5F49CFDF-3B6D-4D3C-B54B-27EC625F13FE	Scheduled Follow-up Submission	Partial Remission/Response	NO	No	YES	YES		YES	NO	NO	15	NO		12	1	NO		0		0	0	No	M0	N0	T3	AATE	NO	WITH TUMOR	NO	2.91	YES	Progressive Disease	NO
TCGA-CM-6168-01A	84	89.77.0	Nationwide Children's Hospital	TCGA-CM-6168-F13990	e9f47721-0016-4d88-885a-0b1c9ef49014	TCGA-CM-6168	NO			NO		22	19	0	37D76764-AAE7-4E97-844A-E15EBE344CDD	Scheduled Follow-up Submission		NO	No	YES	NO			NO		31	NO		12	7	NO		0		0		No	M0	N0	T3	6168	NO	TUMOR FREE	NO	7.8	YES		NO
TCGA-A6-2686-01A	81	76.78.0	Nationwide Children's Hospital	TCGA-A6-2686-F5721	2018bb65-adee-4393-b81b-62fab11c2bcb	TCGA-A6-2686	NO			NO		22	19	0	44D20932-DBC1-472B-B762-1A67A191AAE4			NO	No	YES	NO					33	NO		12	1	NO		0		0		No	M0	N0	T3	2686		TUMOR FREE	NO	2.2	YES		NO
TCGA-A6-2686-11A	81	76.78.0	Nationwide Children's Hospital	TCGA-A6-2686-F5721	2018bb65-adee-4393-b81b-62fab11c2bcb	TCGA-A6-2686	NO			NO		22	19	0	44D20932-DBC1-472B-B762-1A67A191AAE4			NO	No	YES	NO					33	NO		12	1	NO		0		0		No	M0	N0	T3	2686		TUMOR FREE	NO	2.2	YES		NO
TCGA-AA-3861-01A	72	41.78.0	Nationwide Children's Hospital	TCGA-AA-3861-F37996	72BF7711-DBDA-4FF2-9FE2-43BB072B5E0F	TCGA-AA-3861	NO					22	8	0	438BAE56-D341-421E-BDD1-49F5BE25068B	Scheduled Follow-up Submission	Complete Remission/Response	NO	No	YES	NO			NO	NO	17	YES		12	12			0		0		No	M0	N0	T3	3861		TUMOR FREE	NO		YES	Complete Remission/Response	NO
TCGA-CK-6747-01A	87	138.78.0	Nationwide Children's Hospital	TCGA-CK-6747-F14825	e2810946-304a-4ae0-b2f6-d635d2a87d08	TCGA-CK-6747	NO			NO		22		0	91FF0332-F3F5-4BC8-871C-43BA2F0DC284			NO	No	YES	NO						NO		12	8	NO						No	MX	N0	T3	6747	NO	TUMOR FREE	NO	0.9			NO
TCGA-G4-6626-01A	90	123.74.0	Nationwide Children's Hospital	TCGA-G4-6626-F21885	4a594724-3caa-46df-8191-ee10cf41514c	TCGA-G4-6626				NO		22	2	0	49CD2172-6E6C-4F94-866C-487AD47C9F49	Scheduled Follow-up Submission		NO	No	YES	NO			NO		16	NO		12	2	NO		0		0		No	M0	N0	T3	6626	NO	TUMOR FREE	NO		YES		NO
TCGA-QG-A5YX-01A	61	300.56.0	Nationwide Children's Hospital	TCGA-QG-A5YX-F58610	F05B2671-9D64-40B1-B6AF-3F965F5F795B	TCGA-QG-A5YX	NO		25	YES		22	16	0	E7B3EC0C-8D28-4460-9D94-67B2A5A40E46	Scheduled Follow-up Submission	Complete Remission/Response	NO	No	YES	NO			YES	NO	13	NO		12	4	NO		1		0		No	MX	N0	T3	A5YX	NO	TUMOR FREE	YES	2.04	YES	Complete Remission/Response	NO
TCGA-AA-3977-01A	65	41.78.0	Nationwide Children's Hospital	TCGA-AA-3977-F37942	7E76868D-8DD7-462C-95F2-664196FD580D	TCGA-AA-3977	NO					22	6	0	62A7A564-FF48-4C20-AFAF-9CD72B8236EB	Scheduled Follow-up Submission	Complete Remission/Response	YES	No	YES	NO			NO	NO	15	NO		12	12			0		0		No		N0	T2	3977		TUMOR FREE	NO		YES	Complete Remission/Response	NO
TCGA-AA-3560-01A	72	28.86.0	Nationwide Children's Hospital	TCGA-AA-3560-F37514	4ED04A14-4E95-45D1-98E7-D07792B41B14	TCGA-AA-3560	NO					22	3	0	153DADCF-0C21-44B8-BC4D-9DADEB047498	Scheduled Follow-up Submission	Complete Remission/Response	YES	No	YES	NO			NO	NO	25	YES		12	12			0		5		Yes	M0	N2	T3	3560		TUMOR FREE	YES		YES	Complete Remission/Response	NO
TCGA-AA-3972-01A	72	41.78.0	Nationwide Children's Hospital	TCGA-AA-3972-F37947	1461B87D-2A34-4F25-8075-53CF6A9B9262	TCGA-AA-3972	NO					22	6	0	52E54F80-AEBF-468A-A784-6FABCF251D39	Scheduled Follow-up Submission	Progressive Disease	NO	No	YES	NO			NO	NO	12	NO		12	12			0		3		Yes	M1	N1	T3	3972		WITH TUMOR	YES	5.15	YES	Progressive Disease	NO
TCGA-CK-4950-01A	68	116.77.0	Nationwide Children's Hospital	TCGA-CK-4950-F9824	033e4e32-4fc0-4574-af89-feaf7df285a9	TCGA-CK-4950	NO		25	NO		22	1	0	D435AEA6-C69C-439C-92DD-BD142307F482			NO	No	YES	NO					18	NO		12	4	NO				1	0	No	M0	N1	T3	4950	NO	TUMOR FREE	YES		YES		NO
TCGA-AA-3877-01A	83	41.78.0	Nationwide Children's Hospital	TCGA-AA-3877-F37986	943CAA49-964B-4317-8CD8-C791D92B9488	TCGA-AA-3877	NO					22	8	0	AD9C8500-6F79-4150-ADEB-5D56584132E2	Scheduled Follow-up Submission	Complete Remission/Response	YES	No	YES	NO			NO	NO	18	NO		12	12			0		0		No	M0	N0	T1	3877		TUMOR FREE	NO	5.6	YES	Complete Remission/Response	NO
TCGA-4N-A93T-01A	67	385.43.0	Nationwide Children's Hospital	TCGA-4N-A93T-F67783	B614BDCE-3651-4441-BA59-DDDD53D595FF	TCGA-4N-A93T	NO		30	YES		22	11	0	2C27A502-16F5-4EDD-BD90-07A25B2B8A48	Scheduled Follow-up Submission	Stable Disease	NO	No	YES	NO			YES	NO	25	NO		12	11	YES		0			2	No	M0	N1b	T4a	A93T	NO	WITH TUMOR	YES	2	YES	Stable Disease	NO
TCGA-AA-A00K-01A	79	30.80.0	Nationwide Children's Hospital	TCGA-AA-A00K-F72574	276C9D30-A166-4AEB-A63D-A499C579271A	TCGA-AA-A00K	NO					22	24	0	A9F34C04-CF32-4FB5-8053-E0EA3664F6D7	Scheduled Follow-up Submission		NO	No	YES	NO			NO	NO	55	NO		12	7			0		0		No	M0	N0	T3	A00K					YES
TCGA-AA-3947-01A	60	41.78.0	Nationwide Children's Hospital	TCGA-AA-3947-F37982	2F441C1E-987A-495C-8488-DF77BBA7D3BA	TCGA-AA-3947	NO					22	8	0	8BB1F3EF-BE85-478F-B5BF-DC3714340F8C	Scheduled Follow-up Submission	Complete Remission/Response	YES	No	YES	NO			NO	NO	22	NO		12	12			0		0		No	M0	N0	T4	3947		TUMOR FREE	NO		YES	Complete Remission/Response	NO
TCGA-CM-5864-01A	60	89.77.0	Nationwide Children's Hospital	TCGA-CM-5864-F13896	4f89053d-6874-4b69-9946-b65349b67b97	TCGA-CM-5864	NO			NO		22	18	0	E7E3A524-A87F-4DBF-A2AE-B6AB8D71D1FD	Scheduled Follow-up Submission		NO	No	YES	NO			YES		33	NO		12	7	NO		1		0		No	M0	N0	T2	5864	NO	TUMOR FREE	NO	2.8	YES		NO
TCGA-DM-A1HA-01A	82	132.71.0	Nationwide Children's Hospital	TCGA-DM-A1HA-F19072	D0C8AE24-AF2B-4916-BF49-5383AC7B66FD	TCGA-DM-A1HA	YES	Normal		YES		22	5	0	238B9BB0-D619-48FE-8BFF-5B435A5D9EEF	Scheduled Follow-up Submission		YES	No	YES	YES	12	YES			17		NO	12	12		0	0	5	4		No	M0	N2	T3	A1HA					YES
TCGA-G4-6304-01A	66	157.71.0	Nationwide Children's Hospital	TCGA-G4-6304-F21875	bd0b5c0b-747f-4aa4-936d-8b4165073514	TCGA-G4-6304	NO			NO		22	6	0	F1EC1ED0-2519-4719-82B3-1957AEEE6EBF	Scheduled Follow-up Submission		NO	No	YES	NO			NO		25	NO		12	2	NO		0		0		No	M0	N0	T4	6304	NO	TUMOR FREE	YES	4.4	NO		NO
TCGA-DM-A28A-01A	78	154.69.0	Nationwide Children's Hospital	TCGA-DM-A28A-F19065	860F60C3-2E50-4686-B22F-02038CF2602E	TCGA-DM-A28A	YES	Normal				22	2	0	8FB39462-B0B3-4B25-857D-7DDA12642E75	Scheduled Follow-up Submission		NO	No	YES	YES	12	YES			15	NO	NO	12	12		1	0	6	6		No	M0	N2	T3	A28A					YES
TCGA-AA-A01K-01A	74	33.79.0	Nationwide Children's Hospital	TCGA-AA-A01K-F37298	E5AA78A4-0BE9-43F2-93DD-3C7CE6B26EA0	TCGA-AA-A01K	NO					22	1	0	4E9F13F2-4CE8-4911-B604-A01DB2D52FD7	Scheduled Follow-up Submission	Complete Remission/Response	NO	No	YES	NO			NO	NO	35	YES		12	12			0		4		No	M0	N2	T3	A01K		TUMOR FREE	YES		YES	Complete Remission/Response	NO
TCGA-D5-6533-01A	68	116.77.0	Nationwide Children's Hospital	TCGA-D5-6533-F34448	F1D508A2-A881-423E-B96C-A2EF901D96FE	TCGA-D5-6533	NO		0	NO		22	15	0	ACD4F6C7-3B3E-4197-A3F0-4377C6B91481	Scheduled Follow-up Submission	Complete Remission/Response	NO	No	YES	NO			NO	NO	8	NO		12	8	NO		0		0		No	M0	N0	T4b	6533	YES		YES	228.8	YES	Complete Remission/Response	NO
TCGA-A6-2683-01A	57	28.86.0	Nationwide Children's Hospital	TCGA-A6-2683-F4958	deadb59f-d6f0-40db-a0dd-028d65d5bee4	TCGA-A6-2683	NO			NO		22	18	0	86717174-ABF8-4871-876B-03858552BF1D			YES	No	YES	YES	12	YES	YES		25	NO	NO	12	10	NO	0	0	4	0	0	No	M1	N0	T4	2683		WITH TUMOR	YES	2614	YES		NO
TCGA-A6-2683-11A	57	28.86.0	Nationwide Children's Hospital	TCGA-A6-2683-F4958	deadb59f-d6f0-40db-a0dd-028d65d5bee4	TCGA-A6-2683	NO			NO		22	18	0	86717174-ABF8-4871-876B-03858552BF1D			YES	No	YES	YES	12	YES	YES		25	NO	NO	12	10	NO	0	0	4	0	0	No	M1	N0	T4	2683		WITH TUMOR	YES	2614	YES		NO
TCGA-G4-6588-01A	58	123.74.0	Nationwide Children's Hospital	TCGA-G4-6588-F21886	5790aa3d-cbd3-4c7f-96db-e2f4dc41252e	TCGA-G4-6588	NO			NO		22	31	0	EBA5BCC0-B822-485C-BC85-D56D30E8319E	Scheduled Follow-up Submission		YES	No	YES	NO			YES		15	NO	YES	12	1	NO		0		0		Yes	M0	N0	T3	6588	NO	TUMOR FREE	NO	2.8	NO		NO
TCGA-AA-3846-01A	74	41.78.0	Nationwide Children's Hospital	TCGA-AA-3846-F38006	8328B6CE-A20C-4933-94C9-70F97D45B279	TCGA-AA-3846	NO					22	8	0	0B31858F-EB80-4459-AA78-F37F5BBC38BA	Scheduled Follow-up Submission		YES	No	YES	NO			NO	NO	16	YES		12	12			0		0		No	M0	N0	T3	3846			NO		YES		NO
TCGA-AM-5821-01A	68	89.77.0	Nationwide Children's Hospital	TCGA-AM-5821-F68940	E2F32BB9-25C6-4409-9ABB-84EE6AD29138	TCGA-AM-5821	NO					22	24	0	1C39861D-36AE-4BA6-9EDE-E257860D1850	Scheduled Follow-up Submission		YES	No	YES	NO			NO	YES		NO		12	8	NO		0				No	M0	N0	T3	5821	NO				NO
TCGA-AA-3684-01A	65	36.83.0	Nationwide Children's Hospital			TCGA-AA-3684	NO					22		0	D31732BC-075B-455B-A4AB-1F517270D528			YES	No	YES	NO			NO		10	YES		12				0		9		No	M1	N2	T4	3684				2.28	YES
TCGA-A6-5656-01A	74	138.78.0	Nationwide Children's Hospital	TCGA-A6-5656-F15816	c53511a6-e362-4ebe-9f2a-229ba56761af	TCGA-A6-5656	NO			NO		22	1	0	D66A4BC5-FB4F-4789-9BDE-B5CB06921371			YES	No	YES	NO			NO		16	NO		12	9	NO		0		0		No	M0	N0	T2	5656		TUMOR FREE	NO	5.1	YES		NO
TCGA-A6-5656-01B	74	138.78.0	Nationwide Children's Hospital	TCGA-A6-5656-F15816	c53511a6-e362-4ebe-9f2a-229ba56761af	TCGA-A6-5656	NO			NO		22	1	0	D66A4BC5-FB4F-4789-9BDE-B5CB06921371			YES	No	YES	NO			NO		16	NO		12	9	NO		0		0		No	M0	N0	T2	5656		TUMOR FREE	NO	5.1	YES		NO
TCGA-AA-A01S-01A	47	66.81.0	Nationwide Children's Hospital			TCGA-AA-A01S	NO					22		0	66BB3826-555C-40B4-86F2-AFA8562BDDE4			NO	No	YES	NO			NO		19			12				0		1		No	M0	N1	T3	A01S				0.82	YES
TCGA-AA-A01S-11A	47	66.81.0	Nationwide Children's Hospital			TCGA-AA-A01S	NO					22		0	66BB3826-555C-40B4-86F2-AFA8562BDDE4			NO	No	YES	NO			NO		19			12				0		1		No	M0	N1	T3	A01S				0.82	YES
TCGA-AA-3851-01A	74	41.78.0	Nationwide Children's Hospital	TCGA-AA-3851-F38003	DFC12F42-56A9-44A7-9390-F15DB394871C	TCGA-AA-3851	NO					22	8	0	388C7DC4-62B7-416E-ACA9-AA10A5FC446C	Scheduled Follow-up Submission		YES	No	YES	NO			NO	NO	14	YES		12	12			1		0		No	M0	N0	T3	3851			NO	7.55	YES		NO
TCGA-AA-3971-01A	58	41.78.0	Nationwide Children's Hospital	TCGA-AA-3971-F37948	2E430C9C-D4FA-4B21-B122-BFE742F043D0	TCGA-AA-3971	NO					22	6	0	A3A3756A-8A6E-4B0D-9A06-FD8199F0A094	Scheduled Follow-up Submission	Complete Remission/Response	NO	No	YES	NO			NO	NO	19	NO		12	12			0		2		No	M0	N1	T3	3971		TUMOR FREE	YES	1.48	YES	Complete Remission/Response	NO
TCGA-AA-3844-01A	78	41.78.0	Nationwide Children's Hospital	TCGA-AA-3844-F38230	C3740971-CEB9-4D61-BA5F-16B5EE9D2DAE	TCGA-AA-3844	NO					22	11	0	BB8AF61E-D511-4AAC-805D-4497D51E449B	Scheduled Follow-up Submission	Progressive Disease	NO	No	YES	NO			NO	NO	18	YES		12	12			0		7		Yes	M0	N2	T3	3844		WITH TUMOR	YES		YES	Progressive Disease	YES
TCGA-AA-3982-01A	75	41.78.0	Nationwide Children's Hospital	TCGA-AA-3982-F37939	6774694D-864E-4280-B673-729BDDA233E6	TCGA-AA-3982	NO					22	6	0	FD08682E-9DFA-4F87-9648-2426C86816EB	Scheduled Follow-up Submission		YES	No	YES	NO			NO	NO	13	YES		12	12			0		3		No	M0	N1	T3	3982			NO		YES		NO
TCGA-AA-3693-01A	77	36.83.0	Nationwide Children's Hospital			TCGA-AA-3693	NO					22		0	C1E341F0-448A-4CD6-91C5-C222B579319A			NO	No	YES	NO			NO		17	YES		12				0		2		No	M1	N1	T4	3693				2.42	YES
TCGA-D5-6930-01A	67	157.71.0	Nationwide Children's Hospital	TCGA-D5-6930-F34404	A70E2535-70FD-4B2F-AE14-26F324CFFF29	TCGA-D5-6930	NO		40	YES		22	14	0	721FC1EB-5C97-4D8F-A642-6F1A19B6D411	Scheduled Follow-up Submission	Complete Remission/Response	NO	No	YES	NO			NO	NO	20	NO		12	8	NO		0		0	0	No	M0	N0	T3	6930	YES		NO	3	YES		NO
TCGA-DM-A280-01A	70	154.69.0	Nationwide Children's Hospital	TCGA-DM-A280-F19061	18538D25-0C10-4219-9020-1F4B3F9E6789	TCGA-DM-A280	YES	Normal		NO		22	2	0	D4C64415-5D13-4AFA-9029-060033681ACF	Scheduled Follow-up Submission		NO	No	YES	YES	12	YES			10	NO	NO	12	12		0	0	5	0		No	M0	N0	T3	A280					YES
TCGA-A6-4107-01A	57	76.78.0	Nationwide Children's Hospital	TCGA-A6-4107-F7149	e5557d3d-e9ec-4249-abfc-4f84d612633a	TCGA-A6-4107	NO			NO		22	4	0	6A150B70-C49A-430E-B11B-C6A3E8607B8A			NO	No	YES	NO			YES		28	YES	NO	12	2	NO	0	0	5	2		No	M0	N1b	T3	4107		TUMOR FREE	YES	1.6	YES		NO
TCGA-A6-4107-11A	57	76.78.0	Nationwide Children's Hospital	TCGA-A6-4107-F7149	e5557d3d-e9ec-4249-abfc-4f84d612633a	TCGA-A6-4107	NO			NO		22	4	0	6A150B70-C49A-430E-B11B-C6A3E8607B8A			NO	No	YES	NO			YES		28	YES	NO	12	2	NO	0	0	5	2		No	M0	N1b	T3	4107		TUMOR FREE	YES	1.6	YES		NO
TCGA-AA-A022-01A	88	66.81.0	Nationwide Children's Hospital			TCGA-AA-A022	NO					22		0	261CE67A-71E5-4B5E-B001-DB28FE31691C			NO	No	YES	NO			NO		18	YES		12				0		0		No	M0	N0	T4	A022				1.51	YES
TCGA-AA-A022-11A	88	66.81.0	Nationwide Children's Hospital			TCGA-AA-A022	NO					22		0	261CE67A-71E5-4B5E-B001-DB28FE31691C			NO	No	YES	NO			NO		18	YES		12				0		0		No	M0	N0	T4	A022				1.51	YES
TCGA-AA-3667-01A	36	36.83.0	Nationwide Children's Hospital	TCGA-AA-3667-F37522	502C0404-DDE0-459C-AD14-9529830F55C3	TCGA-AA-3667	NO					22	3	0	5D109323-9967-4F22-BEBC-067AB5987FC3	Scheduled Follow-up Submission	Complete Remission/Response	NO	No	YES	NO			NO	NO	22	NO		12	12			0		0		No	M0	N0	T2	3667		TUMOR FREE	NO	0.45	YES	Complete Remission/Response	NO
TCGA-AA-3864-01A	71	41.78.0	Nationwide Children's Hospital	TCGA-AA-3864-F37994	3098EF39-C768-4CA8-8638-D0772354CF6D	TCGA-AA-3864	NO					22	8	0	DBB0926A-CDD4-41E3-813E-E6207125B67F	Scheduled Follow-up Submission	Complete Remission/Response	NO	No	YES	NO			NO	NO	21	NO		12	12			0		0		No	M0	N0	T3	3864		TUMOR FREE	NO	3.12	YES	Complete Remission/Response	NO
TCGA-A6-6137-01A	55	123.74.0	Nationwide Children's Hospital	TCGA-A6-6137-F18036	a37c30e7-467e-4fb3-8336-9cc8aeaa8e11	TCGA-A6-6137	NO			NO		22	3	0	930B8956-8FD5-4A62-B420-5AB360EBED70			YES	No	YES	NO					21	NO		12	11	YES		0		0		No	M0	N1c	T3	6137		TUMOR FREE	YES	2.2	YES		NO
TCGA-A6-6648-01A	56	123.74.0	Nationwide Children's Hospital	TCGA-A6-6648-F17988	e118640d-684b-463e-a65f-8a16cfde6344	TCGA-A6-6648	NO			NO		22	1	0	42BD93CD-41C5-4FB1-8C83-F7D7B89AB642				No	YES	YES		NO	YES		21	NO	NO	12	11	NO	0	1	5	0		No	M1a	N0	T3	6648		TUMOR FREE	YES	2.5	YES		NO
TCGA-DM-A1D0-01A	79	132.71.0	Nationwide Children's Hospital	TCGA-DM-A1D0-F19074	4D4AB934-A4DF-42E4-83A3-6DBEEAF81AE1	TCGA-DM-A1D0	YES	Normal				22	5	0	740891C6-4938-44C1-8FCC-B28FB85E33C1	Scheduled Follow-up Submission		NO	No	YES	YES	12	YES			10	NO	NO	12	12		0	0	4	2		No	M0	N0	T3	A1D0					YES
TCGA-AA-3678-01A	60	36.83.0	Nationwide Children's Hospital	TCGA-AA-3678-F38085	B25EE50A-4ED3-4E52-8722-931E8E9BAA95	TCGA-AA-3678	NO					22	10	0	1C6BDB2A-156A-49BE-A4FA-F97335CB50C4	Scheduled Follow-up Submission	Complete Remission/Response	NO	No	YES	NO			NO	NO	26	YES		12	12			0		1		No	M0	N1	T2	3678		TUMOR FREE	YES	2	YES	Complete Remission/Response	NO
TCGA-AZ-6606-01A	81	138.78.0	Nationwide Children's Hospital	TCGA-AZ-6606-F34172	4604BF3C-B5B2-45B2-86AA-DE805C7D7810	TCGA-AZ-6606						22	1	0	CD99B5A9-A589-4CE3-8E34-EF21329D34EC	Scheduled Follow-up Submission	Progressive Disease		No	YES					NO	17	YES		12	8					10		No	M1	N2	T4	6606	YES	WITH TUMOR	YES	10.6	YES	Progressive Disease	NO
TCGA-AZ-6606-11A	81	138.78.0	Nationwide Children's Hospital	TCGA-AZ-6606-F34172	4604BF3C-B5B2-45B2-86AA-DE805C7D7810	TCGA-AZ-6606						22	1	0	CD99B5A9-A589-4CE3-8E34-EF21329D34EC	Scheduled Follow-up Submission	Progressive Disease		No	YES					NO	17	YES		12	8					10		No	M1	N2	T4	6606	YES	WITH TUMOR	YES	10.6	YES	Progressive Disease	NO
TCGA-D5-6920-01A	77	157.71.0	Nationwide Children's Hospital	TCGA-D5-6920-F29706	7c51dfe2-d915-4be3-9762-f3ca3dfe4476	TCGA-D5-6920	NO			NO		22	26	0	871501FC-473D-4967-AB6C-5086E0A82B82	Scheduled Follow-up Submission		NO	No	YES	NO			NO		5	NO		12	3	NO		0		0	0	No	M0	N0	T3	6920	NO	TUMOR FREE	NO	1.7	YES		NO
TCGA-AA-3549-01A	69	28.86.0	Nationwide Children's Hospital	TCGA-AA-3549-F37507	A318169E-5927-47ED-B574-0D5F52F854AF	TCGA-AA-3549	NO					22	3	0	B6387546-55B4-4F70-B958-2510150D6C0D	Scheduled Follow-up Submission	Complete Remission/Response	YES	No	YES	NO			NO	NO	31	NO		12	12			0		0		No	M0	N0	T2	3549		TUMOR FREE	NO	0.76	YES	Complete Remission/Response	YES
TCGA-AA-3872-01A	45	41.78.0	Nationwide Children's Hospital			TCGA-AA-3872	NO					22		0	2E4A55EE-1D20-4AF2-84DD-E3F1084BEE08			NO	No	YES	NO			NO		29	YES		12				0		23		No	M1	N2	T4	3872					YES
TCGA-D5-6535-01A	80	116.77.0	Nationwide Children's Hospital	TCGA-D5-6535-F28924	4c8edf3f-088b-44b8-ac9a-3174e674e754	TCGA-D5-6535	NO		1	YES		22	2	0	EC155DA3-81A0-4E87-84C8-D0FDA8F92C48	Scheduled Follow-up Submission		NO	No	YES	NO					6	YES		12	3	YES				1		No	MX	N1	T3	6535	YES	TUMOR FREE	NO	66.7	YES		NO
TCGA-D5-6540-01A	66	116.77.0	Nationwide Children's Hospital	TCGA-D5-6540-F28626	3c36a5cb-a781-4214-bd44-b0491edcc689	TCGA-D5-6540				YES		22	27	0	C6D61BE1-C224-4058-838D-FCC7C4A08915	Scheduled Follow-up Submission		NO	No	YES	NO					13	NO		12	2	NO				0	0	No	M0	N0	T2	6540	NO	TUMOR FREE	NO	2	YES		NO
TCGA-DM-A1HB-01A	75	172.69.0	Nationwide Children's Hospital	TCGA-DM-A1HB-F19073	043C0172-CA50-4673-8F8B-1D3D02CAF515	TCGA-DM-A1HB	YES	Abnormal		NO		22	5	0	AD5BC667-3D76-487F-BDB8-2AE27BAD4F44	Scheduled Follow-up Submission		NO	No	YES	YES		NO			11	NO	YES	12	12		5	0	5	1		No	M0	N1	T3	A1HB					YES
TCGA-G4-6307-01A	37	116.77.0	Nationwide Children's Hospital	TCGA-G4-6307-F21940	59ed0f8f-0e78-4a58-820c-451e0ec019e9	TCGA-G4-6307	NO			YES		22	25	0	2C976F84-320F-4FD6-A237-148CA5ED7667	Scheduled Follow-up Submission			No	YES	NO					17	YES	NO	12	1	NO		0		2		No	M0	N1	T3	6307	NO	TUMOR FREE	YES	10.2	YES		NO
TCGA-D5-5540-01A	73	89.77.0	Nationwide Children's Hospital	TCGA-D5-5540-F13830	728155f4-e2fa-49bd-a4d1-7c478bb7215f	TCGA-D5-5540	NO		70	NO		22	4	0	653D2520-9BB4-4300-94C6-836B25AF3965	Scheduled Follow-up Submission		NO	No	YES	NO			NO		12	NO		12	7	NO		0		0	0	No	M0	N0	T3	5540	NO	TUMOR FREE	NO	1.7	YES		NO
TCGA-CM-6166-01A	48	89.77.0	Nationwide Children's Hospital	TCGA-CM-6166-F13935	1252f958-50a3-4119-b755-ed02e11638da	TCGA-CM-6166	NO			NO		22	19	0	68BA633B-B362-46B5-A60A-E5B41AFD43B6	Scheduled Follow-up Submission		NO	No	YES	NO			YES		33	NO		12	7	NO		0		0		No	M0	N0	T2	6166	NO	TUMOR FREE	NO	1.3	YES		NO
TCGA-DM-A1D9-01A	67	132.71.0	Nationwide Children's Hospital	TCGA-DM-A1D9-F19079	1639BA4A-7C03-4A96-B3A8-9E1AD72C9943	TCGA-DM-A1D9	NO			YES		22	5	0	D7AA1EAE-BE31-4851-A09D-A95395B0EA76	Scheduled Follow-up Submission		NO	No	YES	NO					28	NO	NO	12	12		0	1	5	0		No	M0	N0	T3	A1D9					YES
TCGA-D5-6923-01A	57	157.71.0	Nationwide Children's Hospital	TCGA-D5-6923-F29707	06ff532c-3574-460a-bab3-b2b370dece40	TCGA-D5-6923	NO		10	NO		22	26	0	78B018BF-9090-42A6-8946-99777AFAC133	Scheduled Follow-up Submission		NO	No	YES	NO			NO		11	NO	NO	12	3	NO		0		0	0	No	M0	N0	T2	6923	NO	TUMOR FREE	NO	1.8	YES		NO
TCGA-AA-3526-01A	57	28.86.0	Nationwide Children's Hospital	TCGA-AA-3526-F37308	A1C51A07-126C-44B3-AD37-202A4711211F	TCGA-AA-3526	NO					22	1	0	7058A15D-810B-41C6-9728-F19438555F6D	Scheduled Follow-up Submission	Complete Remission/Response	YES	No	YES	NO			NO	NO	17	NO		12	12			2		0		No	M0	N0	T2	3526		TUMOR FREE	NO	2.06	YES	Complete Remission/Response	NO
TCGA-AA-3526-11A	57	28.86.0	Nationwide Children's Hospital	TCGA-AA-3526-F37308	A1C51A07-126C-44B3-AD37-202A4711211F	TCGA-AA-3526	NO					22	1	0	7058A15D-810B-41C6-9728-F19438555F6D	Scheduled Follow-up Submission	Complete Remission/Response	YES	No	YES	NO			NO	NO	17	NO		12	12			2		0		No	M0	N0	T2	3526		TUMOR FREE	NO	2.06	YES	Complete Remission/Response	NO
TCGA-G4-6294-01A	75	123.74.0	Nationwide Children's Hospital	TCGA-G4-6294-F22034	62a43703-e6c3-4be9-83bd-d3d4e9e9d1b4	TCGA-G4-6294	NO			YES		22	21	0	18D0D7C5-364C-4B6C-9C63-42478D646D15	Scheduled Follow-up Submission		NO	No	YES	NO			NO		10	NO		12	2	NO		0		2		Yes	M1	N1	T3	6294	NO	WITH TUMOR	YES		YES		NO
TCGA-AA-3930-01A	66	41.78.0	Nationwide Children's Hospital	TCGA-AA-3930-F37985	4C38428C-E96C-4135-9E4E-0416F3A601A7	TCGA-AA-3930	NO					22	8	0	245C14C9-A3B5-4BFD-8915-08E6BC67F144	Scheduled Follow-up Submission	Progressive Disease	NO	No	YES	NO			NO	NO	29	YES		12	12			0		24		No	M1	N2	T3	3930		WITH TUMOR	YES		YES	Progressive Disease	NO
TCGA-AA-3854-01A	71	36.83.0	Nationwide Children's Hospital	TCGA-AA-3854-F38001	EB5A947D-2DD0-45E4-8D03-02B97240DA5C	TCGA-AA-3854	NO					22	8	0	EB31A0E7-DCD8-4831-80D0-E5EFF0E8FD0D	Scheduled Follow-up Submission	Complete Remission/Response	YES	No	YES	NO			NO	NO	12	YES		12	12			0		0		No	M0	N0	T2	3854		TUMOR FREE	NO		YES	Complete Remission/Response	NO
TCGA-SS-A7HO-01A	44	385.43.0	Nationwide Children's Hospital	TCGA-SS-A7HO-F71976	873C44EA-98EA-48F8-B615-B8157BB514C9	TCGA-SS-A7HO	NO		1	NO		22	31	0	C65A06B9-C9EF-43C6-A155-24052140B688	Scheduled Follow-up Submission		NO	No	YES	NO			NO	NO	25	YES		12	3	NO		0		0	0	No	M0	N0	T4a	A7HO	NO	WITH TUMOR	YES	0	YES	Complete Remission/Response	NO
TCGA-AD-5900-01A	67	89.77.0	Nationwide Children's Hospital	TCGA-AD-5900-F42776	F5239F86-7BB6-436A-BFD0-1B0C782886B1	TCGA-AD-5900				NO		22	30	0	655A25E9-37EE-4497-8623-C324EA3BADC4	Scheduled Follow-up Submission	Complete Remission/Response	NO	No	YES					NO	11	NO		12	4			0		0		No	MX	N0	T2	5900	NO		NO		YES	Complete Remission/Response	NO
TCGA-A6-6138-01A	61	123.74.0	Nationwide Children's Hospital	TCGA-A6-6138-F17937	ffbc6fdc-d573-42b5-bd3f-bf948012482b	TCGA-A6-6138	NO			YES		22	28	0	96B34E9C-1693-465D-8E59-99E28B97B082			NO	No	YES	NO					24	NO		12	10	NO		0		0		No	M0	N0	T2	6138		TUMOR FREE	NO	2.8	YES		NO
TCGA-CM-6170-01A	73	89.77.0	Nationwide Children's Hospital	TCGA-CM-6170-F13995	1e2d6522-acec-4c70-8901-6b46c3394708	TCGA-CM-6170	NO			YES		22	19	0	4A7946AE-D4FA-461B-9DDC-7A315314C84C	Scheduled Follow-up Submission		YES	No	YES	NO			NO		12	NO		12	7	NO		0		0		No	M0	N0	T2	6170	NO	TUMOR FREE	NO	0.8	YES		NO
TCGA-F4-6807-01A	51	138.78.0	Nationwide Children's Hospital	TCGA-F4-6807-F35069	87FD22DD-F8E5-4E3D-B0D7-30C94649F108	TCGA-F4-6807	NO			NO		22	14	0	82DE6931-CC6F-4390-977C-FEA49B236868	Scheduled Follow-up Submission	Complete Remission/Response	NO	No	YES	NO			NO	NO	12	NO	NO	12	9	NO	0		0	12	12	No	M0	N2b	T3	6807	NO	TUMOR FREE	YES		YES	Complete Remission/Response	NO
TCGA-G4-6311-01A	80	116.77.0	Nationwide Children's Hospital	TCGA-G4-6311-F21920	fff8f999-e75e-4ceb-881d-eaf85fc19430	TCGA-G4-6311	NO			NO		22	27	0	017FFD49-42A9-462C-940E-3C9322EBD077	Scheduled Follow-up Submission		NO	No	YES	NO			YES		37	YES	NO	12	1	NO		0		1		No	MX	N1	T3	6311	YES	TUMOR FREE	YES	0.9	YES		NO
TCGA-G4-6311-11A	80	116.77.0	Nationwide Children's Hospital	TCGA-G4-6311-F21920	fff8f999-e75e-4ceb-881d-eaf85fc19430	TCGA-G4-6311	NO			NO		22	27	0	017FFD49-42A9-462C-940E-3C9322EBD077	Scheduled Follow-up Submission		NO	No	YES	NO			YES		37	YES	NO	12	1	NO		0		1		No	MX	N1	T3	6311	YES	TUMOR FREE	YES	0.9	YES		NO
TCGA-AA-3522-01A	67	28.86.0	Nationwide Children's Hospital	TCGA-AA-3522-F37302	1F9782D5-2B86-4AB3-B873-EEBAAF45910D	TCGA-AA-3522	NO					22	1	0	2AB8D4B2-9A16-4969-A968-19FBBE44E4E3	Scheduled Follow-up Submission	Complete Remission/Response	YES	No	YES	NO			NO	NO	18	YES		12	12			0		0		Yes	M0	N0	T3	3522		TUMOR FREE	NO	0.96	YES	Complete Remission/Response	NO
TCGA-AA-3522-11A	67	28.86.0	Nationwide Children's Hospital	TCGA-AA-3522-F37302	1F9782D5-2B86-4AB3-B873-EEBAAF45910D	TCGA-AA-3522	NO					22	1	0	2AB8D4B2-9A16-4969-A968-19FBBE44E4E3	Scheduled Follow-up Submission	Complete Remission/Response	YES	No	YES	NO			NO	NO	18	YES		12	12			0		0		Yes	M0	N0	T3	3522		TUMOR FREE	NO	0.96	YES	Complete Remission/Response	NO
TCGA-AZ-4614-01A	71	76.78.0	Nationwide Children's Hospital	TCGA-AZ-4614-F19856	2dfe3fab-275b-44f2-a179-cd71f09078c1	TCGA-AZ-4614						22	30	0	B86C8E98-C970-44FC-AD91-BB86C0D9D0BD				No	YES						4	YES		12	12	NO				2		No	M1	N1	T4a	4614	NO	WITH TUMOR	NO	49.7	YES		NO
TCGA-AA-3553-01A	61	28.86.0	Nationwide Children's Hospital	TCGA-AA-3553-F37509	29DBF706-091A-4486-8574-F8A7D2ACCAF1	TCGA-AA-3553	NO					22	3	0	5D898B39-0B31-4E8D-9363-47E64E406068	Scheduled Follow-up Submission	Complete Remission/Response	YES	No	YES	NO			NO	NO	21	NO		12	12			0		0		No	M0	N0	T2	3553		TUMOR FREE	NO		YES	Complete Remission/Response	NO
TCGA-G4-6297-01A	55	116.77.0	Nationwide Children's Hospital	TCGA-G4-6297-F22065	e4410ad5-024d-4692-b74e-a2b2c5c9f472	TCGA-G4-6297	NO			YES		22	19	0	EF5D8C08-1709-499C-858F-3ADBC9C4E1AC	Scheduled Follow-up Submission		YES	No	YES	NO			NO		36	YES		12	1	NO		0		6		No	M1	N2	T3	6297	YES	WITH TUMOR	YES		YES		NO
TCGA-G4-6297-11A	55	116.77.0	Nationwide Children's Hospital	TCGA-G4-6297-F22065	e4410ad5-024d-4692-b74e-a2b2c5c9f472	TCGA-G4-6297	NO			YES		22	19	0	EF5D8C08-1709-499C-858F-3ADBC9C4E1AC	Scheduled Follow-up Submission		YES	No	YES	NO			NO		36	YES		12	1	NO		0		6		No	M1	N2	T3	6297	YES	WITH TUMOR	YES		YES		NO
TCGA-AA-3502-01A	73	76.78.0	Nationwide Children's Hospital	TCGA-AA-3502-F37275	26FD1E03-8B6A-46D4-A2B1-FEDFA68A3E53	TCGA-AA-3502	NO					22	1	0	68B84933-F794-4216-B45E-973B20C2651E	Scheduled Follow-up Submission		YES	No	YES	NO			NO	NO	31			12	12			0		0		No	M0	N0	T2	3502			NO	3.7	YES	Complete Remission/Response	NO
TCGA-AA-3502-11A	73	76.78.0	Nationwide Children's Hospital	TCGA-AA-3502-F37275	26FD1E03-8B6A-46D4-A2B1-FEDFA68A3E53	TCGA-AA-3502	NO					22	1	0	68B84933-F794-4216-B45E-973B20C2651E	Scheduled Follow-up Submission		YES	No	YES	NO			NO	NO	31			12	12			0		0		No	M0	N0	T2	3502			NO	3.7	YES	Complete Remission/Response	NO
TCGA-CM-4744-01A	69	76.78.0	Nationwide Children's Hospital	TCGA-CM-4744-F6608	58eddeb6-3065-4010-9323-05fc35f4e2f2	TCGA-CM-4744	NO			YES		22	24	0	9E7A317F-74A2-4D6F-AB91-FB432B9C6CF0			YES	No	YES	NO			NO		28	YES		12	1	NO		0		0		No	M0	N0	T2	4744	NO	TUMOR FREE	NO	0.9	YES		NO
TCGA-AZ-6601-01A	68	123.74.0	Nationwide Children's Hospital	TCGA-AZ-6601-F34152	A281F12A-3018-4200-8C91-6824D8128D05	TCGA-AZ-6601						22	31	0	DEED8A4D-5B4F-4A99-A458-E3D34A8848D4	Scheduled Follow-up Submission	Progressive Disease		No	YES					NO	11	YES		12	7					0		Yes	M0	N0	T3	6601	YES	WITH TUMOR	NO	1.8	YES	Progressive Disease	NO
TCGA-AZ-6601-11A	68	123.74.0	Nationwide Children's Hospital	TCGA-AZ-6601-F34152	A281F12A-3018-4200-8C91-6824D8128D05	TCGA-AZ-6601						22	31	0	DEED8A4D-5B4F-4A99-A458-E3D34A8848D4	Scheduled Follow-up Submission	Progressive Disease		No	YES					NO	11	YES		12	7					0		Yes	M0	N0	T3	6601	YES	WITH TUMOR	NO	1.8	YES	Progressive Disease	NO
TCGA-D5-6928-01A	80	157.71.0	Nationwide Children's Hospital	TCGA-D5-6928-F29714	4379456e-4118-4173-abde-f743c00e081b	TCGA-D5-6928	NO		65	NO		22	28	0	CDD5226B-D661-4CB7-8EAE-C3C3BC760F7B	Scheduled Follow-up Submission		NO	No	YES	NO			NO		18	NO	NO	12	3	NO		0		0		No	M0	N0	T3	6928	NO	TUMOR FREE	NO	1.8	YES		NO
TCGA-AA-A02Y-01A	73	66.81.0	Nationwide Children's Hospital	TCGA-AA-A02Y-F37278	3AF503B2-8405-4BFD-A28D-3CE34F771865	TCGA-AA-A02Y	NO					22	1	0	E1276D72-3947-48BC-8F0A-94ABD667F5CF	Scheduled Follow-up Submission	Complete Remission/Response	NO	No	YES	NO			NO	NO	18	YES		12	12			0		0		No	M0	N0	T2	A02Y		TUMOR FREE	NO	0.98	YES	Complete Remission/Response	NO
TCGA-G4-6310-01A	69	116.77.0	Nationwide Children's Hospital	TCGA-G4-6310-F21927	3d26dfa2-5342-49fc-9e8c-67fb064d7cfa	TCGA-G4-6310	NO		8	NO		22	25	0	05350918-73E0-4299-8797-272CFAD4437A	Scheduled Follow-up Submission		NO	No	YES	NO			YES		66	NO	NO	12	1	NO		0		1		Yes	M0	N1	T3	6310	NO	TUMOR FREE	YES		YES		YES
TCGA-AA-3867-01A	74	41.78.0	Nationwide Children's Hospital	TCGA-AA-3867-F37990	9D943DE2-F368-4514-B60D-2AD6315A5DA9	TCGA-AA-3867	NO					22	8	0	96E3D2E8-E012-4ECA-9855-6ECEC66EC586	Scheduled Follow-up Submission		YES	No	YES	NO			NO	NO	24	YES		12	12			0		4		Yes	M1	N2	T3	3867		WITH TUMOR	NO	304.5	YES		NO
TCGA-DM-A1D7-01A	82	132.71.0	Nationwide Children's Hospital	TCGA-DM-A1D7-F19040	DA01E4AE-0CFA-4D8F-989A-3576230E8D13	TCGA-DM-A1D7	YES	Normal				22	2	0	5DA8AAB6-9C07-477B-8BD6-000FD2EA3365	Additional New Tumor Event			No	YES	YES		NO			15	NO	NO	12	12		0	0	5	0		No	M0	N0	T3	A1D7					YES
TCGA-AZ-5403-01A	43	89.77.0	Nationwide Children's Hospital	TCGA-AZ-5403-F32209	c08f9325-5b69-41d4-9706-4256f974f1e5	TCGA-AZ-5403			65			22	18	0	85F81361-FA04-436B-B53A-89268485CCEA	Scheduled Follow-up Submission			No	YES						12	NO		12	5	NO		0		0		No	MX	N0	T3	5403	YES	WITH TUMOR	NO	2.3	YES		NO
TCGA-NH-A6GB-01A	71	385.43.0	Nationwide Children's Hospital	TCGA-NH-A6GB-F64052	FB304E65-E495-4720-AAB8-1DED76C06642	TCGA-NH-A6GB	NO		25	NO		22	25	0	72ABF7D2-5CCA-4526-9292-8A407C53C9D4	Scheduled Follow-up Submission	Progressive Disease		No	YES	YES		NO	NO	NO	13	NO		12	8	NO		1		7		No	MX	N2b	T3	A6GB	NO	WITH TUMOR	YES		YES	Progressive Disease	NO
TCGA-AA-3837-01A	67	36.83.0	Nationwide Children's Hospital	TCGA-AA-3837-F38115	AC108FF4-DD05-45FD-9BA6-53CD0927D398	TCGA-AA-3837	NO					22	10	0	E7F377EC-4D28-4906-B7F5-50A3121AD360	Scheduled Follow-up Submission	Complete Remission/Response	YES	No	YES	NO			NO	NO	36	YES		12	12			2		0		No	M0	N0	T3	3837		TUMOR FREE	NO		YES	Complete Remission/Response	NO
TCGA-CM-6165-01A	74	89.77.0	Nationwide Children's Hospital	TCGA-CM-6165-F13933	73ad0a22-ccd0-4a1a-a5c3-df8bbf673861	TCGA-CM-6165	NO			NO		22	19	0	0CC634EB-1AB8-411C-AEFA-89210881985E	Scheduled Follow-up Submission		NO	No	YES	NO			NO		20	NO		12	7	NO		0		0		No	M0	N0	T3	6165	NO	TUMOR FREE	NO	1.9	YES		NO
TCGA-QG-A5Z2-01A	61	300.56.0	Nationwide Children's Hospital	TCGA-QG-A5Z2-F58666	374D3867-2F01-4A24-9A99-5E4E95FDE2A6	TCGA-QG-A5Z2	NO			YES		22	18	0	BA26BFB1-D240-4E16-9A74-FD41579D7CC6	Scheduled Follow-up Submission	Complete Remission/Response	NO	No	YES	NO			NO	NO	23	NO		12	4			0		0		No	M0	N0	T2	A5Z2	NO	TUMOR FREE	NO	1.52	YES	Complete Remission/Response	NO
TCGA-CM-5348-01A	72	116.77.0	Nationwide Children's Hospital	TCGA-CM-5348-F11073	3c365d30-5309-45a7-b628-7d656b45cafb	TCGA-CM-5348	NO			YES		22	3	0	971E396B-021C-47E5-B7D4-5CF8A04945BF			YES	No	YES	NO			NO		19	YES		12	5	NO		0		1		No	M0	N1a	T3	5348	YES	TUMOR FREE	NO	3.6	YES		NO
TCGA-AD-6963-01A	58	157.71.0	Nationwide Children's Hospital	TCGA-AD-6963-F47190	3BFE1894-8F19-4850-8F76-C5DA73AAF49A	TCGA-AD-6963	NO		48			22	22	0	AAAB3374-2B62-437D-8783-FEF44F484502	Scheduled Follow-up Submission	Complete Remission/Response		No	YES	NO			NO	NO	12	NO		12	8	NO		2		0		No	MX	N0	T3	6963		TUMOR FREE	NO	5.5	YES	Complete Remission/Response	NO
TCGA-AA-3511-01A	64	138.78.0	Nationwide Children's Hospital	TCGA-AA-3511-F37282	0455CE0A-2E50-467D-A71B-B5B65FD7ED51	TCGA-AA-3511	NO					22	1	0	C0E7EAF8-833F-4D99-8D40-20C46FC1131C	Scheduled Follow-up Submission	Complete Remission/Response	NO	No	YES	NO			NO	NO	36	YES		12	12			0		0		No	M0	N0	T4	3511		TUMOR FREE	NO	35.95	YES	Complete Remission/Response	NO
TCGA-AA-3511-11A	64	138.78.0	Nationwide Children's Hospital	TCGA-AA-3511-F37282	0455CE0A-2E50-467D-A71B-B5B65FD7ED51	TCGA-AA-3511	NO					22	1	0	C0E7EAF8-833F-4D99-8D40-20C46FC1131C	Scheduled Follow-up Submission	Complete Remission/Response	NO	No	YES	NO			NO	NO	36	YES		12	12			0		0		No	M0	N0	T4	3511		TUMOR FREE	NO	35.95	YES	Complete Remission/Response	NO
TCGA-D5-6532-01A	61	116.77.0	Nationwide Children's Hospital	TCGA-D5-6532-F28623	20ad0e10-8b26-4e04-afa5-99b9f2f686ef	TCGA-D5-6532			10			22	27	0	9EFBEBF5-3647-468F-8CF3-9C50D5C803BB	Scheduled Follow-up Submission		NO	No	YES	NO					10	NO		12	2	NO				0	0	No	M0	N0	T3	6532	NO	TUMOR FREE	NO	1.7	YES		NO
TCGA-DM-A28F-01A	73	154.69.0	Nationwide Children's Hospital	TCGA-DM-A28F-F19066	7402E1C9-2010-4212-9C2F-B89E2583811A	TCGA-DM-A28F	YES	Normal		YES		22	2	0	589B41B4-3F5E-4CB0-96DD-142FA39EC465	Scheduled Follow-up Submission		YES	No	YES	YES		NO			23		NO	12	12		0	2	7	1		No	M0	N1	T3	A28F					YES
TCGA-A6-5661-01A	80	89.77.0	Nationwide Children's Hospital	TCGA-A6-5661-F12339	4597b875-a4a6-4c87-9d2e-bf4b05f03c69	TCGA-A6-5661	NO			YES		22	27	0	FBBBF827-3416-4231-8DA3-3C149C08429D			YES	No	YES	NO			YES		21	NO	YES	12	5	NO	5	2	5	0		No	M0	N0	T3	5661		TUMOR FREE	NO	4.1	YES		NO
TCGA-A6-5661-01B	80	89.77.0	Nationwide Children's Hospital	TCGA-A6-5661-F12339	4597b875-a4a6-4c87-9d2e-bf4b05f03c69	TCGA-A6-5661	NO			YES		22	27	0	FBBBF827-3416-4231-8DA3-3C149C08429D			YES	No	YES	NO			YES		21	NO	YES	12	5	NO	5	2	5	0		No	M0	N0	T3	5661		TUMOR FREE	NO	4.1	YES		NO
TCGA-A6-5661-11A	80	89.77.0	Nationwide Children's Hospital	TCGA-A6-5661-F12339	4597b875-a4a6-4c87-9d2e-bf4b05f03c69	TCGA-A6-5661	NO			YES		22	27	0	FBBBF827-3416-4231-8DA3-3C149C08429D			YES	No	YES	NO			YES		21	NO	YES	12	5	NO	5	2	5	0		No	M0	N0	T3	5661		TUMOR FREE	NO	4.1	YES		NO
TCGA-AZ-4308-01A	47	76.78.0	Nationwide Children's Hospital	TCGA-AZ-4308-F19852	b227cfa3-9e85-4720-b2b8-903b59232ca6	TCGA-AZ-4308			1			22	30	0	87BFB22B-3D57-44FE-AF0C-84E4BB6F083B				No	YES				YES		14	YES	NO	12	12		0		5	3		No	M0	N1	T3	4308	NO	TUMOR FREE	YES	0.5	YES		NO
TCGA-G4-6586-01A	73	123.74.0	Nationwide Children's Hospital	TCGA-G4-6586-F21888	ca0e57d3-a4db-4194-ab5c-3fd15caa2377	TCGA-G4-6586	NO			NO		22	31	0	77C149D2-96B6-4EBB-B195-0A57B55B1EA7	Scheduled Follow-up Submission		NO	No	YES	NO			NO		17	YES		12	1	NO		1		0		Yes	M0	N0	T3	6586	NO	TUMOR FREE	NO		YES		NO
TCGA-AA-3845-01A	86	41.78.0	Nationwide Children's Hospital			TCGA-AA-3845	NO					22		0	C696E736-A7AE-4138-9AED-5BE0F899C0C4			NO	No	YES	NO			NO		12	YES		12				0		0		No	M0	N0	T3	3845					YES
TCGA-AA-A01P-01A	80	66.81.0	Nationwide Children's Hospital	TCGA-AA-A01P-F37297	3ACB864C-2C63-4A17-B328-9B4146D83682	TCGA-AA-A01P	NO					22	1	0	E2DA0BCE-5657-450B-A26C-0BA7BB95959F	Scheduled Follow-up Submission		NO	No	YES	NO			NO	NO	21	YES		12	12			0		1		No	M0	N1	T3	A01P			NO	1.11	YES		NO
TCGA-AA-A01P-11A	80	66.81.0	Nationwide Children's Hospital	TCGA-AA-A01P-F37297	3ACB864C-2C63-4A17-B328-9B4146D83682	TCGA-AA-A01P	NO					22	1	0	E2DA0BCE-5657-450B-A26C-0BA7BB95959F	Scheduled Follow-up Submission		NO	No	YES	NO			NO	NO	21	YES		12	12			0		1		No	M0	N1	T3	A01P			NO	1.11	YES		NO
TCGA-AZ-4682-01B	61	76.78.0	Nationwide Children's Hospital	TCGA-AZ-4682-F19860	0362c34c-8577-47bf-b8c3-03677d2ee7c0	TCGA-AZ-4682						22	30	0	9EFA37E3-C427-4D77-9B4C-D75827693665				No	YES						3	NO		12	12	YES				0		No	M1	N0	T3	4682		WITH TUMOR	YES		YES		NO
TCGA-D5-6927-01A	34	157.71.0	Nationwide Children's Hospital	TCGA-D5-6927-F29715	3badbc1c-a0fe-42fc-9fb0-504bde8ae2a9	TCGA-D5-6927	NO		13	NO		22	28	0	A3EE9AEA-E4D1-453A-BEC2-6F2343275193	Scheduled Follow-up Submission		NO	No	YES	NO			NO		16	NO	NO	12	3	NO		1		0		No	M0	N0	T3	6927	NO	TUMOR FREE	NO	0.9	YES		NO
TCGA-F4-6569-01A	60	123.74.0	Nationwide Children's Hospital	TCGA-F4-6569-F29718	BBB2FCC3-A627-4B43-8AE4-EFF5AFC25D8B	TCGA-F4-6569	NO					22	19	0	4D3994BB-89DE-48F4-B333-AF3576040A5F	Scheduled Follow-up Submission			No	YES	NO					19	NO		12	3	NO		0		0	0	No	M0	N0	T2	6569	NO	TUMOR FREE	YES		YES		NO
TCGA-AA-3949-01A	87	41.78.0	Nationwide Children's Hospital	TCGA-AA-3949-F37981	AEF77669-A4D5-4595-B86E-5001F2BCDEE8	TCGA-AA-3949	NO					22	8	0	181145D3-5FA0-4FBA-AC03-2C83CEAA5B65	Scheduled Follow-up Submission	Complete Remission/Response	NO	No	YES	NO			NO	NO	19	NO		12	12			0		3		No	M0	N1	T3	3949		TUMOR FREE	NO		YES	Complete Remission/Response	NO
TCGA-AD-A5EJ-01A	74	300.56.0	Nationwide Children's Hospital			TCGA-AD-A5EJ			1	YES		22		0	D6B59AC1-30C6-48CD-A3CC-EB424C26B7F1				No	YES						32	NO		12		NO				0		No	MX	N0	T3	A5EJ	NO				YES
TCGA-A6-2672-01A	82	29.82.0	Nationwide Children's Hospital	TCGA-A6-2672-F2080	49e421b1-e78f-4fec-a3e8-d82944961098	TCGA-A6-2672	NO			NO		22	7	0	775CDD1E-8C8D-4173-9AA1-13B39D480018			YES	No	YES	NO					29	YES		12	10	NO		0		1		No	M0	N1	T3	2672		TUMOR FREE	NO	3.4	YES		NO
TCGA-A6-2672-01B	82	29.82.0	Nationwide Children's Hospital	TCGA-A6-2672-F2080	49e421b1-e78f-4fec-a3e8-d82944961098	TCGA-A6-2672	NO			NO		22	7	0	775CDD1E-8C8D-4173-9AA1-13B39D480018			YES	No	YES	NO					29	YES		12	10	NO		0		1		No	M0	N1	T3	2672		TUMOR FREE	NO	3.4	YES		NO
TCGA-A6-2672-11A	82	29.82.0	Nationwide Children's Hospital	TCGA-A6-2672-F2080	49e421b1-e78f-4fec-a3e8-d82944961098	TCGA-A6-2672	NO			NO		22	7	0	775CDD1E-8C8D-4173-9AA1-13B39D480018			YES	No	YES	NO					29	YES		12	10	NO		0		1		No	M0	N1	T3	2672		TUMOR FREE	NO	3.4	YES		NO
TCGA-F4-6463-01A	51	116.77.0	Nationwide Children's Hospital	TCGA-F4-6463-F29713	AB1EE0F1-5753-4E0B-B5E0-A6396B494BB3	TCGA-F4-6463	NO					22	28	0	15D9DED5-F3FB-4971-ACDC-314EB5A6E072	Scheduled Follow-up Submission			No	YES	NO					18	NO		12	3	NO		0		0	0	No	M0	N0	T3	6463	NO	TUMOR FREE	NO		YES		NO
TCGA-AY-A54L-01A	74	300.56.0	Nationwide Children's Hospital	TCGA-AY-A54L-F55757	147E0DA1-63D4-426F-A6F1-871537C1A230	TCGA-AY-A54L				NO		22	14	0	18FF32FE-18AA-4BD0-9A8F-AF69377E3CA7	Scheduled Follow-up Submission	Partial Remission/Response	NO	No	YES				YES	NO	24	NO	NO	12	1	NO		1		0		No	M0	N0	T2	A54L	NO	WITH TUMOR	NO	2.5	YES	Complete Remission/Response	NO
TCGA-CM-6678-01A	63	138.78.0	Nationwide Children's Hospital	TCGA-CM-6678-F15658	d71fff85-b23d-40f1-a031-2f55c6405b23	TCGA-CM-6678	YES	Normal		NO		22		0	A694F624-65DE-4C0B-BEF4-AB1B44851617	Scheduled Follow-up Submission		NO	No	YES	YES	12	YES	NO		19	NO		12	8	YES		1		0		No	M1a	N1c	T4a	6678	NO	TUMOR FREE	YES	286.6	YES		NO
TCGA-D5-6898-01A	51	157.71.0	Nationwide Children's Hospital	TCGA-D5-6898-F29704	1d4ecc0c-2e03-4d83-8d35-9eed43623f72	TCGA-D5-6898	NO		23	NO		22	28	0	1E975B5B-1B00-445C-8AF3-98EDA6D9268C	Scheduled Follow-up Submission		NO	No	YES	NO			NO		8	NO	NO	12	3	NO		0		0		No	M0	N0	T2	6898	NO	TUMOR FREE	NO	8.1	YES		NO
TCGA-NH-A8F8-01A	79	422.38.0	Nationwide Children's Hospital	TCGA-NH-A8F8-F67097	1DA4F0B8-1AEC-47E8-8B55-F9FB0F18A2F1	TCGA-NH-A8F8	NO		80	NO		22	30	0	90AAD9C3-CAE9-49A3-85D9-50A4FBBB35C9	Scheduled Follow-up Submission		YES	No	YES	YES	12	YES	NO	NO	22	YES	NO	12	10	YES		0		15		No	M1	N2b	T4a	A8F8	NO	WITH TUMOR	YES	24.9	YES		NO
TCGA-A6-6140-01A	62	123.74.0	Nationwide Children's Hospital	TCGA-A6-6140-F20353	2d883e40-6e47-469d-996d-6e59563a0f28	TCGA-A6-6140	NO			NO		22	16	0	C7B64D00-909C-4878-8F34-7ED9DC8A2512			NO	No	YES	NO					46	NO		12	1	NO		0		0		No	M0	N0	T3	6140		TUMOR FREE	YES	1.3	YES		NO
TCGA-CK-4952-01A	48	116.77.0	Nationwide Children's Hospital	TCGA-CK-4952-F9748	112c687f-cc16-4102-a7d3-eaf410addfa1	TCGA-CK-4952	NO		21	NO		22	31	0	32BF9E6B-7E05-4093-AF5E-4AE5FE499EAB			NO	No	YES	NO			NO		31	NO	NO	12	3	NO	0		10	5	0	No	M0	N2	T4	4952	NO	TUMOR FREE			YES
TCGA-AD-6548-01A	81	138.78.0	Nationwide Children's Hospital	TCGA-AD-6548-F42777	D4B7D882-E20C-4891-B587-258174C8B3BB	TCGA-AD-6548			4	YES		22	30	0	E8717F1B-A1A9-4669-B23D-73C94D612BDC	Scheduled Follow-up Submission	Complete Remission/Response	YES	No	YES					NO	12	NO		12	4			0		0		No	M0	N0	T2	6548		TUMOR FREE	NO	2.6	YES	Complete Remission/Response	NO
TCGA-G4-6320-01A	73	116.77.0	Nationwide Children's Hospital	TCGA-G4-6320-F21910	cb06e666-d3ef-4c7c-a79a-4c1ac6ab428c	TCGA-G4-6320	NO			YES		22	30	0	DEA9700D-1646-4BA3-81CA-BADF7A90E0BC	Scheduled Follow-up Submission		NO	No	YES	NO			NO		65	YES		12	1	NO		0		2		No	MX	N1	T3	6320	NO	TUMOR FREE	YES	2.7	YES		NO
TCGA-G4-6320-11A	73	116.77.0	Nationwide Children's Hospital	TCGA-G4-6320-F21910	cb06e666-d3ef-4c7c-a79a-4c1ac6ab428c	TCGA-G4-6320	NO			YES		22	30	0	DEA9700D-1646-4BA3-81CA-BADF7A90E0BC	Scheduled Follow-up Submission		NO	No	YES	NO			NO		65	YES		12	1	NO		0		2		No	MX	N1	T3	6320	NO	TUMOR FREE	YES	2.7	YES		NO
TCGA-AA-A00J-01A	80	30.80.0	Nationwide Children's Hospital	TCGA-AA-A00J-F37934	58F5600A-7ED6-4DE3-8793-E927257C4EF3	TCGA-AA-A00J	NO					22	6	0	771B774A-97AC-4015-B361-0B9A26B00D97	Scheduled Follow-up Submission	Partial Remission/Response	YES	No	YES	NO			NO	NO	24	YES		12	12			0		2		No	M0	N1	T4	A00J		TUMOR FREE	YES		YES	Partial Remission/Response	NO
TCGA-AA-3496-01A	83	138.78.0	Nationwide Children's Hospital			TCGA-AA-3496	NO					22		0	3D1AD2FD-EFC5-4F91-9441-01624ED0F170			NO	No	YES	NO			NO		23			12				0		0		Yes	M0	N0	T3	3496				0.2	YES
TCGA-AA-3496-11A	83	138.78.0	Nationwide Children's Hospital			TCGA-AA-3496	NO					22		0	3D1AD2FD-EFC5-4F91-9441-01624ED0F170			NO	No	YES	NO			NO		23			12				0		0		Yes	M0	N0	T3	3496				0.2	YES
TCGA-F4-6459-01A	61	123.74.0	Nationwide Children's Hospital	TCGA-F4-6459-F29831	05EBC8EB-FA35-4BE4-9E17-29A5F91E2AA7	TCGA-F4-6459	NO			NO		22	29	0	3DCE3537-6463-4142-9A6E-8B012E727890	Scheduled Follow-up Submission		NO	No	YES	NO			NO		6	NO		12	3	NO				6	0	No	M0	N2a	T3	6459	NO	TUMOR FREE	NO		YES		NO
TCGA-CM-5861-01A	63	89.77.0	Nationwide Children's Hospital	TCGA-CM-5861-F13889	64d79a4f-f5e1-4f5d-9335-4fede65e8aa5	TCGA-CM-5861				NO		22	18	0	477D472D-8EA6-4561-A815-EE3826D77D7A	Scheduled Follow-up Submission		NO	No	YES	NO			NO		28	NO		12	7	NO		0		0		No	M0	N0	T3	5861	YES	TUMOR FREE	NO	3.2	YES		NO
TCGA-CK-6746-01A	84	138.78.0	Nationwide Children's Hospital	TCGA-CK-6746-F14824	1befcb0c-afb7-40c0-b4ae-cb5807cabcab	TCGA-CK-6746	NO		20	NO		22		0	B91D3B36-347A-496C-9372-51DFB14AC0FC			NO	No	YES	NO			YES			NO		12	8	NO						No	MX	N0	T4b	6746	YES	TUMOR FREE	NO
TCGA-AY-4071-01A	63	45.80.0	Nationwide Children's Hospital	TCGA-AY-4071-F10086	4fb84d41-5c59-47e8-a4a2-025ed838701f	TCGA-AY-4071	NO			YES		22	7	0	CB544AA8-ADEA-4EBF-BFD5-7FF991743C87			YES	No	YES	NO			NO		25	NO		12	4	NO		0		0		No		N0	T1	4071	NO	TUMOR FREE	NO	6	YES		NO
TCGA-A6-6649-01A	66	123.74.0	Nationwide Children's Hospital	TCGA-A6-6649-F19130	94a3ae6f-1301-4a8f-8cc1-bccc72c5b005	TCGA-A6-6649	NO			YES		22	2	0	569764C2-DC6F-46CE-A6EE-CEDA98A1B6E7			YES	No	YES	NO					23	YES		12	12	YES		0		2		Yes	M0	N1b	T3	6649	YES	TUMOR FREE	YES	10.9	YES		NO
TCGA-NH-A50T-01A	68	300.56.0	Nationwide Children's Hospital	TCGA-NH-A50T-F50647	D9756179-A885-4B19-A492-F11FF3522066	TCGA-NH-A50T	NO			NO		22	28	0	11A1FE0B-F17D-4CA1-9451-BD2DD1C3133D	Scheduled Follow-up Submission	Complete Remission/Response	NO	No	YES	NO				NO	10	NO	NO	12	10	YES		0		0	0	No	MX	N0	T3	A50T	NO	TUMOR FREE	NO	1.4	YES	Complete Remission/Response	NO
TCGA-DM-A285-01A	71	154.69.0	Nationwide Children's Hospital	TCGA-DM-A285-F19064	092D6CE5-DC12-4656-ADBA-1C40E4682633	TCGA-DM-A285	YES	Normal		YES		22	2	0	50EEFC17-C5FB-43AC-BFC6-5AC9F7BAB25B	Scheduled Follow-up Submission		YES	No	YES	YES		NO			18		NO	12	12		0	0		11		Yes	M1	N2	T3	A285					YES
TCGA-AA-A00U-01A	50	30.80.0	Nationwide Children's Hospital	TCGA-AA-A00U-F37314	68EDBD99-5315-477A-A969-8A979FD02A8F	TCGA-AA-A00U	NO					22	1	0	51348B30-BD7F-4154-A115-FA89039C2CF2	Scheduled Follow-up Submission	Complete Remission/Response	YES	No	YES	NO			NO	NO		NO		12	12			0				No	M0	N1	T3	A00U		TUMOR FREE	YES		YES	Complete Remission/Response	NO
TCGA-AA-3970-01A	65	41.78.0	Nationwide Children's Hospital	TCGA-AA-3970-F37949	FF73958F-360C-43C3-9677-3E75FB84464B	TCGA-AA-3970	NO					22	6	0	CABD5248-CD67-4F9B-8D53-5B8572BCBCA2	Scheduled Follow-up Submission	Complete Remission/Response	YES	No	YES	NO			NO	NO	27	NO		12	12			0		0		No	M0	N0	T3	3970		TUMOR FREE	NO		YES	Complete Remission/Response	NO
TCGA-AA-A01D-01A	47	33.79.0	Nationwide Children's Hospital	TCGA-AA-A01D-F37305	26344A26-417D-42DC-B6A6-3C793D445365	TCGA-AA-A01D	NO					22	1	0	410337C2-82E3-4E97-AB6E-1BCABDE71C72	Scheduled Follow-up Submission	Progressive Disease	NO	No	YES	NO			NO	NO	12	YES		12	12			0		12		No	M0	N2	T3	A01D		WITH TUMOR	YES		YES	Progressive Disease	NO
TCGA-AA-3542-01A	69	28.86.0	Nationwide Children's Hospital	TCGA-AA-3542-F37322	FB094A2F-6E19-4AB1-8D1F-78D3895A57CD	TCGA-AA-3542	NO					22	1	0	F92359FE-5A53-42B3-8F8E-23E4910B1958	Scheduled Follow-up Submission	Complete Remission/Response	YES	No	YES	NO			NO	NO	18	YES		12	12			1		4		No	M0	N2	T3	3542		TUMOR FREE	YES	1.93	YES	Complete Remission/Response	NO
TCGA-AA-A00N-01A	75	33.79.0	Nationwide Children's Hospital			TCGA-AA-A00N	NO					22		0	40F14FB6-2255-4CC0-9842-F2C982791DD6			YES	No	YES	NO			NO		21	YES		12				0		0		No	M0	N0	T4	A00N				9.01	YES
TCGA-D5-6534-01A	62	157.71.0	Nationwide Children's Hospital	TCGA-D5-6534-F58486	9714D280-AEF1-4D26-8D99-3CF1C7FA5DB8	TCGA-D5-6534	NO			YES		22	11	0	C0ACF7A4-0CA1-4C87-9A60-611C3D54E949	Scheduled Follow-up Submission	Complete Remission/Response	YES	No	YES	NO				NO	22	NO		12	4	NO				0		No	M0	N0	T3	6534	YES	TUMOR FREE	NO	0.9	YES	Complete Remission/Response	NO
TCGA-AA-3852-01A	88	36.83.0	Nationwide Children's Hospital			TCGA-AA-3852	NO					22		0	55A5B638-59DA-46AA-87B7-536C465C6A7F			YES	No	YES	NO			NO		13	YES		12				0		0		No	M0	N0	T3	3852					YES
TCGA-AA-3530-01A	80	41.78.0	Nationwide Children's Hospital	TCGA-AA-3530-F37312	60CACA5D-BC3E-4B00-977D-744A56DB765E	TCGA-AA-3530	NO					22	1	0	7D5C4615-94F1-4C00-B580-734372258C8E	Scheduled Follow-up Submission	Complete Remission/Response	YES	No	YES	NO			NO	NO	24	NO		12	12			0		0		Yes	M0	N0	T2	3530		TUMOR FREE	NO	1.88	YES	Complete Remission/Response	NO
TCGA-AA-3530-11A	80	41.78.0	Nationwide Children's Hospital	TCGA-AA-3530-F37312	60CACA5D-BC3E-4B00-977D-744A56DB765E	TCGA-AA-3530	NO					22	1	0	7D5C4615-94F1-4C00-B580-734372258C8E	Scheduled Follow-up Submission	Complete Remission/Response	YES	No	YES	NO			NO	NO	24	NO		12	12			0		0		Yes	M0	N0	T2	3530		TUMOR FREE	NO	1.88	YES	Complete Remission/Response	NO
TCGA-G4-6293-01A	49	116.77.0	Nationwide Children's Hospital	TCGA-G4-6293-F21799	38cdb95b-9cce-43d4-b3db-3b0ebc66f744	TCGA-G4-6293	NO			YES		22	19	0	2CF39EE2-30E9-4962-9CD1-9F1565E60750	Scheduled Follow-up Submission		NO	No	YES	NO			YES		26	NO	YES	12	1	NO		1		1		No	M0	N1	T3	6293	NO	TUMOR FREE	YES		YES		NO
TCGA-AA-A024-01A	81	33.79.0	Nationwide Children's Hospital	TCGA-AA-A024-F37288	A68DA852-7F42-4C35-8871-76D24DEC29D0	TCGA-AA-A024	NO					22	1	0	50DCC7B3-0B72-467A-A55E-AC1F5498D769	Scheduled Follow-up Submission	Complete Remission/Response	NO	No	YES	NO			NO	NO	14			12	12			0		0		Yes	M0	N0	T3	A024		TUMOR FREE	NO	3.77	YES	Complete Remission/Response	NO
TCGA-D5-5539-01A	60	89.77.0	Nationwide Children's Hospital	TCGA-D5-5539-F20729	747a6f16-843f-475d-a1af-3bba604fc855	TCGA-D5-5539	NO					22	19	0	C72B238A-5A2B-4600-949E-6A0EF92F262A	Scheduled Follow-up Submission			No	YES	NO					4	YES		12	1	NO				1	0	No	M0	N1	T3	5539		WITH TUMOR	YES	5.1	YES		NO
TCGA-AD-6890-01A	65	157.71.0	Nationwide Children's Hospital	TCGA-AD-6890-F48782	38F632B0-5D0F-497A-AED9-BCA2171B5FC0	TCGA-AD-6890	NO		10	YES		22	20	0	DD8EC547-3482-41F6-AFBF-413A36CB6F1D	Scheduled Follow-up Submission	Complete Remission/Response		No	YES	NO			NO	NO	22	NO		12	9	NO		2		0		No	MX	N0	T1	6890		TUMOR FREE	NO	0.8	YES	Complete Remission/Response	NO
TCGA-A6-A5ZU-01A	59	300.56.0	Nationwide Children's Hospital	TCGA-A6-A5ZU-F51209	6ECF4958-2F65-442A-B152-5460B63406E3	TCGA-A6-A5ZU	NO			NO		22	13	0	C0499703-E6D9-41A9-A13E-EA8006AE0800	Scheduled Follow-up Submission	Complete Remission/Response	NO	No	YES	NO			YES	NO	60	YES	NO	12	11	YES		0		1		No	M0	N1	T3	A5ZU		TUMOR FREE	YES	1.6	YES	Complete Remission/Response	NO
TCGA-A6-2678-01A	43	28.86.0	Nationwide Children's Hospital	TCGA-A6-2678-F2526	fd97dc90-ee0e-42dd-82ef-992ccbbc0559	TCGA-A6-2678	NO			NO		22	25	0	AE4C4846-93FA-436E-B9EC-AD7D5F3CF534			NO	No	YES	NO			YES		26	YES	NO	12	10	NO	0	1	4	2		No	M0	N1	T3	2678		TUMOR FREE	YES	13.5	YES		NO
TCGA-A6-2678-11A	43	28.86.0	Nationwide Children's Hospital	TCGA-A6-2678-F2526	fd97dc90-ee0e-42dd-82ef-992ccbbc0559	TCGA-A6-2678	NO			NO		22	25	0	AE4C4846-93FA-436E-B9EC-AD7D5F3CF534			NO	No	YES	NO			YES		26	YES	NO	12	10	NO	0	1	4	2		No	M0	N1	T3	2678		TUMOR FREE	YES	13.5	YES		NO
TCGA-AA-3710-01A	80	41.78.0	Nationwide Children's Hospital	TCGA-AA-3710-F38099	7BB6223F-E63D-4581-B21F-B7561591D123	TCGA-AA-3710	NO					22	10	0	0764110A-BBF6-442E-92CD-EC589EA8098D	Scheduled Follow-up Submission	Complete Remission/Response	YES	No	YES	NO			NO	NO	20	YES		12	12			0		0		No	M0	N0	T3	3710		TUMOR FREE	NO	5.12	YES	Complete Remission/Response	NO
TCGA-AY-6196-01A	47	116.77.0	Nationwide Children's Hospital	TCGA-AY-6196-F21742	67f6053c-81fe-4190-a695-1dd09993577f	TCGA-AY-6196	NO			NO		22	20	0	FC468624-8A8F-432C-AFA2-BCEFA42036D5			NO	No	YES	NO			YES		14	YES	NO	12	2	YES		1		12		No		N2b	T3	6196	NO	TUMOR FREE		5.5	YES
TCGA-AA-3697-01A	77	116.77.0	Nationwide Children's Hospital	TCGA-AA-3697-F38098	07FD1649-F843-448D-82A0-03DCF86A777A	TCGA-AA-3697	NO					22	10	0	A58ABA48-3D3E-4818-B2ED-98267F83DDE1	Scheduled Follow-up Submission		NO	No	YES	NO			NO	NO	50			12	12			0		0		No	M0	N0	T3	3697			NO	4.6	YES		NO
TCGA-AA-3697-11A	77	116.77.0	Nationwide Children's Hospital	TCGA-AA-3697-F38098	07FD1649-F843-448D-82A0-03DCF86A777A	TCGA-AA-3697	NO					22	10	0	A58ABA48-3D3E-4818-B2ED-98267F83DDE1	Scheduled Follow-up Submission		NO	No	YES	NO			NO	NO	50			12	12			0		0		No	M0	N0	T3	3697			NO	4.6	YES		NO
TCGA-CM-6172-01A	70	89.77.0	Nationwide Children's Hospital	TCGA-CM-6172-F14264	d180aa0c-ec3a-446b-b981-6811e90280db	TCGA-CM-6172	NO			NO		22	26	0	B957206E-368A-4B4F-AD71-503A1D9C25CC	Scheduled Follow-up Submission		NO	No	YES	NO			NO		17	NO		12	7	NO		0		1		No	M0	N1a	T3	6172	NO	TUMOR FREE	YES	2.8	YES		NO
TCGA-T9-A92H-01A	82	385.43.0	Nationwide Children's Hospital	TCGA-T9-A92H-F69239	384957FB-FAFF-40F5-A5F7-817FAC4DD9C1	TCGA-T9-A92H	NO		53	NO		22	30	0	CEF65DE4-6AA9-4CF4-8736-6DFE84F7CB70	Scheduled Follow-up Submission	Progressive Disease	NO	No	YES	NO			NO	NO	13	NO	NO	12	12	NO						No	M0	N0	T3	A92H	YES	WITH TUMOR	NO		YES	Complete Remission/Response	NO
TCGA-AD-6965-01A	62	157.71.0	Nationwide Children's Hospital	TCGA-AD-6965-F47143	35430D11-7EE9-42EB-AC57-5148A88E8D95	TCGA-AD-6965	NO					22	22	0	30086B20-FF71-4B7C-B5E6-53CDF213AE1A	Scheduled Follow-up Submission	Progressive Disease		No	YES	NO			NO	NO	17	YES		12	8	NO		1		11		No	M0	N2b	T4a	6965		WITH TUMOR	YES		YES	Complete Remission/Response	NO
TCGA-A6-5660-01A	73	89.77.0	Nationwide Children's Hospital	TCGA-A6-5660-F12414	38affb8d-f8ed-4aa8-a42c-edd6bdc795e3	TCGA-A6-5660	NO			YES		22	1	0	9AF609E8-893C-4739-9A93-CA888614B7BC			NO	No	YES	NO			NO		23	YES		12	6	YES		0		11		No	M0	N2b	T3	5660		TUMOR FREE	YES	0.8	YES		NO
TCGA-A6-5660-11A	73	89.77.0	Nationwide Children's Hospital	TCGA-A6-5660-F12414	38affb8d-f8ed-4aa8-a42c-edd6bdc795e3	TCGA-A6-5660	NO			YES		22	1	0	9AF609E8-893C-4739-9A93-CA888614B7BC			NO	No	YES	NO			NO		23	YES		12	6	YES		0		11		No	M0	N2b	T3	5660		TUMOR FREE	YES	0.8	YES		NO
TCGA-AA-3531-01A	75	28.86.0	Nationwide Children's Hospital	TCGA-AA-3531-F37315	4B7183C5-7857-4D7A-A996-1495DF05F4CA	TCGA-AA-3531	NO					22	1	0	B8E21336-51B5-4930-8455-009AAC93A733	Scheduled Follow-up Submission	Complete Remission/Response	NO	No	YES	NO			NO	NO	37	NO		12	12			0		0		Yes	M0	N0	T3	3531		TUMOR FREE	NO	0.65	YES	Complete Remission/Response	NO
TCGA-AA-3531-11A	75	28.86.0	Nationwide Children's Hospital	TCGA-AA-3531-F37315	4B7183C5-7857-4D7A-A996-1495DF05F4CA	TCGA-AA-3531	NO					22	1	0	B8E21336-51B5-4930-8455-009AAC93A733	Scheduled Follow-up Submission	Complete Remission/Response	NO	No	YES	NO			NO	NO	37	NO		12	12			0		0		Yes	M0	N0	T3	3531		TUMOR FREE	NO	0.65	YES	Complete Remission/Response	NO
TCGA-NH-A5IV-01A	90	385.43.0	Nationwide Children's Hospital	TCGA-NH-A5IV-F55782	91BB200A-6B03-42E1-B4F9-32CA6B6008A7	TCGA-NH-A5IV	NO		30	NO		22	15	0	10ECBB7E-09C7-436F-AD49-3358D9EF262D	Scheduled Follow-up Submission		YES	No	YES	NO				NO	12	NO		12	1	NO		0		0	0	No	MX	N0	T3	A5IV	NO		NO	11.8	YES	Complete Remission/Response	NO
TCGA-G4-6299-01A	69	123.74.0	Nationwide Children's Hospital	TCGA-G4-6299-F22028	cb9fbe96-b7d6-4ab4-8c09-98fa666fc952	TCGA-G4-6299	NO			NO		22	20	0	F66AFAA7-BAE7-4B59-BC06-09DC07764ACE	Scheduled Follow-up Submission		NO	No	YES	NO			NO		17	YES		12	1	NO		0		8		No	M0	N2	T3	6299	NO	TUMOR FREE	YES		YES		NO
TCGA-AA-3562-01A	82	28.86.0	Nationwide Children's Hospital	TCGA-AA-3562-F37516	514803E9-5964-4C55-B49A-83AF0D222A67	TCGA-AA-3562	NO					22	3	0	EAD997FD-E458-4C2B-A204-925DA138BF32	Scheduled Follow-up Submission		YES	No	YES	NO			NO	NO	28	YES		12	12			0		7		Yes	M0	N2	T3	3562			YES		YES		NO
TCGA-D5-6926-01A	65	157.71.0	Nationwide Children's Hospital	TCGA-D5-6926-F29708	ea66d5f0-67f6-4508-a51f-6c3bf90e1f40	TCGA-D5-6926	NO			NO		22	26	0	13EC59BC-986A-479E-8EDF-DB137E528D91	Scheduled Follow-up Submission		NO	No	YES	NO			NO		34	NO	NO	12	3	NO		0		3		No	M0	N1	T4a	6926	NO	TUMOR FREE	YES	2.2	YES		YES
TCGA-CM-4751-01A	62	138.78.0	Nationwide Children's Hospital	TCGA-CM-4751-F14661	1fae9028-35a5-42dc-878d-02b34e17e449	TCGA-CM-4751	NO			NO		22	8	0	7D3C8C42-78C5-4B61-B817-12A12BB9C52F	Scheduled Follow-up Submission		NO	No	YES	NO			NO		48	YES		12	8	NO		0		3		No	M0	N1b	T3	4751	YES	TUMOR FREE	YES	4.2	YES		NO
TCGA-A6-6141-01A	31	123.74.0	Nationwide Children's Hospital	TCGA-A6-6141-F21471	f0900dfb-dfa3-4d5a-8233-cc0427052f6b	TCGA-A6-6141	NO					22	13	0	D076A339-B729-498B-A285-A695D09A852D			YES	No	YES	NO			YES		19	NO	NO	12	2	NO	0	0	5	0		No	M0	N0	T3	6141		TUMOR FREE	YES	5	YES		NO
TCGA-NH-A50V-01A	69	300.56.0	Nationwide Children's Hospital	TCGA-NH-A50V-F50653	56B89B24-F861-46C9-9FAD-68D0AC29AB4A	TCGA-NH-A50V	NO		0.45	NO		22	28	0	70081354-83D9-433D-9036-5C2867D80B8F	Scheduled Follow-up Submission	Complete Remission/Response		No	YES	NO			NO	NO	35	NO	NO	12	10	NO		0		4	0	No	M0	N2a	T3	A50V	NO	TUMOR FREE	YES		YES	Complete Remission/Response	NO
TCGA-NH-A50V-01B	69	300.56.0	Nationwide Children's Hospital	TCGA-NH-A50V-F50653	56B89B24-F861-46C9-9FAD-68D0AC29AB4A	TCGA-NH-A50V	NO		0.45	NO		22	28	0	70081354-83D9-433D-9036-5C2867D80B8F	Scheduled Follow-up Submission	Complete Remission/Response		No	YES	NO			NO	NO	35	NO	NO	12	10	NO		0		4	0	No	M0	N2a	T3	A50V	NO	TUMOR FREE	YES		YES	Complete Remission/Response	NO
TCGA-AA-3980-01A	89	41.78.0	Nationwide Children's Hospital	TCGA-AA-3980-F37938	8E8D6FD6-0697-4F04-AB07-F2887AFE211E	TCGA-AA-3980	NO					22	6	0	35986A00-1A7E-4408-88E0-966B4F7BB555	Scheduled Follow-up Submission	Complete Remission/Response	YES	No	YES	NO			NO	NO	19	YES		12	12			1		0		No	M0	N0	T2	3980		TUMOR FREE	NO		YES	Complete Remission/Response	NO
TCGA-AA-3869-01A	76	41.78.0	Nationwide Children's Hospital	TCGA-AA-3869-F37989	A9036708-7CA4-4F63-B1B6-3A7C82C9FBC7	TCGA-AA-3869	NO					22	8	0	A51217C3-9743-4F1E-96E1-BE456776625D	Scheduled Follow-up Submission	Partial Remission/Response	NO	No	YES	NO			NO	NO	28	YES		12	12			0		14		No	M1	N2	T4	3869		WITH TUMOR	YES		YES	Partial Remission/Response	NO
TCGA-AA-3967-01A	77	45.80.0	Nationwide Children's Hospital	TCGA-AA-3967-F37952	641DCD68-3906-4437-9AD3-B08A5E91B4C3	TCGA-AA-3967	NO					22	6	0	2B7B1853-D23E-42B5-80EA-69DAC5D34B5B	Scheduled Follow-up Submission	Complete Remission/Response	YES	No	YES	NO			NO	NO	33	NO		12	12			0		2		No	M0	N1	T3	3967		TUMOR FREE	YES	2.27	YES	Complete Remission/Response	NO
TCGA-AA-3848-01A	82	36.83.0	Nationwide Children's Hospital	TCGA-AA-3848-F38005	A9B405F7-95EE-42F4-91EE-4B56E948F007	TCGA-AA-3848	NO					22	8	0	FB3D1892-6209-49D7-A9C9-936E558D641A	Scheduled Follow-up Submission		YES	No	YES	NO			NO	NO	12	YES		12	12			0		6		No	M0	N2	T3	3848			NO		YES		NO
TCGA-NH-A6GC-01A	66	422.38.0	Nationwide Children's Hospital	TCGA-NH-A6GC-F60510	D2E1662D-2E0B-454F-A8F4-1B051D6DB387	TCGA-NH-A6GC	NO		1	NO		22	10	0	4E6B8DD9-2970-4D2C-8844-22773C7732E2	Scheduled Follow-up Submission			No	YES	YES	12	YES		NO	19	NO	NO	12	6	NO		0		3		No	M1b	N1b	T4b	A6GC	NO		YES		YES		NO
TCGA-NH-A6GC-06A	66	422.38.0	Nationwide Children's Hospital	TCGA-NH-A6GC-F60510	D2E1662D-2E0B-454F-A8F4-1B051D6DB387	TCGA-NH-A6GC	NO		1	NO		22	10	0	4E6B8DD9-2970-4D2C-8844-22773C7732E2	Scheduled Follow-up Submission			No	YES	YES	12	YES		NO	19	NO	NO	12	6	NO		0		3		No	M1b	N1b	T4b	A6GC	NO		YES		YES		NO
TCGA-AA-3660-01A	51	116.77.0	Nationwide Children's Hospital	TCGA-AA-3660-F37518	C344AAB6-3523-4FF6-8FC8-93DDCB53C432	TCGA-AA-3660	NO					22	3	0	35F0DBC6-5E9D-4CD8-B251-51E77DC6EEDC	Scheduled Follow-up Submission	Complete Remission/Response	NO	No	YES	NO			NO	NO	33	NO		12	12			0		0		No	M0	N0	T3	3660		TUMOR FREE	NO	1.37	YES	Complete Remission/Response	NO
TCGA-AA-3660-11A	51	116.77.0	Nationwide Children's Hospital	TCGA-AA-3660-F37518	C344AAB6-3523-4FF6-8FC8-93DDCB53C432	TCGA-AA-3660	NO					22	3	0	35F0DBC6-5E9D-4CD8-B251-51E77DC6EEDC	Scheduled Follow-up Submission	Complete Remission/Response	NO	No	YES	NO			NO	NO	33	NO		12	12			0		0		No	M0	N0	T3	3660		TUMOR FREE	NO	1.37	YES	Complete Remission/Response	NO
TCGA-DM-A288-01A	68	154.69.0	Nationwide Children's Hospital	TCGA-DM-A288-F19047	921EBAEF-985F-4EB0-9D2D-BA0DCA9B274E	TCGA-DM-A288	NO					22	2	0	D80C2025-6608-49A4-8097-6070F6C38FC0	Scheduled Follow-up Submission		NO	No	YES	YES	13	YES			22	NO	NO	12	12		0	0	6	4		No	M0	N2	T3	A288					YES
TCGA-G4-6322-01A	65	116.77.0	Nationwide Children's Hospital	TCGA-G4-6322-F21960	b8500ee6-e106-4046-8c89-9ca1cab89d29	TCGA-G4-6322	NO			YES		22	21	0	E45F7D6A-C996-43AB-8878-9A852524135F	Scheduled Follow-up Submission		NO	No	YES	NO			NO		26	YES		12	2	NO		0		2		No	MX	N1	T3	6322	NO	WITH TUMOR	YES	4.2	YES		NO
TCGA-G4-6322-11A	65	116.77.0	Nationwide Children's Hospital	TCGA-G4-6322-F21960	b8500ee6-e106-4046-8c89-9ca1cab89d29	TCGA-G4-6322	NO			YES		22	21	0	E45F7D6A-C996-43AB-8878-9A852524135F	Scheduled Follow-up Submission		NO	No	YES	NO			NO		26	YES		12	2	NO		0		2		No	MX	N1	T3	6322	NO	WITH TUMOR	YES	4.2	YES		NO
TCGA-AD-6888-01A	73	157.71.0	Nationwide Children's Hospital	TCGA-AD-6888-F37065	B32EF3E1-DAA3-4FEA-A05A-FDC5809D1030	TCGA-AD-6888	NO		90	YES		22	26	0	6F1D1E09-2B76-4D1C-A676-2C02B03DE871	Scheduled Follow-up Submission	Progressive Disease	YES	No	YES	NO			NO	NO	18	YES		12	8	NO		0		2	0	Yes	M0	N1b	T3	6888	NO	WITH TUMOR	NO		YES	Complete Remission/Response	NO
TCGA-AA-3520-01A	86	28.86.0	Nationwide Children's Hospital	TCGA-AA-3520-F37299	EB555C35-2840-4E84-A86F-BB59443F3866	TCGA-AA-3520	NO					22	1	0	D6E03167-BFE3-4774-BB11-618356BA4422	Scheduled Follow-up Submission		YES	No	YES	NO			NO	NO	20	NO		12	12			0		0		Yes	M0	N0	T3	3520			NO	5.8	YES		NO
TCGA-AA-3520-11A	86	28.86.0	Nationwide Children's Hospital	TCGA-AA-3520-F37299	EB555C35-2840-4E84-A86F-BB59443F3866	TCGA-AA-3520	NO					22	1	0	D6E03167-BFE3-4774-BB11-618356BA4422	Scheduled Follow-up Submission		YES	No	YES	NO			NO	NO	20	NO		12	12			0		0		Yes	M0	N0	T3	3520			NO	5.8	YES		NO
TCGA-A6-5659-01A	82	89.77.0	Nationwide Children's Hospital	TCGA-A6-5659-F12312	bf113369-ec1e-411d-bc5c-ade4f54e1811	TCGA-A6-5659	NO			YES		22	26	0	DE620312-A5AE-468A-86FC-5EED29B91011			NO	No	YES	NO					26	NO		12	5	NO		0		0		No	M0	N0	T2	5659		TUMOR FREE	NO	2.9	YES		NO
TCGA-A6-5659-01B	82	89.77.0	Nationwide Children's Hospital	TCGA-A6-5659-F12312	bf113369-ec1e-411d-bc5c-ade4f54e1811	TCGA-A6-5659	NO			YES		22	26	0	DE620312-A5AE-468A-86FC-5EED29B91011			NO	No	YES	NO					26	NO		12	5	NO		0		0		No	M0	N0	T2	5659		TUMOR FREE	NO	2.9	YES		NO
TCGA-A6-5659-11A	82	89.77.0	Nationwide Children's Hospital	TCGA-A6-5659-F12312	bf113369-ec1e-411d-bc5c-ade4f54e1811	TCGA-A6-5659	NO			YES		22	26	0	DE620312-A5AE-468A-86FC-5EED29B91011			NO	No	YES	NO					26	NO		12	5	NO		0		0		No	M0	N0	T2	5659		TUMOR FREE	NO	2.9	YES		NO
TCGA-A6-2676-01A	75	29.82.0	Nationwide Children's Hospital	TCGA-A6-2676-F2537	490b19ab-0230-4b0a-9e1d-86b78e119c9d	TCGA-A6-2676	NO			NO		22	25	0	29296AB1-CF62-4378-B342-D3668A0C530B			NO	No	YES	NO					15	NO		12	10	NO		0		0		No	M0	N0	T4	2676		TUMOR FREE	YES	6.3	YES		NO
TCGA-A6-2676-11A	75	29.82.0	Nationwide Children's Hospital	TCGA-A6-2676-F2537	490b19ab-0230-4b0a-9e1d-86b78e119c9d	TCGA-A6-2676	NO			NO		22	25	0	29296AB1-CF62-4378-B342-D3668A0C530B			NO	No	YES	NO					15	NO		12	10	NO		0		0		No	M0	N0	T4	2676		TUMOR FREE	YES	6.3	YES		NO
TCGA-AA-3815-01A	65	41.78.0	Nationwide Children's Hospital	TCGA-AA-3815-F38109	04BF5C9A-0596-4403-9951-FAD10EEBDE8D	TCGA-AA-3815	NO					22	10	0	2D910627-C583-478D-B321-424784C5B137	Scheduled Follow-up Submission	Complete Remission/Response	NO	No	YES	NO			NO	NO	20	YES		12	12			1		0		No	M0	N0	T3	3815		TUMOR FREE	NO	0.82	YES	Complete Remission/Response	NO
TCGA-AA-A02W-01A	73	33.79.0	Nationwide Children's Hospital	TCGA-AA-A02W-F37279	5E1742B6-6CBD-4623-BA87-384CD18456D0	TCGA-AA-A02W	NO					22	1	0	7A15EFEB-CED3-47D8-9134-57A8B4FF7C64	Scheduled Follow-up Submission	Complete Remission/Response	YES	No	YES	NO			NO	NO	12			12	12			0		0		No	M0	N0	T2	A02W		TUMOR FREE	NO	2.96	YES	Complete Remission/Response	NO
TCGA-A6-2680-01A	72	76.78.0	Nationwide Children's Hospital	TCGA-A6-2680-F6361	6dfe3224-f6e0-4833-bc4f-fe533978e474	TCGA-A6-2680	NO			NO		22	19	0	A4D4C2D2-D205-4D06-AFEE-66DE3D7DDDE1				No	YES	NO					34	NO		12	1	NO		0		0		No	M0	N0	T3	2680		TUMOR FREE	NO	3.2	YES		NO
TCGA-A6-2680-11A	72	76.78.0	Nationwide Children's Hospital	TCGA-A6-2680-F6361	6dfe3224-f6e0-4833-bc4f-fe533978e474	TCGA-A6-2680	NO			NO		22	19	0	A4D4C2D2-D205-4D06-AFEE-66DE3D7DDDE1				No	YES	NO					34	NO		12	1	NO		0		0		No	M0	N0	T3	2680		TUMOR FREE	NO	3.2	YES		NO
TCGA-AA-3692-01A	47	36.83.0	Nationwide Children's Hospital	TCGA-AA-3692-F38095	E980278C-4FF6-4B4B-B66D-CFABB2F7970E	TCGA-AA-3692	NO					22	10	0	FBCFA125-E0E5-48B2-B2D3-3F4BAEC662CE	Scheduled Follow-up Submission	Progressive Disease	YES	No	YES	NO			NO	NO	30	NO		12	12			0		5		Yes	M1	N2	T3	3692		WITH TUMOR	YES	49.21	YES	Progressive Disease	YES
TCGA-D5-6931-01A	77	157.71.0	Nationwide Children's Hospital	TCGA-D5-6931-F29860	f6243a61-da18-4069-b6ea-1352e162e728	TCGA-D5-6931	NO			NO		22	30	0	12E5EB61-45E0-4262-A374-839D6D1C76C4	Scheduled Follow-up Submission		NO	No	YES	NO			NO		14	YES		12	3	NO				4		No	M0	N2	T4b	6931	YES	TUMOR FREE	NO	6.9	YES		NO
TCGA-AA-3552-01A	85	28.86.0	Nationwide Children's Hospital	TCGA-AA-3552-F37508	877C5351-9662-4840-846C-66D848A52F4C	TCGA-AA-3552	NO					22	3	0	DE56D974-06EF-4AAD-8A6D-CB19E7A52D92	Scheduled Follow-up Submission	Complete Remission/Response	NO	No	YES	NO			NO	NO	20	YES		12	12			0		10		Yes	M0	N2	T3	3552		TUMOR FREE	NO	2.71	YES	Complete Remission/Response	NO
TCGA-A6-6650-01A	69	123.74.0	Nationwide Children's Hospital	TCGA-A6-6650-F18520	c0becc9e-7b2a-4c8a-905c-7cf38bf7dcac	TCGA-A6-6650	NO			NO		22	18	0	76BFD3E3-0A99-46D0-B96D-F43CA647450C			NO	No	YES	NO					19	NO		12	11	NO		0		0		No	M0	N0	T3	6650		TUMOR FREE	NO	2.9	YES		NO
TCGA-A6-6650-01B	69	123.74.0	Nationwide Children's Hospital	TCGA-A6-6650-F18520	c0becc9e-7b2a-4c8a-905c-7cf38bf7dcac	TCGA-A6-6650	NO			NO		22	18	0	76BFD3E3-0A99-46D0-B96D-F43CA647450C			NO	No	YES	NO					19	NO		12	11	NO		0		0		No	M0	N0	T3	6650		TUMOR FREE	NO	2.9	YES		NO
TCGA-D5-6539-01A	45	116.77.0	Nationwide Children's Hospital	TCGA-D5-6539-F28922	0d71e69a-dd69-4022-92fa-542c7818f224	TCGA-D5-6539	NO					22	2	0	389167CC-B976-4B4B-9C03-8FD621D6AB69	Scheduled Follow-up Submission			No	YES	NO					12	NO		12	3	NO				0		No	M0	N0	T3	6539	YES	TUMOR FREE	NO	1.1	YES		NO
TCGA-AA-3679-01A	59	36.83.0	Nationwide Children's Hospital	TCGA-AA-3679-F38086	59725454-43AB-4DD9-8AFA-20448C8C34B1	TCGA-AA-3679	NO					22	10	0	CEACC0DD-DC50-4FBD-9454-2EAF3E603E47	Scheduled Follow-up Submission	Progressive Disease	NO	No	YES	NO			NO	NO	12	YES		12	12			0		5		No	M1	N2	T3	3679		WITH TUMOR	YES	25.78	YES	Progressive Disease	NO
TCGA-G4-6306-01A	71	123.74.0	Nationwide Children's Hospital	TCGA-G4-6306-F21445	c46277c9-79be-4a2a-9a00-542f8f9ccc9e	TCGA-G4-6306	NO		15	NO		22	23	0	37C888D6-84DB-4CAE-82E1-DA800AC47A8E	Scheduled Follow-up Submission		YES	No	YES	NO			NO		17			12	1	NO		1		0		No	M0	N0	T2	6306	NO	TUMOR FREE	NO	2.7	YES		NO
TCGA-AA-3673-01A	53	36.83.0	Nationwide Children's Hospital	TCGA-AA-3673-F37524	B4F44533-0295-4464-A514-C8DDBCC17BFA	TCGA-AA-3673	NO					22	3	0	ABC3A5F9-FF32-4BE0-959E-99FDF4C26207	Scheduled Follow-up Submission	Complete Remission/Response	NO	No	YES	NO			NO	NO	41	NO		12	12			1		0		No	M0	N0	T3	3673		TUMOR FREE	NO	3.89	NO	Complete Remission/Response	NO
TCGA-CM-5863-01A	60	138.78.0	Nationwide Children's Hospital	TCGA-CM-5863-F14267	a8d0bbc6-dfa2-4f5d-befe-d6395ed24794	TCGA-CM-5863	NO			NO		22	26	0	A321F822-D4F9-40F2-96C5-BEB1D7030BEE	Scheduled Follow-up Submission		NO	No	YES	NO			NO		12	NO		12	7	YES		0		3		No	M0	N1b	T3	5863	YES	TUMOR FREE	YES	4.7	YES		NO
TCGA-AA-3663-01A	42	116.77.0	Nationwide Children's Hospital	TCGA-AA-3663-F37520	F1363562-F9D2-4A2A-90C1-F05E28DC1D47	TCGA-AA-3663	NO					22	3	0	398F79EE-801F-4FCA-B2FB-0427904C27EB	Scheduled Follow-up Submission	Complete Remission/Response	NO	No	YES	NO			NO	NO	40	NO		12	12			0		0		No	M0	N0	T3	3663		TUMOR FREE	NO	18.77	YES	Complete Remission/Response	NO
TCGA-AA-3663-11A	42	116.77.0	Nationwide Children's Hospital	TCGA-AA-3663-F37520	F1363562-F9D2-4A2A-90C1-F05E28DC1D47	TCGA-AA-3663	NO					22	3	0	398F79EE-801F-4FCA-B2FB-0427904C27EB	Scheduled Follow-up Submission	Complete Remission/Response	NO	No	YES	NO			NO	NO	40	NO		12	12			0		0		No	M0	N0	T3	3663		TUMOR FREE	NO	18.77	YES	Complete Remission/Response	NO
TCGA-AA-3986-01A	73	41.78.0	Nationwide Children's Hospital	TCGA-AA-3986-F37937	BCAAE367-C52E-4D07-8FB1-39952154FEA8	TCGA-AA-3986	NO					22	6	0	CF2A45B6-676A-4A92-A1DC-60E0786CC732	Scheduled Follow-up Submission	Complete Remission/Response	YES	No	YES	NO			NO	NO	27	NO		12	12			0		0		Yes	M0	N0	T2	3986		TUMOR FREE	NO	1.89	YES	Complete Remission/Response	NO
TCGA-G4-6323-01A	50	116.77.0	Nationwide Children's Hospital	TCGA-G4-6323-F21889	d0240b51-d0a9-464c-896a-930684fdd57a	TCGA-G4-6323	NO			NO		22	30	0	CD4EA537-FC24-47B6-A41E-962E4A964CAB	Scheduled Follow-up Submission		NO	No	YES	NO			NO		24	NO		12	1	NO		0		0		No	MX	N0	Tis	6323	NO	TUMOR FREE	NO	0.9	YES		NO
TCGA-F4-6703-01A	64	138.78.0	Nationwide Children's Hospital	TCGA-F4-6703-F39565	EBBC160F-A681-4D52-BA68-8A6D834C66E8	TCGA-F4-6703				NO		22	25	0	9F4FFC11-C2E9-4CA2-8B07-97ADBFEC3B5E	Scheduled Follow-up Submission	Complete Remission/Response	NO	No	YES					NO	12	NO		12	1	NO		0		0		No	M0	N0	T3	6703	NO	TUMOR FREE	NO		YES	Complete Remission/Response	NO
TCGA-AA-3695-01A	63	36.83.0	Nationwide Children's Hospital			TCGA-AA-3695	NO					22		0	9D8EC94B-97C1-4CE3-904F-8C68B5EEF3D3			YES	No	YES	NO			NO		33	YES		12				0		6		No	M1	N2	T3	3695					YES
TCGA-AA-3527-01A	90	28.86.0	Nationwide Children's Hospital			TCGA-AA-3527	NO					22		0	FE7C7DF7-F28F-4751-B509-9CD23EBDFDF5			YES	No	YES	NO			NO		15	NO		12				0		0		Yes	M0	N0	T3	3527				4.72	YES
TCGA-AA-3527-11A	90	28.86.0	Nationwide Children's Hospital			TCGA-AA-3527	NO					22		0	FE7C7DF7-F28F-4751-B509-9CD23EBDFDF5			YES	No	YES	NO			NO		15	NO		12				0		0		Yes	M0	N0	T3	3527				4.72	YES
TCGA-AA-3976-01A	70	41.78.0	Nationwide Children's Hospital	TCGA-AA-3976-F37943	EF8165F7-3507-4141-9E35-BD662066009A	TCGA-AA-3976	NO					22	6	0	797C5F25-499E-4302-9C08-E97B46E5E589	Scheduled Follow-up Submission	Complete Remission/Response	NO	No	YES	NO			NO	NO	16			12	12			0		2		Yes	M0	N1	T2	3976			YES		YES	Complete Remission/Response	NO
TCGA-G4-6302-01A	90	116.77.0	Nationwide Children's Hospital	TCGA-G4-6302-F21446	14156fbf-46da-4770-b3c6-6409bba1da9e	TCGA-G4-6302	NO		1	YES		22	20	0	58D10F92-7B3D-4603-A4FC-B63318B40B2D	Scheduled Follow-up Submission		NO	No	YES	NO			NO		15	YES		12	1	NO		0		0		No	M0	N0	T3	6302	YES	TUMOR FREE	NO		YES		NO
TCGA-G4-6302-11A	90	116.77.0	Nationwide Children's Hospital	TCGA-G4-6302-F21446	14156fbf-46da-4770-b3c6-6409bba1da9e	TCGA-G4-6302	NO		1	YES		22	20	0	58D10F92-7B3D-4603-A4FC-B63318B40B2D	Scheduled Follow-up Submission		NO	No	YES	NO			NO		15	YES		12	1	NO		0		0		No	M0	N0	T3	6302	YES	TUMOR FREE	NO		YES		NO
TCGA-AY-6386-01A	66	116.77.0	Nationwide Children's Hospital	TCGA-AY-6386-F21744	e09f8b62-6bec-42ff-9f44-7c287ab2d81a	TCGA-AY-6386	NO			YES		22	20	0	AFFB1E65-7942-4F12-A854-C9D11D4DFD7B			NO	No	YES	NO			NO		19	NO	NO	12	2	NO		0		1		No	M0	N1a	T3	6386	NO	TUMOR FREE	YES	1.3	YES		NO
TCGA-QG-A5Z1-01A	71	300.56.0	Nationwide Children's Hospital	TCGA-QG-A5Z1-F57368	33F88B72-AAB9-4040-8E56-81025767EE53	TCGA-QG-A5Z1	NO		5	NO		22	18	0	4B036983-FA40-40ED-B5BD-996FFD198712	Scheduled Follow-up Submission		NO	No	YES	NO			NO	NO	38	YES		12	4			0		3		No	MX	N1b	T3	A5Z1	YES		NO	5.3	YES		NO
TCGA-A6-2670-01A	45	28.80.0	Nationwide Children's Hospital	TCGA-A6-2670-F4954	A927ECD1-B95E-41F6-8CB3-DCD75560C009	TCGA-A6-2670	NO			NO	2011-04-19-04:00	17	19	0	9b816ff5-bac9-4f59-9d85-02b3ce44de03			YES	No	YES	NO			NO		22	NO		12	10	NO		0				No	M0	N0	T3	2670			NO		YES		NO	Subject withdrew consent
TCGA-G4-6628-01A	78	138.78.0	Nationwide Children's Hospital	TCGA-G4-6628-F21870	423dcf39-cb1b-4698-87a8-1a3d818145cf	TCGA-G4-6628	NO			YES		22	7	0	59491CD2-5BD1-436E-96FF-4888990B47EF	Scheduled Follow-up Submission		NO	No	YES	NO			NO		16	NO		12	2	NO		0		0		Yes	M0	N0	T2	6628	NO	TUMOR FREE	NO	2.1	YES		NO
TCGA-AA-3529-01A	78	28.86.0	Nationwide Children's Hospital			TCGA-AA-3529	NO					22		0	E6CD0A17-21BC-483F-9C8F-422E2D15FE01			NO	No	YES	NO			NO		34	YES		12				0		10		No	M0	N2	T3	3529				17.3	YES
TCGA-AA-3529-11A	78	28.86.0	Nationwide Children's Hospital			TCGA-AA-3529	NO					22		0	E6CD0A17-21BC-483F-9C8F-422E2D15FE01			NO	No	YES	NO			NO		34	YES		12				0		10		No	M0	N2	T3	3529				17.3	YES
TCGA-AA-3543-01A	84	29.82.0	Nationwide Children's Hospital	TCGA-AA-3543-F37502	626FFFA0-E469-49F8-A680-86BCBF2AA13D	TCGA-AA-3543	NO					22	3	0	8FA3EF42-4A2E-43E8-AE02-147012A5BD9D	Scheduled Follow-up Submission		YES	Yes	YES	NO			NO	NO	25	NO		12	12			0		0		Yes	M0	N0	T2	3543		TUMOR FREE	NO	0.81	YES		NO
TCGA-AA-3492-01A	90	76.78.0	Nationwide Children's Hospital	TCGA-AA-3492-F37295	B2E5C2D6-8729-4BDB-951B-57A6B35C799D	TCGA-AA-3492	NO					22	1	0	B4260556-2FDF-4739-972B-7FCBC9764E4E	Scheduled Follow-up Submission		NO	No	YES	NO			NO	NO	21	NO		12	12			0		0		No	M0	N0	T3	3492		TUMOR FREE	NO		YES		NO
TCGA-AA-3492-11A	90	76.78.0	Nationwide Children's Hospital	TCGA-AA-3492-F37295	B2E5C2D6-8729-4BDB-951B-57A6B35C799D	TCGA-AA-3492	NO					22	1	0	B4260556-2FDF-4739-972B-7FCBC9764E4E	Scheduled Follow-up Submission		NO	No	YES	NO			NO	NO	21	NO		12	12			0		0		No	M0	N0	T3	3492		TUMOR FREE	NO		YES		NO
TCGA-AY-6197-01A	60	116.77.0	Nationwide Children's Hospital	TCGA-AY-6197-F21743	b801b588-c3a7-4427-a746-a639eb95a134	TCGA-AY-6197	NO			NO		22	20	0	E3C53A6A-867F-4B16-B66A-E6B15D72DB80			NO	No	YES	NO			YES		16	NO	YES	12	2	NO	4	0	5	0		No		N0	T3	6197	NO	TUMOR FREE	NO		YES		NO
TCGA-CA-5797-01A	56	89.77.0	Nationwide Children's Hospital	TCGA-CA-5797-F20282	88e5623d-a3a5-45bd-8467-3e0afa361cb6	TCGA-CA-5797						22	9	0	FCB31FE6-A2D6-4F30-A21C-37DF6009C4D7				No	YES									12	1							No	M0	N0	T3	5797		TUMOR FREE	YES		NO		NO
TCGA-AA-3941-01A	84	41.78.0	Nationwide Children's Hospital	TCGA-AA-3941-F37983	6CC1236D-57B5-4C61-AD13-DFDAFBAF19F0	TCGA-AA-3941	NO					22	8	0	4ED5A84B-7EC6-4891-A417-91E4B7F52522	Scheduled Follow-up Submission		NO	No	YES	NO			NO	NO	41	YES		12	12			0		3		No	M1a	N1b	T4	3941			NO		YES		NO
TCGA-CM-4748-01A	53	76.78.0	Nationwide Children's Hospital	TCGA-CM-4748-F5913	002365d7-6ffd-45ae-9564-8c0374075959	TCGA-CM-4748	NO			NO		22	10	0	4ACAEE87-93CE-418B-9FF3-D693A8ED57F7			YES	No	YES	NO			YES		23	YES		12	1	YES		0		1		No	M0	N1a	T4a	4748	NO	TUMOR FREE	YES	2	YES		NO
TCGA-AA-A004-01A	76	33.79.0	Nationwide Children's Hospital	TCGA-AA-A004-F37918	F6D48268-49CF-448F-90C9-9B97ADB1FEF4	TCGA-AA-A004	NO					22	6	0	8C0D3C3B-A491-48DB-823A-2EB58D378468	Scheduled Follow-up Submission	Complete Remission/Response	YES	No	YES	NO			NO	NO	32	NO		12	12			0		0		No	M0	N0	T3	A004		TUMOR FREE	NO		YES	Complete Remission/Response	NO
TCGA-A6-3809-01A	71	41.78.0	Nationwide Children's Hospital	TCGA-A6-3809-F2573	c8e553a4-b76e-48a2-9de6-8e88babbf880	TCGA-A6-3809	NO			YES		22	29	0	98AEE28B-E618-4751-81CC-5F486D3AE369			NO	No	YES	NO			NO		24	NO	YES	12	10	NO	5	1	5	0		No	M0	N0	T4	3809		TUMOR FREE	NO		YES		NO
TCGA-A6-3809-01B	71	41.78.0	Nationwide Children's Hospital	TCGA-A6-3809-F2573	c8e553a4-b76e-48a2-9de6-8e88babbf880	TCGA-A6-3809	NO			YES		22	29	0	98AEE28B-E618-4751-81CC-5F486D3AE369			NO	No	YES	NO			NO		24	NO	YES	12	10	NO	5	1	5	0		No	M0	N0	T4	3809		TUMOR FREE	NO		YES		NO
TCGA-A6-3809-11A	71	41.78.0	Nationwide Children's Hospital	TCGA-A6-3809-F2573	c8e553a4-b76e-48a2-9de6-8e88babbf880	TCGA-A6-3809	NO			YES		22	29	0	98AEE28B-E618-4751-81CC-5F486D3AE369			NO	No	YES	NO			NO		24	NO	YES	12	10	NO	5	1	5	0		No	M0	N0	T4	3809		TUMOR FREE	NO		YES		NO
TCGA-AA-3984-01A	61	41.78.0	Nationwide Children's Hospital			TCGA-AA-3984	NO					22		0	958FEAD7-D6FD-451F-ADC2-D84083AFA7D7			YES	No	YES	NO			NO		12	YES		12				0		0		No	M0	N0	T3	3984					YES
TCGA-A6-2677-01A	68	28.86.0	Nationwide Children's Hospital	TCGA-A6-2677-F2506	52bd140c-7803-4ae0-af1b-98be72f3af5b	TCGA-A6-2677	NO			NO		22	22	0	D7BA6D97-E637-4E0B-A331-FF4DF25BFF21			NO	No	YES	NO					30	YES		12	10	NO		2		5		Yes	M0	N2	T3	2677		TUMOR FREE	YES	27.4	YES		NO
TCGA-A6-2677-01B	68	28.86.0	Nationwide Children's Hospital	TCGA-A6-2677-F2506	52bd140c-7803-4ae0-af1b-98be72f3af5b	TCGA-A6-2677	NO			NO		22	22	0	D7BA6D97-E637-4E0B-A331-FF4DF25BFF21			NO	No	YES	NO					30	YES		12	10	NO		2		5		Yes	M0	N2	T3	2677		TUMOR FREE	YES	27.4	YES		NO
TCGA-A6-2677-11A	68	28.86.0	Nationwide Children's Hospital	TCGA-A6-2677-F2506	52bd140c-7803-4ae0-af1b-98be72f3af5b	TCGA-A6-2677	NO			NO		22	22	0	D7BA6D97-E637-4E0B-A331-FF4DF25BFF21			NO	No	YES	NO					30	YES		12	10	NO		2		5		Yes	M0	N2	T3	2677		TUMOR FREE	YES	27.4	YES		NO
TCGA-AA-3712-01A	65	116.77.0	Nationwide Children's Hospital			TCGA-AA-3712	NO					22		0	14F00673-AFEA-4038-A086-145E0049FA0F			NO	No	YES	NO			NO		18	YES		12				0		12		No	M0	N2	T3	3712				0.88	YES
TCGA-AA-3712-11A	65	116.77.0	Nationwide Children's Hospital			TCGA-AA-3712	NO					22		0	14F00673-AFEA-4038-A086-145E0049FA0F			NO	No	YES	NO			NO		18	YES		12				0		12		No	M0	N2	T3	3712				0.88	YES
TCGA-D5-6924-01A	68	157.71.0	Nationwide Children's Hospital	TCGA-D5-6924-F29901	f5daaff5-f2bc-42ab-9bda-53dcf1a305d0	TCGA-D5-6924	NO			NO		22	30	0	2D666229-F339-43C4-ADF4-6E0EAADDC9B2	Scheduled Follow-up Submission		NO	No	YES	NO			NO		8	NO	NO	12	3	NO		0		0		No	M0	N0	T3	6924	NO	TUMOR FREE	NO	3.1	YES		NO
TCGA-AA-3831-01A	66	36.83.0	Nationwide Children's Hospital	TCGA-AA-3831-F38113	D7BE3EE5-2807-49CC-8466-CD1AEE337AC4	TCGA-AA-3831	NO					22	10	0	90817438-2C89-4827-AAC0-ECBC2B4632B7	Scheduled Follow-up Submission	Complete Remission/Response	NO	No	YES	NO			NO	NO	12	YES		12	12			0		0		No	M0	N0	T3	3831		TUMOR FREE	NO		YES	Complete Remission/Response	NO
TCGA-CM-5349-01A	68	116.77.0	Nationwide Children's Hospital	TCGA-CM-5349-F11076	643ee454-daf7-4df4-86b6-53a9e9417a84	TCGA-CM-5349	NO			NO		22	3	0	5683590F-7BAC-42D1-AE64-F39A8F4088DF			NO	No	YES	NO			YES		21	NO		12	5	NO		0		0		No	M0	N0	T3	5349	NO	TUMOR FREE	NO	3	YES		NO
TCGA-G4-6295-01A	70	116.77.0	Nationwide Children's Hospital	TCGA-G4-6295-F21796	98402fef-6ffb-4a00-93a5-76e4ed148257	TCGA-G4-6295	NO			YES		22	19	0	C4946EAE-5616-4A0C-816F-5E044A00D9D6	Scheduled Follow-up Submission		NO	No	YES	NO			NO		23	NO	NO	12	1	NO		0		0		No	M0	N0	T3	6295	NO	TUMOR FREE	NO		YES		NO
TCGA-G4-6295-11A	70	116.77.0	Nationwide Children's Hospital	TCGA-G4-6295-F21796	98402fef-6ffb-4a00-93a5-76e4ed148257	TCGA-G4-6295	NO			YES		22	19	0	C4946EAE-5616-4A0C-816F-5E044A00D9D6	Scheduled Follow-up Submission		NO	No	YES	NO			NO		23	NO	NO	12	1	NO		0		0		No	M0	N0	T3	6295	NO	TUMOR FREE	NO		YES		NO
TCGA-AA-3544-01A	68	28.86.0	Nationwide Children's Hospital	TCGA-AA-3544-F37505	8575946B-7CD5-4A0B-A749-83C08F057172	TCGA-AA-3544	NO					22	3	0	52DC4744-4E87-476F-9C98-608BB76CA62D	Scheduled Follow-up Submission	Complete Remission/Response	NO	No	YES	NO			NO	NO	21	NO		12	12			0		0		No	M0	N0	T2	3544		TUMOR FREE	NO	0.39	YES	Complete Remission/Response	NO
TCGA-AD-6964-01A	58	157.71.0	Nationwide Children's Hospital	TCGA-AD-6964-F47088	185C7219-945C-44E9-8726-B8E986FB2145	TCGA-AD-6964	YES	Normal	0	NO		22	22	0	3107D1AE-F8A1-41F8-B600-A28DE0191ED3	Scheduled Follow-up Submission	Progressive Disease	NO	No	YES	NO			YES	NO	16	YES	NO	12	8	YES		1		0	9	Yes		N2b	T4a	6964		WITH TUMOR	YES		YES	Progressive Disease	NO
TCGA-CM-4752-01A	58	76.78.0	Nationwide Children's Hospital	TCGA-CM-4752-F5918	64dcc7e8-772a-4454-8875-9a2a1a3a49d2	TCGA-CM-4752	NO			NO		22	10	0	89E0114D-4BFE-4736-AC33-918C0F9A7F8F			YES	No	YES	NO			NO		23	NO		12	1	NO		0		0		No	M0	N0	T3	4752	YES	TUMOR FREE	NO	2.2	YES		NO
TCGA-A6-2674-01A	71	28.86.0	Nationwide Children's Hospital	TCGA-A6-2674-F4946	a2a687ff-5106-4f42-938f-0d2da5d374d9	TCGA-A6-2674	NO			NO		22	15	0	0CA9A3DC-D96E-4EA9-B42B-A052BA235679			NO	No	YES	NO					20	NO		12	10	YES		0		7	0	No	M1	N2	T3	2674		TUMOR FREE	YES	32.8	YES		NO
TCGA-A6-2674-01B	71	28.86.0	Nationwide Children's Hospital	TCGA-A6-2674-F4946	a2a687ff-5106-4f42-938f-0d2da5d374d9	TCGA-A6-2674	NO			NO		22	15	0	0CA9A3DC-D96E-4EA9-B42B-A052BA235679			NO	No	YES	NO					20	NO		12	10	YES		0		7	0	No	M1	N2	T3	2674		TUMOR FREE	YES	32.8	YES		NO
TCGA-A6-2674-11A	71	28.86.0	Nationwide Children's Hospital	TCGA-A6-2674-F4946	a2a687ff-5106-4f42-938f-0d2da5d374d9	TCGA-A6-2674	NO			NO		22	15	0	0CA9A3DC-D96E-4EA9-B42B-A052BA235679			NO	No	YES	NO					20	NO		12	10	YES		0		7	0	No	M1	N2	T3	2674		TUMOR FREE	YES	32.8	YES		NO
TCGA-F4-6855-01A	70	157.71.0	Nationwide Children's Hospital	TCGA-F4-6855-F39564	210DE0FD-8EA9-40C1-B50C-35FF6A92355D	TCGA-F4-6855				NO		22	25	0	E099EF6F-BEA3-41D9-8382-DEC8D305C4EE	Scheduled Follow-up Submission	Complete Remission/Response		No	YES					NO	12	NO		12	1	NO		0		0		No	M0	N0	T3	6855	NO	TUMOR FREE	NO		YES	Complete Remission/Response	NO
TCGA-A6-5664-01A	80	138.78.0	Nationwide Children's Hospital	TCGA-A6-5664-F15773	1a788873-317a-4b1c-902b-33fdd6561dba	TCGA-A6-5664	NO			YES		22	31	0	97A84A19-32D3-447D-BB35-947F38E79BD4			YES	No	YES	NO			YES		18	YES	NO	12	8	YES	0	0	5	5		No	MX	N2a	T4a	5664		WITH TUMOR	NO	17.4	YES		NO
TCGA-AA-3842-01A	51	41.78.0	Nationwide Children's Hospital	TCGA-AA-3842-F38229	3D95E78B-2025-41B4-B8CA-F463B4644D6C	TCGA-AA-3842	NO					22	11	0	C807C424-9DA4-46CF-A5AC-7A1B168D43DB	Scheduled Follow-up Submission	Complete Remission/Response	YES	No	YES	NO			NO	NO	12	YES		12	12			0		2		No	M0	N1	T2	3842		TUMOR FREE	YES		YES	Complete Remission/Response	NO
TCGA-AA-3833-01A	63	36.83.0	Nationwide Children's Hospital	TCGA-AA-3833-F38114	EBDEE7A5-CF60-4FBC-84B0-6AAD6A6914E7	TCGA-AA-3833	NO					22	10	0	D886192B-AD35-400E-A434-AEFAA0C8F3EE	Scheduled Follow-up Submission	Complete Remission/Response	YES	No	YES	NO			NO	NO	12	YES		12	12			0		0		No	M0	N0	T3	3833		TUMOR FREE	NO		YES	Complete Remission/Response	NO
TCGA-CM-6677-01A	75	138.78.0	Nationwide Children's Hospital	TCGA-CM-6677-F15655	aed45a05-326d-4ef3-9ff8-8aa0ff710903	TCGA-CM-6677	NO			YES		22		0	C9880ED7-FB38-4AC1-AD79-51D677572697	Scheduled Follow-up Submission		NO	No	YES	NO			NO		20	NO		12	8	NO		0		0		No	M0	N0	T3	6677	NO	TUMOR FREE	NO	3.7	YES		NO
TCGA-CA-6719-01A	77	138.78.0	Nationwide Children's Hospital	TCGA-CA-6719-F70853	F82DDDBD-3E83-4D29-96E3-FA35360E29E1	TCGA-CA-6719						22	10	0	2240B24C-7802-444F-8912-31DCB63AD71C	Scheduled Follow-up Submission	Progressive Disease		No	YES					NO				12	3							No	M0	N0	T3	6719		WITH TUMOR	NO		NO	Progressive Disease	NO
TCGA-AA-3713-01A	68	116.77.0	Nationwide Children's Hospital	TCGA-AA-3713-F38102	2EB4E61D-7410-424A-8F8C-6E1AF49CE27E	TCGA-AA-3713						22	10	0	C46013B0-19C5-46DD-B099-1141FF36D439	Scheduled Follow-up Submission	Partial Remission/Response	YES	No	YES	NO			NO	NO	15			12	12			0		0		Yes	M1	N0	T3	3713		TUMOR FREE	YES	83.68	YES	Partial Remission/Response	YES
TCGA-AA-3713-11A	68	116.77.0	Nationwide Children's Hospital	TCGA-AA-3713-F38102	2EB4E61D-7410-424A-8F8C-6E1AF49CE27E	TCGA-AA-3713						22	10	0	C46013B0-19C5-46DD-B099-1141FF36D439	Scheduled Follow-up Submission	Partial Remission/Response	YES	No	YES	NO			NO	NO	15			12	12			0		0		Yes	M1	N0	T3	3713		TUMOR FREE	YES	83.68	YES	Partial Remission/Response	YES
TCGA-DM-A28H-01A	50	154.69.0	Nationwide Children's Hospital	TCGA-DM-A28H-F19042	9364276D-F763-4A86-BD7A-BBF10B1523DB	TCGA-DM-A28H	YES	Normal				22	5	0	3E0115D6-4A1F-4E66-9CF0-EE35AC4E45DD	Scheduled Follow-up Submission		NO	No	YES	YES		NO			12	NO	NO	12	12		1	0	6	8		No	M0	N2	T3	A28H					YES
TCGA-D5-6538-01A	79	116.77.0	Nationwide Children's Hospital	TCGA-D5-6538-F28624	798baee4-cda2-479c-ac27-f84845d43d2d	TCGA-D5-6538				NO		22	27	0	E5469655-F16F-489F-A6B0-E45433B89506	Scheduled Follow-up Submission		NO	No	YES	NO			NO		14	NO		12	2	NO				10	0	No	M0	N2	T3	6538	NO	TUMOR FREE	YES	23.5	YES		NO
TCGA-A6-A565-01A	34	300.56.0	Nationwide Children's Hospital	TCGA-A6-A565-F42133	FE61AD85-7191-41E6-A1C8-607C0EBBB29F	TCGA-A6-A565				YES		22	12	0	AD1B8A8F-D114-40DD-871A-7947B764EBAD	Additional New Tumor Event	Progressive Disease	NO	No	YES	YES				NO	41	YES		12	4	YES		0		13		No	MX	N2	T3	A565		WITH TUMOR	YES	71.5	YES	Progressive Disease	NO
TCGA-F4-6808-01A	54	138.78.0	Nationwide Children's Hospital	TCGA-F4-6808-F35403	8E64F2AF-6776-479E-9EE3-7FBA9B924E6E	TCGA-F4-6808	NO			NO		22	26	0	1C23378C-01EE-4E57-B647-15B3F53A819D	Scheduled Follow-up Submission	Complete Remission/Response	NO	No	YES	NO			NO	NO	3	NO	NO	12	9	NO	0		0	0	0	No	M0	N0	T1	6808	NO	TUMOR FREE	NO		YES	Complete Remission/Response	NO
TCGA-CK-4948-01B	45	89.77.0	Nationwide Children's Hospital	TCGA-CK-4948-F9692	8a9a7c16-4f87-48f4-941b-fd7e4b50c299	TCGA-CK-4948	NO		1	NO		22	31	0	4422EF5B-48B2-47C6-BC7A-441B9C13528B			NO	No	YES	NO			NO		20		NO	12	3	YES	0		10	3	0	No	M0	N1	T3	4948		TUMOR FREE	NO	1.2	YES		NO
TCGA-AA-A029-01A	67	33.79.0	Nationwide Children's Hospital	TCGA-AA-A029-F37286	F6105D3D-79F1-41B3-B0BB-F3B4365BCD2B	TCGA-AA-A029	NO					22	1	0	D6632810-C957-4ECA-AA91-8DA30D6DBDE7	Scheduled Follow-up Submission	Complete Remission/Response	YES	No	YES	NO			NO	NO	27			12	12			0		0		No	M0	N0	T3	A029		TUMOR FREE	NO	1.97	YES	Complete Remission/Response	NO
TCGA-AA-3524-01A	85	28.86.0	Nationwide Children's Hospital	TCGA-AA-3524-F37304	5B501504-C513-4987-909E-E7449DB244C4	TCGA-AA-3524	NO					22	1	0	D3108AA7-F169-49D3-AC4D-FE0BA8A7762C	Scheduled Follow-up Submission	Complete Remission/Response	YES	No	YES	NO			NO	NO	28	NO		12	12			0		0		Yes	M0	N0	T3	3524		TUMOR FREE	NO	1.3	YES	Complete Remission/Response	NO
TCGA-AA-3524-11A	85	28.86.0	Nationwide Children's Hospital	TCGA-AA-3524-F37304	5B501504-C513-4987-909E-E7449DB244C4	TCGA-AA-3524	NO					22	1	0	D3108AA7-F169-49D3-AC4D-FE0BA8A7762C	Scheduled Follow-up Submission	Complete Remission/Response	YES	No	YES	NO			NO	NO	28	NO		12	12			0		0		Yes	M0	N0	T3	3524		TUMOR FREE	NO	1.3	YES	Complete Remission/Response	NO
TCGA-WS-AB45-01A	52	422.38.0	Nationwide Children's Hospital	TCGA-WS-AB45-F66635	3963FADD-C5DA-4112-8E8B-9D7C80318C3D	TCGA-WS-AB45			0.05	NO		22	21	0	8F7FB491-ADC5-4C55-A42E-C514040AAA7D	Scheduled Follow-up Submission	Complete Remission/Response	YES	No	YES				YES	NO	13	NO		12	10			0		0	0	No	MX	N0	T3	AB45	NO	TUMOR FREE	NO		YES	Complete Remission/Response	NO
TCGA-F4-6856-01A	45	157.71.0	Nationwide Children's Hospital	TCGA-F4-6856-F36394	A8563485-6578-4A8D-A92E-48CACE79CD08	TCGA-F4-6856	NO					22	30	0	1BF718B3-9C90-49EF-B6E4-0EAADDA717B8	Scheduled Follow-up Submission	Complete Remission/Response		No	YES	NO				NO	21	NO		12	10	NO		0		0	0	No	M0	N0	T2	6856	NO	TUMOR FREE	YES		YES	Complete Remission/Response	NO
TCGA-CK-4947-01B	46	89.77.0	Nationwide Children's Hospital	TCGA-CK-4947-F9794	dccfb70e-98e2-44e0-b30c-c8fb98e6568a	TCGA-CK-4947	NO			NO		22	31	0	180A0334-3648-4B25-AC22-6B0AF5960ADE			NO	No	YES	NO					12			12	3	NO				3	0	No	M0	N1	T4	4947		WITH TUMOR	NO	2.5	YES		NO
TCGA-AA-3556-01A	78	28.86.0	Nationwide Children's Hospital	TCGA-AA-3556-F37512	C9594DA2-4604-4F06-BFB6-5AD600AB26ED	TCGA-AA-3556	NO					22	3	0	5E5173E6-1871-4BEF-AB26-5C5AD68F7D41	Scheduled Follow-up Submission		YES	No	YES	NO			NO	NO	22	NO		12	12			0		0		Yes	M0	N0	T2	3556			NO		YES		NO
TCGA-AA-A00A-01A	80	30.80.0	Nationwide Children's Hospital	TCGA-AA-A00A-F37921	4274FADE-C589-4BCE-B8FB-07317015B2A9	TCGA-AA-A00A	NO					22	6	0	98C92EC8-5A64-4E87-BB20-CC9E57AEA7C5	Scheduled Follow-up Submission		NO	No	YES	NO			NO	NO	34	NO		12	12			0		0		No	M0	N0	T3	A00A			NO		YES		NO
TCGA-AA-A00L-01A	66	30.80.0	Nationwide Children's Hospital	TCGA-AA-A00L-F37320	98A32611-7271-4A70-A38A-74BC81F2C611	TCGA-AA-A00L	NO					22	1	0	8BAFFC70-CB1E-4470-999E-C283791999A4	Scheduled Follow-up Submission	Complete Remission/Response	YES	No	YES	NO			NO	NO	32	NO		12	12			0		0		Yes	M0	N0	T3	A00L		TUMOR FREE	NO		YES	Complete Remission/Response	NO
TCGA-AZ-6603-01A	77	138.78.0	Nationwide Children's Hospital	TCGA-AZ-6603-F34153	E2EE8BA9-6429-4858-B328-FF367A87CF95	TCGA-AZ-6603						22	31	0	3B0099C1-EFE4-4CC8-83FF-1688D4A2C0CD	Scheduled Follow-up Submission	Complete Remission/Response		No	YES					NO	3	NO		12	7					0		No	MX	N1	T2	6603	NO	TUMOR FREE	NO		YES	Complete Remission/Response	NO
TCGA-AZ-6603-11A	77	138.78.0	Nationwide Children's Hospital	TCGA-AZ-6603-F34153	E2EE8BA9-6429-4858-B328-FF367A87CF95	TCGA-AZ-6603						22	31	0	3B0099C1-EFE4-4CC8-83FF-1688D4A2C0CD	Scheduled Follow-up Submission	Complete Remission/Response		No	YES					NO	3	NO		12	7					0		No	MX	N1	T2	6603	NO	TUMOR FREE	NO		YES	Complete Remission/Response	NO
TCGA-AZ-4681-01A	79	76.78.0	Nationwide Children's Hospital	TCGA-AZ-4681-F19859	e199bddc-959b-4ea9-940c-8821d948850f	TCGA-AZ-4681				YES		22	30	0	F666D81D-23B3-4CA3-B52A-005572F96F84				No	YES									12	12	YES		1				No	M0	N0	T3	4681		TUMOR FREE	NO	15.1			NO
TCGA-AA-3956-01A	65	41.78.0	Nationwide Children's Hospital	TCGA-AA-3956-F37978	8423C589-DAD2-4222-AD99-BA5A1FD92075	TCGA-AA-3956	NO					22	8	0	E363C039-928D-4F28-B2D8-5A269671B2F0	Scheduled Follow-up Submission		YES	No	YES	NO			NO	NO	36	NO		12	12			0		0		No	M0	N0	T3	3956			NO	3.5	YES		NO
TCGA-DM-A1D4-01A	80	132.71.0	Nationwide Children's Hospital	TCGA-DM-A1D4-F19037	0C2A00EB-52A7-4024-A2C8-BB758E75ACD0	TCGA-DM-A1D4	YES	Normal				22	2	0	0CA4780E-3637-418E-A249-19693DE5CB7B	Scheduled Follow-up Submission			No	YES	NO					15	NO	NO	12	12		0	0	5	0		No	M0	N0	T3	A1D4					YES
TCGA-AA-3966-01A	89	45.80.0	Nationwide Children's Hospital			TCGA-AA-3966	NO					22		0	4481764D-B6A1-4FF6-9DA8-E519A6825876			YES	No	YES	NO			NO		14	YES		12				0		0		No	M0	N0	T3	3966					YES
TCGA-AZ-4323-01A	37	138.78.0	Nationwide Children's Hospital	TCGA-AZ-4323-F19855	d48d2369-d5d1-43a9-bc42-08696d05ce5e	TCGA-AZ-4323						22	29	0	7A6143FD-F072-4DEE-9DF9-EEC89AF38748				No	YES						30			12	12					5		No	M1	N2	T4	4323		WITH TUMOR	YES		YES		NO
TCGA-A6-A56B-01A	57	300.56.0	Nationwide Children's Hospital	TCGA-A6-A56B-F45684	9057886A-BF48-4C84-BAA1-32D272E06D4D	TCGA-A6-A56B	NO		15	YES		22	22	0	879316C9-2D16-4496-84CD-CFC6A08807A3	Additional New Tumor Event		NO	No	YES	YES				NO	25	YES		12	7	NO		0		3		No	M0	N1	T3	A56B		TUMOR FREE	YES	13.2	YES	Complete Remission/Response	NO
TCGA-D5-6541-01A	49	116.77.0	Nationwide Children's Hospital	TCGA-D5-6541-F28627	51177e35-3947-4f3c-88dc-2dbbfc7835c3	TCGA-D5-6541	NO		30			22	27	0	498E643C-4D1F-458E-BBD4-DDBD8BDC3AEB	Scheduled Follow-up Submission			No	YES	NO			NO		13	NO		12	2	NO				0	0	No	M0	N0	T3	6541	NO	TUMOR FREE	NO	2	YES		NO
TCGA-5M-AAT5-01A		422.38.0	Nationwide Children's Hospital			TCGA-5M-AAT5						1			2315A3D7-32E2-42B3-A2DA-7075F90529F6														7												AAT5
TCGA-5M-AATA-01A		422.38.0	Nationwide Children's Hospital			TCGA-5M-AATA						1			15BB0FA3-D688-4BB4-9538-8EF351D5498E														7												AATA
[truncated: 70 more columns]
