# Supplementary material for: Hsa-miR-181a-2-3p inhibits the oncogenicity of colon cancer by directly targeting STING
Source: Aging (Albany NY). 2024 Aug 9;16(15):11729–43. doi: 10.18632/aging.206059 (PMC11346793; doi:10.18632/aging.206059)
Supplement: Supplementary Table 2 [file aging-16-206059-s003.xlsx]

## Sheet: aging-24-018742-s003
Supplementary Table 2. The processed data of miR-181a-2-3p from TCGA datasets.
sampleID	miR-181a-2-3p
TCGA-DM-A288-01A	7.2584
TCGA-QL-A97D-01A	9.19477
TCGA-CM-6164-01A	8.70512
TCGA-G4-6299-01A	9.49922
TCGA-AA-3542-01A	8.06678
TCGA-F4-6463-01A	9.83146
TCGA-AZ-4615-01A	8.74127
TCGA-AA-3549-01A	8.1998
TCGA-AY-4071-01A	8.27195
TCGA-CM-4752-01A	8.22796
TCGA-AA-3516-01A	8.00553
TCGA-AA-3688-01A	7.7322
TCGA-AA-3854-01A	7.19888
TCGA-A6-3809-01A	8.50577
TCGA-CM-6165-01A	8.44491
TCGA-CM-4751-01A	8.38071
TCGA-AA-3989-01A	8.98927
TCGA-AA-3494-01A	9.11271
TCGA-CM-4750-01A	8.48154
TCGA-CM-6161-01A	9.47268
TCGA-NH-A50U-01A	10.0992
TCGA-DM-A0XF-01A	9.68689
TCGA-AA-3529-01A	8.91014
TCGA-AA-3949-01A	8.07366
TCGA-AA-3848-01A	8.42882
TCGA-CA-6715-01A	8.5711
TCGA-AA-3818-01A	7.88257
TCGA-AD-6899-01A	9.62105
TCGA-A6-6138-01A	8.91316
TCGA-D5-6538-01A	8.55488
TCGA-A6-2675-01A	8.32506
TCGA-AA-3506-01A	7.77531
TCGA-AA-3673-01A	8.89005
TCGA-AA-3520-11A	12.2486
TCGA-AU-3779-01A	9.22007
TCGA-CK-5916-01A	7.81564
TCGA-QG-A5Z1-01A	9.62818
TCGA-AZ-5407-01A	8.0596
TCGA-A6-2685-01A	8.65517
TCGA-AA-A00W-01A	9.37198
TCGA-CK-5914-01A	8.68868
TCGA-A6-2686-01A	8.0596
TCGA-A6-A5ZU-01A	9.66473
TCGA-AZ-4614-01A	7.63447
TCGA-NH-A50V-01A	9.83544
TCGA-QG-A5YX-01A	8.77651
TCGA-A6-2677-01A	7.76113
TCGA-AZ-6608-01A	9.02204
TCGA-CA-6717-01A	7.98262
TCGA-CM-4746-01A	8.52996
TCGA-AM-5820-01A	7.45694
TCGA-D5-6539-01A	8.87872
TCGA-5M-AAT6-01A	10.4595
TCGA-5M-AATA-01A	10.2818
TCGA-A6-6141-01A	9.27217
TCGA-CM-4743-01A	9.41773
TCGA-CK-6747-01A	8.34894
TCGA-D5-6533-01A	7.92551
TCGA-A6-2672-01B	9.76319
TCGA-QG-A5Z2-01A	8.93355
TCGA-A6-6780-01A	8.85802
TCGA-F4-6459-01A	7.7345
TCGA-A6-5657-01A	8.19258
TCGA-NH-A8F7-01A	8.45963
TCGA-G4-6321-01A	8.14597
TCGA-AY-6196-01A	9.06925
TCGA-AA-3524-01A	7.63162
TCGA-DM-A1D0-01A	8.49633
TCGA-G4-6307-01A	8.47682
TCGA-5M-AATE-01A	8.54678
TCGA-AA-3697-01A	7.98028
TCGA-NH-A6GA-01A	10.6119
TCGA-AY-6197-01A	7.51562
TCGA-AA-3672-01A	8.76702
TCGA-AA-3684-01A	8.43573
TCGA-AZ-4323-01A	8.604
TCGA-AA-3971-01A	8.35501
TCGA-AA-A00D-01A	7.9944
TCGA-AD-6548-01A	8.2449
TCGA-AA-A01F-01A	8.1245
TCGA-A6-2674-01A	9.06931
TCGA-G4-6588-01A	8.44012
TCGA-AA-3842-01A	8.4334
TCGA-AZ-4315-01A	8.71832
TCGA-F4-6806-01A	9.04627
TCGA-AA-3510-01A	8.1589
TCGA-AY-A71X-01A	9.34337
TCGA-DM-A28F-01A	8.34091
TCGA-G4-6293-01A	8.21243
TCGA-5M-AAT4-01A	9.26285
TCGA-AU-6004-01A	7.90218
TCGA-AA-3970-01A	8.29479
TCGA-AA-3941-01A	8.40534
TCGA-DM-A28K-01A	8.32301
TCGA-CM-5344-01A	8.68759
TCGA-AA-3517-01A	8.63702
TCGA-G4-6309-01A	8.13997
TCGA-AY-6386-01A	8.49996
TCGA-AA-3678-01A	8.74677
TCGA-DM-A1DA-01A	7.91233
TCGA-AA-A01X-01A	10.7082
TCGA-AA-A02J-01A	8.26937
TCGA-CM-6677-01A	8.39528
TCGA-CA-5256-01A	8.45704
TCGA-D5-6923-01A	9.72214
TCGA-F4-6703-01A	8.95058
TCGA-G4-6294-01A	8.39331
TCGA-CM-5863-01A	8.39498
TCGA-G4-6304-01A	9.99823
TCGA-CM-5349-01A	8.21659
TCGA-G4-6625-01A	9.01082
TCGA-AA-3530-01A	8.4064
TCGA-NH-A5IV-01A	9.36366
TCGA-G4-6627-01A	7.73482
TCGA-DM-A28G-01A	9.41246
TCGA-DM-A28M-01A	7.55198
TCGA-D5-5539-01A	9.79793
TCGA-CM-6163-01A	8.90497
TCGA-AZ-6607-01A	9.26124
TCGA-AY-A8YK-01A	9.02816
TCGA-A6-3808-01A	7.92055
TCGA-AA-A010-01A	7.63433
TCGA-AA-3821-01A	8.71099
TCGA-AA-3869-01A	9.12183
TCGA-AA-3837-01A	8.46989
TCGA-A6-5661-01B	10.3838
TCGA-CK-4947-01B	8.82982
TCGA-AA-3531-01A	7.73642
TCGA-AA-3525-11A	12.4823
TCGA-CM-6167-01A	7.5828
TCGA-AA-3555-01A	8.25639
TCGA-4N-A93T-01A	8.21882
TCGA-AA-3521-01A	7.60794
TCGA-CA-5797-01A	8.42774
TCGA-CM-6166-01A	8.98514
TCGA-CK-4951-01A	8.95419
TCGA-CA-6719-01A	8.32152
TCGA-AA-A02R-01A	8.42728
TCGA-AA-3527-11A	10.6465
TCGA-AA-A02O-01A	8.25568
TCGA-A6-5666-01A	7.30208
TCGA-G4-6302-01A	6.7255
TCGA-AY-5543-01A	8.94947
TCGA-AA-3845-01A	9.84268
TCGA-F4-6704-01A	8.20056
TCGA-AA-3856-01A	8.93347
TCGA-AA-A00Q-01A	7.85401
TCGA-A6-6781-01B	11.4684
TCGA-D5-6920-01A	9.14677
TCGA-AA-3815-01A	7.47775
TCGA-D5-5538-01A	8.2565
TCGA-AA-3867-01A	7.97352
TCGA-A6-6782-01A	8.66686
TCGA-A6-3810-01A	8.40791
TCGA-AA-A01D-01A	8.5235
TCGA-G4-6311-01A	8.49476
TCGA-A6-3807-01A	8.50943
TCGA-AZ-5403-01A	8.82417
TCGA-AD-6888-01A	9.26248
TCGA-G4-6628-01A	8.07368
TCGA-DM-A1D6-01A	9.50044
TCGA-CM-5341-01A	9.3202
TCGA-AA-3862-01A	7.80291
TCGA-AA-3939-01A	9.34422
TCGA-AA-3514-01A	8.40736
TCGA-AA-3660-01A	8.69937
TCGA-AA-3833-01A	7.37896
TCGA-A6-2684-11A	12.4148
TCGA-AZ-6598-01A	9.62531
TCGA-AA-3679-01A	8.09783
TCGA-NH-A6GB-01A	8.87259
TCGA-DM-A285-01A	7.6954
TCGA-AZ-6605-01A	8.44531
TCGA-A6-4107-01A	9.3935
TCGA-DM-A1D4-01A	7.91309
TCGA-CA-6716-01A	9.03413
TCGA-CK-4952-01A	8.98241
TCGA-AZ-4616-01A	7.92258
TCGA-AA-3844-01A	9.16982
TCGA-D5-6541-01A	9.44559
TCGA-AA-A01G-01A	8.80006
TCGA-AA-3870-01A	7.87919
TCGA-D5-6532-01A	8.73701
TCGA-AA-3526-01A	8.94662
TCGA-D5-5541-01A	8.02652
TCGA-DM-A1DB-01A	8.06213
TCGA-A6-2684-01A	8.75824
TCGA-AA-3855-01A	8.94031
TCGA-G4-6322-01A	7.66139
TCGA-AA-3519-01A	7.68356
TCGA-D5-6537-01A	8.63288
TCGA-D5-6926-01A	9.51642
TCGA-NH-A6GC-01A	9.45647
TCGA-G4-6317-01A	9.12195
TCGA-AA-3984-01A	8.7213
TCGA-D5-6536-01A	9.41849
TCGA-AD-A5EK-01A	9.67423
TCGA-AA-3663-01A	8.82281
TCGA-CM-4744-01A	8.07382
TCGA-AA-3520-01A	9.18515
TCGA-AA-3543-01A	8.52472
TCGA-AD-6890-01A	9.11949
TCGA-G4-6314-01A	8.10763
TCGA-CM-5348-01A	8.69549
TCGA-AA-3558-01A	8.47061
TCGA-CK-6751-01A	8.45145
TCGA-D5-6929-01A	9.3038
TCGA-AA-3675-01A	9.95575
TCGA-A6-2681-01A	8.10013
TCGA-F4-6808-01A	8.8027
TCGA-DM-A282-01A	9.08755
TCGA-AA-3489-01A	8.46871
TCGA-AM-5821-01A	9.35484
TCGA-G4-6298-01A	9.59802
TCGA-AA-A01S-01A	8.18287
TCGA-DM-A28H-01A	8.09922
TCGA-AA-3966-01A	7.88418
TCGA-AA-3492-01A	7.54667
TCGA-4T-AA8H-01A	9.6808
TCGA-AA-3544-01A	8.85338
TCGA-AA-3956-01A	8.40349
TCGA-AA-3532-01A	8.82129
TCGA-AA-3955-01A	8.62247
TCGA-CK-5912-01A	8.00241
TCGA-AD-6895-01A	9.41413
TCGA-AA-3556-01A	7.83236
TCGA-CM-6678-01A	8.92504
TCGA-AA-3851-01A	9.35468
TCGA-CM-5860-01A	8.62668
TCGA-AA-3534-01A	8.99567
TCGA-AA-A02F-01A	9.72843
TCGA-AA-3979-01A	7.4491
TCGA-AA-A03J-01A	9.06646
TCGA-CM-6162-01A	8.92538
TCGA-AA-3522-01A	7.79607
TCGA-AA-A00U-01A	9.33357
TCGA-A6-2671-11A	12.0538
TCGA-F4-6807-01A	9.13151
TCGA-AA-3930-01A	7.47802
TCGA-AZ-6599-01A	9.2672
TCGA-AA-3947-01A	7.95367
TCGA-AZ-4681-01A	7.96049
TCGA-AZ-4684-01A	9.63631
TCGA-AA-3814-01A	7.66672
TCGA-CM-6679-01A	8.64578
TCGA-A6-6649-01A	9.98616
TCGA-G4-6297-01A	8.33046
TCGA-DM-A0X9-01A	7.88261
TCGA-AA-3553-01A	8.32821
TCGA-DM-A0XD-01A	8.29341
TCGA-AA-3511-01A	8.78968
TCGA-A6-A56B-01A	10.5665
TCGA-A6-5667-01A	7.35731
TCGA-CM-5868-01A	9.08873
TCGA-AA-3866-01A	8.22958
TCGA-DM-A1D8-01A	8.40525
TCGA-CM-6170-01A	8.27448
TCGA-AA-A01P-01A	9.20271
TCGA-DM-A28E-01A	8.79162
TCGA-AA-3994-01A	7.67556
TCGA-AA-3877-01A	8.16805
TCGA-WS-AB45-01A	9.4031
TCGA-AA-A00L-01A	7.92643
TCGA-CM-5864-01A	8.14642
TCGA-CA-5254-01A	10.2344
TCGA-CA-5255-01A	9.95426
TCGA-D5-6898-01A	8.87757
TCGA-AA-3696-01A	9.93427
TCGA-DM-A280-01A	8.17855
TCGA-AA-A00O-01A	8.49988
TCGA-A6-5659-01A	7.71752
TCGA-AD-6965-01A	9.19194
TCGA-CK-4948-01B	8.58851
TCGA-DM-A1HA-01A	8.17346
TCGA-5M-AAT5-01A	9.84977
TCGA-CM-6674-01A	7.32104
TCGA-F4-6809-01A	8.69785
TCGA-AY-A54L-01A	8.95033
TCGA-AA-3858-01A	8.62527
TCGA-D5-6531-01A	9.03921
TCGA-AA-3662-01A	10.3597
TCGA-AA-A02K-01A	8.80362
TCGA-AA-3710-01A	8.78473
TCGA-G4-6310-01A	5.92563
TCGA-AD-6889-01A	8.53643
TCGA-AA-3872-01A	7.49256
TCGA-A6-4105-01A	9.01888
TCGA-AA-A01R-01A	8.004
TCGA-AA-3975-01A	7.70793
TCGA-AD-6964-01A	9.66896
TCGA-AA-3562-01A	8.4421
TCGA-D5-6931-01A	9.3429
TCGA-D5-6924-01A	9.37036
TCGA-AA-3860-01A	8.55614
TCGA-A6-5665-01B	9.05413
TCGA-QG-A5YW-01A	8.80067
TCGA-D5-6540-01A	8.39959
TCGA-CA-6718-01A	8.52216
TCGA-A6-2685-11A	12.2617
TCGA-A6-2683-11A	12.7357
TCGA-G4-6323-01A	9.60758
TCGA-A6-A566-01A	10.1051
TCGA-AA-3986-01A	8.04643
TCGA-AA-3712-01A	8.60956
TCGA-A6-5662-01A	8.4385
TCGA-AA-3831-01A	8.24059
TCGA-AA-A02H-01A	8.07797
TCGA-CM-6676-01A	9.54104
TCGA-AA-3950-01A	9.0041
TCGA-AA-3685-01A	8.89872
TCGA-CK-5915-01A	8.64831
TCGA-AA-3548-01A	8.88815
TCGA-F4-6569-01A	8.8837
TCGA-F4-6461-01A	8.93477
TCGA-F4-6854-01A	9.31549
TCGA-F4-6856-01A	9.52299
TCGA-CM-4748-01A	10.0021
TCGA-AA-3538-01A	8.18659
TCGA-A6-5664-01A	10.4238
TCGA-AZ-4308-01A	8.71271
TCGA-CK-6746-01A	11.0869
TCGA-AA-3509-01A	9.58389
TCGA-AA-3680-01A	8.55508
TCGA-NH-A8F7-06A	8.54231
TCGA-A6-5656-01A	9.84235
TCGA-CM-6680-01A	7.5457
TCGA-A6-6650-01B	9.80179
TCGA-A6-6140-01A	8.59231
TCGA-AA-A024-01A	8.8753
TCGA-D5-6930-01A	9.1917
TCGA-CM-6675-01A	8.17045
TCGA-DM-A1D7-01A	9.53529
TCGA-AA-3695-01A	8.75593
TCGA-AA-3666-01A	7.9751
TCGA-CM-6171-01A	7.20299
TCGA-AA-3655-01A	8.60658
TCGA-CM-6169-01A	8.15721
TCGA-AA-3952-01A	8.97304
TCGA-T9-A92H-01A	9.51367
TCGA-AA-3715-01A	9.3461
TCGA-A6-5665-01A	8.02595
TCGA-AY-4070-01A	9.59995
TCGA-AA-3846-01A	8.17408
TCGA-AA-3819-01A	8.66813
TCGA-F4-6570-01A	9.10496
TCGA-AZ-6600-01A	8.08137
TCGA-AA-3667-01A	7.22479
TCGA-A6-5661-01A	8.51707
TCGA-AA-3554-01A	8.15184
TCGA-AZ-6606-01A	10.0145
TCGA-AA-3852-01A	8.70158
TCGA-D5-6922-01A	8.84423
TCGA-A6-6137-01A	8.79683
TCGA-A6-2672-01A	8.51291
TCGA-AA-3495-01A	9.02158
TCGA-A6-6650-01A	8.65243
TCGA-D5-7000-01A	8.86314
TCGA-SS-A7HO-01A	10.4822
TCGA-AA-3976-01A	8.96748
TCGA-AA-3811-01A	8.84283
TCGA-AA-A01V-01A	9.14829
TCGA-AD-A5EJ-01A	9.54787
TCGA-CK-4950-01A	8.29152
TCGA-AA-A00J-01A	7.8909
TCGA-AA-A02Y-01A	7.46478
TCGA-AZ-6603-01A	8.54562
TCGA-AA-A022-01A	8.51176
TCGA-NH-A8F8-01A	8.81086
TCGA-G4-6626-01A	8.07098
TCGA-AA-3875-01A	8.11339
TCGA-G4-6306-01A	8.33498
TCGA-G4-6320-01A	8.2697
TCGA-CK-6748-01A	8.85909
TCGA-AA-3864-01A	7.96813
TCGA-A6-6142-01A	8.96454
TCGA-A6-2678-01A	8.63327
TCGA-CA-5796-01A	7.93888
TCGA-A6-2676-01A	8.19741
TCGA-A6-A567-01A	9.13331
TCGA-AA-3713-01A	8.44485
TCGA-AD-5900-01A	8.39133
TCGA-A6-A565-01A	9.56431
TCGA-F4-6855-01A	10.0873
TCGA-AZ-6601-01A	8.56509
TCGA-CM-5861-01A	8.50219
TCGA-DM-A1HB-01A	8.68165
TCGA-DM-A1D9-01A	9.50213
TCGA-AZ-4682-01B	7.6805
TCGA-AZ-4313-01A	8.78017
TCGA-A6-5656-01B	10.2694
TCGA-A6-6652-01A	10.0961
TCGA-AA-3518-01A	8.54507
TCGA-DM-A28C-01A	10.3022
TCGA-D5-6927-01A	9.06225
TCGA-AA-3980-01A	8.22871
TCGA-AA-3681-01A	8.62876
TCGA-A6-2671-01A	8.45487
TCGA-A6-6781-01A	10.2104
TCGA-D5-6535-01A	8.31135
TCGA-AA-A029-01A	8.03109
TCGA-AD-6963-01A	9.78827
TCGA-CM-4747-01A	9.26721
TCGA-NH-A50T-01A	9.30946
TCGA-CM-6168-01A	8.50229
TCGA-F4-6460-01A	8.758
TCGA-AA-A01T-01A	8.03926
TCGA-RU-A8FL-01A	9.97308
TCGA-A6-6651-01A	7.46505
TCGA-AA-3850-01A	8.32135
TCGA-AA-3972-01A	8.14733
TCGA-AA-3812-01A	8.26616
TCGA-AY-A69D-01A	10.293
TCGA-AA-A01Z-01A	7.20512
TCGA-D5-6530-01A	8.0763
TCGA-G4-6586-01A	8.04344
TCGA-G4-6317-02A	8.36564
TCGA-D5-6928-01A	10.5291
TCGA-G4-6315-01A	8.70487
TCGA-D5-6534-01A	10.0391
TCGA-AA-3664-01A	6.81355
TCGA-A6-2680-11A	11.0853
TCGA-G4-6303-01A	8.61292
TCGA-AA-3692-01A	9.56047
TCGA-AA-3968-01A	8.2448
TCGA-F4-6805-01A	8.03742
TCGA-AA-3560-01A	8.29148
TCGA-D5-5537-01A	9.68157
TCGA-CM-5862-01A	8.37724
TCGA-D5-6932-01A	9.44168
TCGA-AA-3982-01A	9.11973
TCGA-DM-A28A-01A	8.26864
TCGA-CM-6172-01A	9.1159
TCGA-A6-2682-01A	8.75353
TCGA-D5-6529-01A	9.03173
TCGA-A6-2683-01A	8.44828
TCGA-CK-5913-01A	7.55697
TCGA-AA-3977-01A	9.19289
TCGA-AA-3496-01A	8.15328
TCGA-D5-5540-01A	8.99083
TCGA-AD-6901-01A	10.2979
TCGA-A6-2679-01A	8.5997
TCGA-AA-3552-01A	8.29137
TCGA-A6-5660-01A	9.44319
TCGA-A6-6648-01A	8.41683
TCGA-A6-6780-01B	10.2286
TCGA-AA-A03F-01A	8.28907
TCGA-A6-6654-01A	8.47359
TCGA-3L-AA1B-01A	9.26554
TCGA-AA-3693-01A	7.71239
TCGA-AA-3502-01A	7.71332
TCGA-AA-A02E-01A	8.92844
TCGA-AA-3861-01A	7.99632
TCGA-G4-6295-01A	8.20026
TCGA-AA-3527-01A	8.35908
TCGA-A6-2680-01A	8.58944
TCGA-QG-A5YV-01A	10.0563
TCGA-AA-3561-01A	9.06794
TCGA-AA-3525-01A	6.98407
TCGA-AA-3973-01A	7.86247
TCGA-A6-6653-01A	8.2258
TCGA-AA-3488-01A	8.88908
